# Supplementary material for: Colour and constitution of conjugate bases of benzodifurantrione, its ring-opened derivatives and benzodifuranone dye analogues
Source: Royal Society of Chemistry journal article supplement (doi:10.1039/d1ob02442f), 2022-01-01
Supplement: d1ob02442f1.pdf [file d1ob02442f1.pdf]

# Colour and constitution of conjugate bases of benzodifurantrione, its ring-opened derivatives, and benzodifuranone dye analogues

Michael G. Hutchings,<sup>\*1</sup> Anthony J. Lawrence<sup>1</sup> and Alan R. Kennedy<sup>2</sup>

<sup>1</sup> Department of Chemistry, University of Manchester, Manchester M13 9PL, UK

<sup>2</sup> Department of Pure and Applied Chemistry, University of Strathclyde, Glasgow G1 1XL, UK

## Electronic Supplementary Information

### Contents

|          |                                                                                                                                                                                                                                                                           |
|----------|---------------------------------------------------------------------------------------------------------------------------------------------------------------------------------------------------------------------------------------------------------------------------|
| Page S2  | Experimental and characterisation data – general                                                                                                                                                                                                                          |
| Page S3  | Methyl (5-hydroxy-2-oxo-3-phenyl-2,3-dihydro-1-benzofuran-6-yl)(oxo)acetate ( <b>6</b> ) and 5-hydroxy-6-[methoxy(oxo)acetyl]-3-phenyl-1-benzofuran-2-olate ( <b>16</b> )                                                                                                 |
| Page S8  | <i>N</i> -(2,5-dimethoxyphenyl)-2-(5-hydroxy-2-oxo-3-phenyl-2,3-dihydro-1-benzofuran-6-yl)-2-oxoacetamide ( <b>8</b> ) and 6-[(2,5-dimethoxyanilino)(oxo)acetyl]-5-hydroxy-3-phenyl-1-benzofuran-2-olate ( <b>17</b> )                                                    |
| Page S17 | <i>N</i> -(2,5-dimethoxyphenyl)-2-(5-hydroxy-3-phenyl-2-trimethylsilylmethoxy-1-benzofuran-6-yl)-2-oxoacetamide ( <b>12</b> ) and <i>N</i> -(2,5-dimethoxyphenyl)-2-(5-hydroxy-2-methoxy-3-phenyl-1-benzofuran-6-yl)-2-oxoacetamide ( <b>13</b> )                         |
| Page S20 | <i>N</i> -(2,5-dimethoxyphenyl)-2-(3-benzyl-5-hydroxy-2-oxo-3-phenyl-2,3-dihydro-1-benzofuran-6-yl)-2-oxoacetamide ( <b>14</b> ) and <i>N</i> -(2,5-dimethoxyphenyl)-2-[3-benzyl-5-(benzyloxy)-2-oxo-3-phenyl-2,3-dihydro-1-benzofuran-6-yl]-2-oxoacetamide ( <b>15</b> ) |
| Page S23 | Visible/NIR spectra                                                                                                                                                                                                                                                       |
| Page S27 | X-ray structure determination of compound <b>7</b>                                                                                                                                                                                                                        |
| Page S29 | Search of the Cambridge Crystal Structure Database                                                                                                                                                                                                                        |
| Page S38 | Theoretical calculations                                                                                                                                                                                                                                                  |

\* correspondence to [mghutchings@btinternet.com](mailto:mghutchings@btinternet.com)

DOI: 10.1039/x0xx00000x

### Experimental and characterisation data - general

All non-aqueous reactions were performed under an inert atmosphere of dry nitrogen using oven-dried glassware. Reagents were used as received. Solvents used for chemistry were of Analar quality.

Analytical TLC was carried out on pre-coated 0.2 mm silica plates. The plates were visualised by UV light at 254 and 330 nm. Nuclear magnetic resonance (NMR) spectra were recorded using residual non-deuterated solvent as the internal standard. Proton spectra ( $^1\text{H}$ ) were recorded at 400 or 500 MHz. Carbon spectra ( $^{13}\text{C}$ ) were recorded at 100 or 125 MHz. All chemical shifts ( $\delta_{\text{H}}$  and  $\delta_{\text{C}}$ ) are quoted in parts per million (ppm), using tetramethylsilane as a standard. Coupling constants  $J$  are given in Hertz (Hz). UV/vis/NIR spectra were recorded at 25°C. A 1 cm path length quartz cell was used. Solvents were 99+% grade with <50 ppm water. Solutions were prepared at 10 micromolar level concentrations ( $10^{-5}$  M).

Mass spectra were recorded using chemical ionisation (CI) and electrospray (ES) techniques.

IR spectra were run either in solution in a sodium chloride cell dissolved in the stated solvent or dispersed in a solid KBr disc.

Absorption maxima ( $\nu_{\text{max}}$ ) are quoted in wavenumbers ( $\text{cm}^{-1}$ ).

BDF dyes **1a,b,c,d** were available from previous work.<sup>1,2</sup> Hplc and  $^1\text{H}$  NMR confirmed their purity. BDT **2**, ester **6** and acid **7** were described in the earlier paper and its associated SI on phenylogous enolisation of BDT.<sup>3</sup>

### References

1. C. W. Greenhalgh, J. L. Carey and D. F. Newton, *Dyes and Pigments*, 1980, **1**, 103-120
2. C. W. Greenhalgh, J. L. Carey, N. Hall and D. F. Newton, *J. Soc. Dyers Col.*, 1994, **110**, 178-184
3. A. J. Lawrence, M. G. Hutchings, A. R. Kennedy and J. J. W. McDouall, *J. Org. Chem.*, 2010, **75**, 690-701

Methyl (5-hydroxy-2-oxo-3-phenyl-2,3-dihydro-1-benzofuran-6-yl)(oxo)acetate (**6**) and 5-hydroxy-6-[methoxy(oxo)acetyl]-3-phenyl-1-benzofuran-2-olate (**16**)

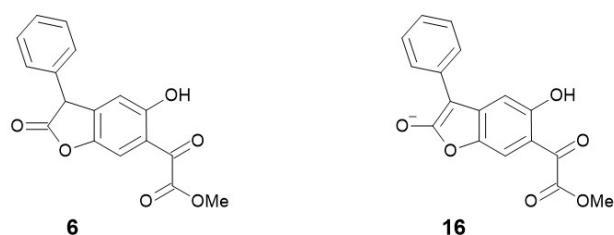

Details of the synthesis and characterisation of ester **6** were reported in the SI associated with reference 4 (main text). Conjugate base **16** was generated *in situ* by addition of triethylamine to solutions of **6**. In DMSO- $d_6$  excess amine led to partial ring closure back to the conjugate base **4** of BDT, as clearly evidenced by  $^1\text{H}$  NMR, below. A slight molar deficiency of amine gave cleaner NMR spectra. HMQC and HMBC spectra led to unambiguous assignments.  $^1\text{H}$  NMR (400 MHz, DMSO- $d_6$  + TEA)  $\delta_{\text{H}}$  ppm 1.11 (tr,  $J = 7$ ,  $\text{CH}_3(\text{Et}_3\text{NH}^+)$ ), 3.02 (dq,  $J = 7$  5,  $\text{CH}_2(\text{Et}_3\text{NH}^+)$ ), 3.85 (s, 3H,  $\text{CH}_3(\text{CO}_2\text{Me})$ ), 6.62 (s, 1H, Hb), 6.87 (s 1H, Hc), 7.02 (tr,  $J = 9$ , 1H, Hp), 7.33 (tr,  $J = 9$ , 2H, Hm), 7.83 (d,  $J = 9$ , 2H, Ho), 8.85 (br s,  $\text{N}^+\text{H}$ ), 11.15 (br s, OH).  $^{13}\text{C}$  NMR (100 MHz, DMSO- $d_6$  + TEA)  $\delta_{\text{C}}$  ppm 8.5 ( $\text{CH}_3(\text{Et}_3\text{NH}^+)$ ), 45.82 ( $\text{CH}_2(\text{Et}_3\text{NH}^+)$ ), 52.44 ( $\text{CH}_3(\text{CO}_2\text{Me})$ ), 89.24 (Ca), 96.13 (Cc), 103.5 (Ch), 104.37 (Cg), 123.0 (Cn), 124.82 (Cl), 128.12 (Cm), 136.12 (Ck), 141.11 (Ci), 142.7 (Cb), 161.61 (Cd), 165.51 (Ce), 169.88 (Cj), 181.41 (Cf).  $\lambda_{\text{max}}$  (DCM + 1 eqvt TEA) 451 nm ( $\epsilon_{\text{max}}$  4,800  $\text{M}^{-1} \text{cm}^{-1}$ ) (see also Table 2, main text). IR  $\nu_{\text{max}}$   $\text{cm}^{-1}$  (DCM + 1 eqvt TEA) 3100 (bw), 1720 (s), 1699 (s), 1530-1640 (m).

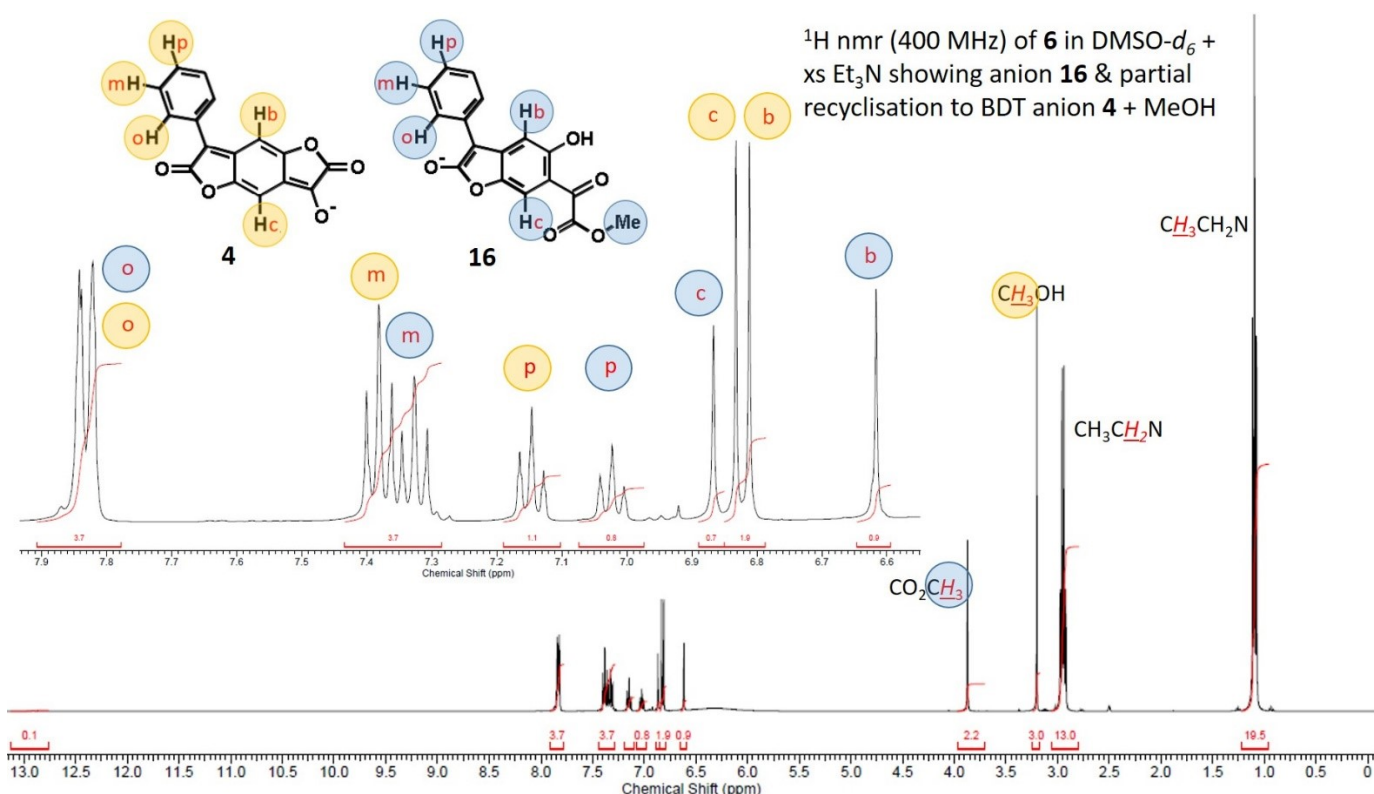

$^1\text{H}$  nmr spectrum of **6** (400 MHz,  $\text{DMSO-}d_6$  + <1 eqvt  $\text{Et}_3\text{N}$ )  
Mainly anion **16** + minor parent material (cf Ha at  $\delta_{\text{H}}$  5.45)

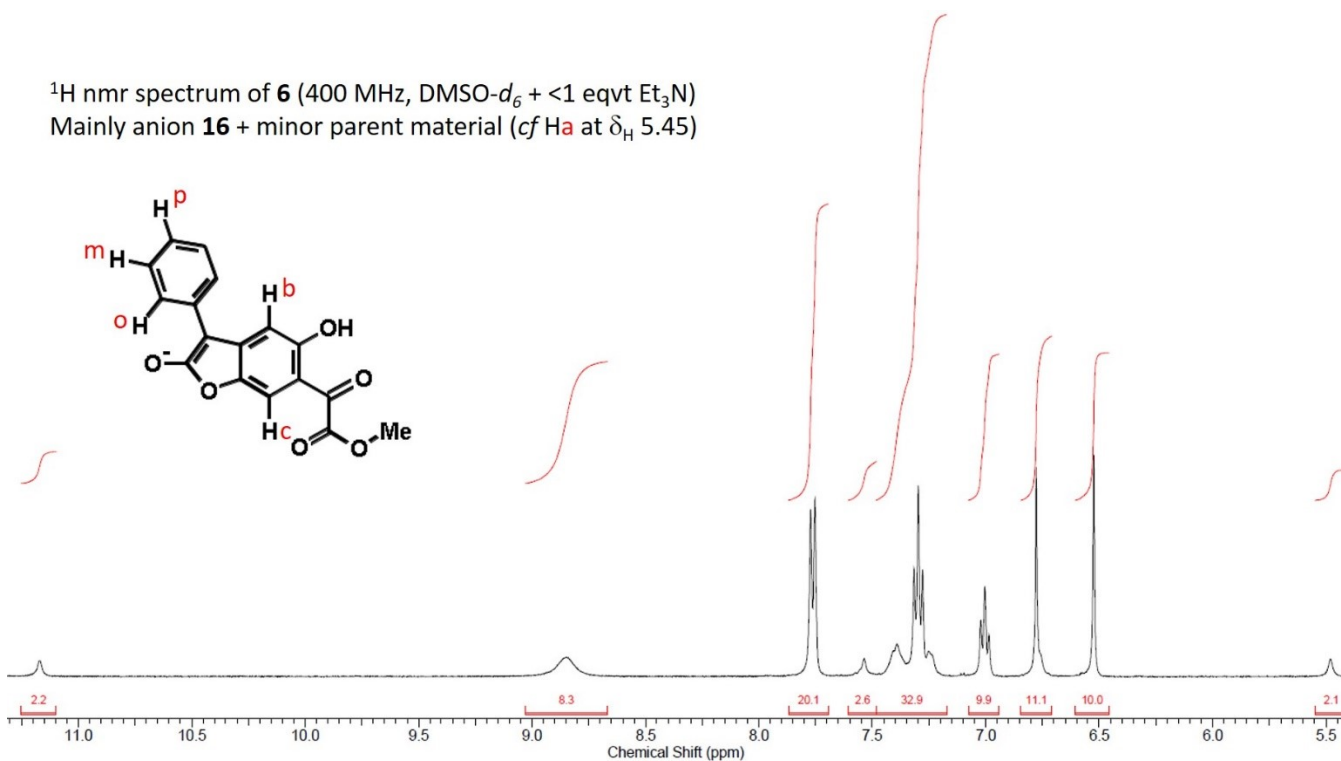

$^1\text{H}$  nmr spectrum of **6** (400 MHz,  $\text{DMSO-}d_6$  + <1 eqvt  $\text{Et}_3\text{N}$ )  
Mainly anion **16** + minor parent material

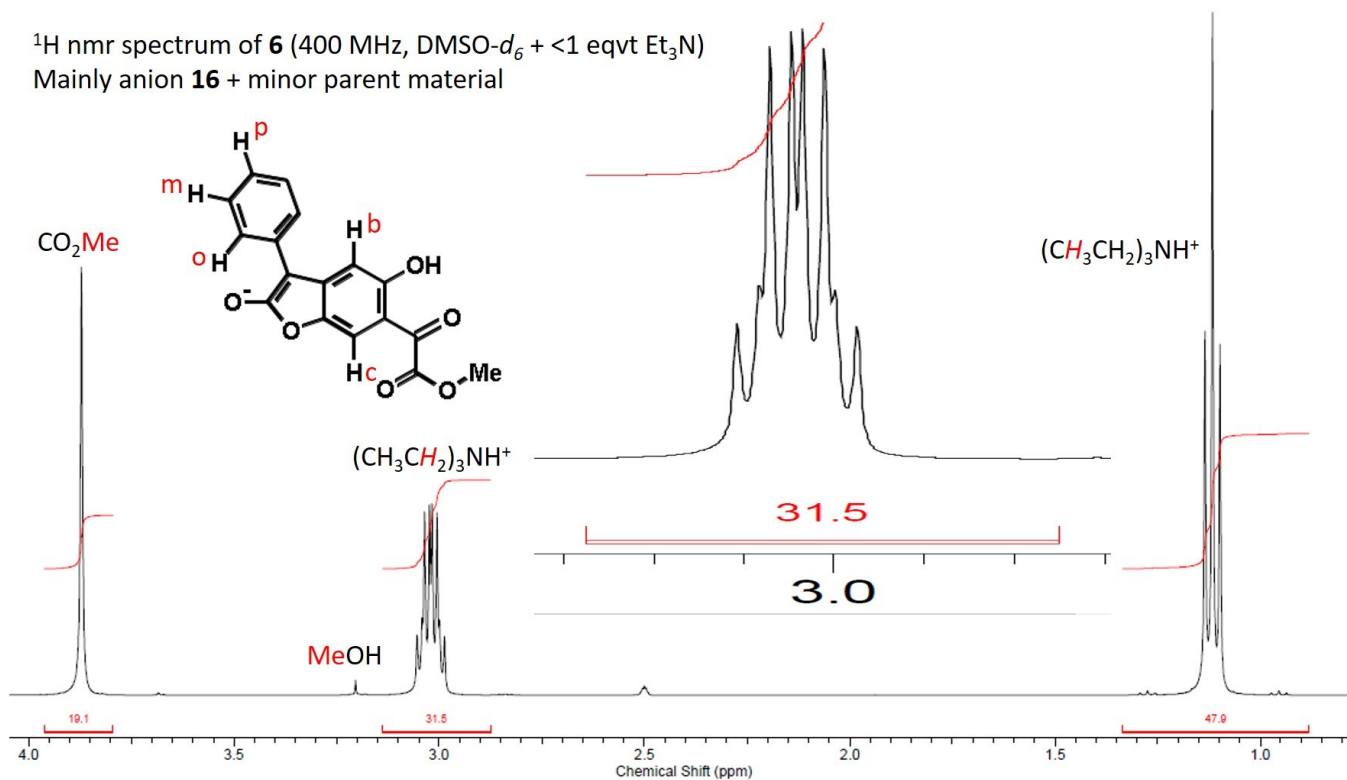

$^{13}\text{C}$  nmr (100MHz,  $\text{DMSO-}d_6$ ) of **6**  
 15 unique C atoms, all observed  
 Partially assigned by inspection

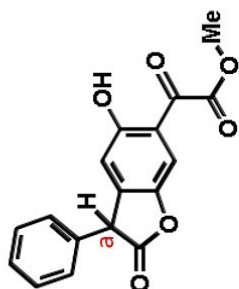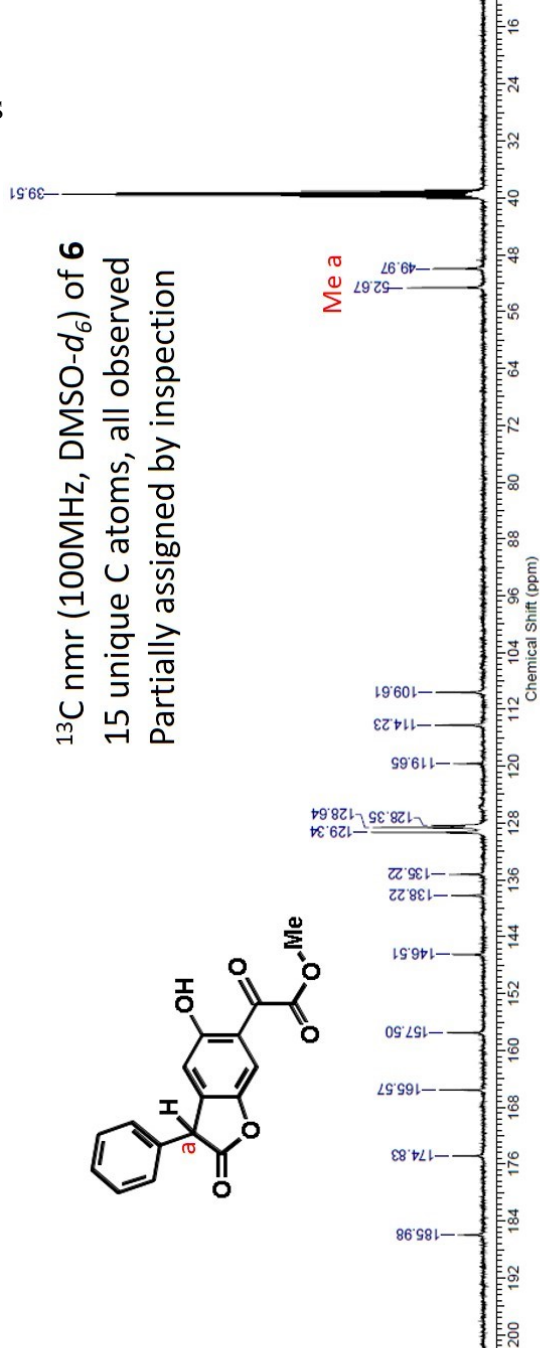

$^{13}\text{C}$  nmr (100MHz,  $\text{DMSO-}d_6 + \text{Et}_3\text{N}$ ) of **16**  
 Assigned by HMQC and HMBC

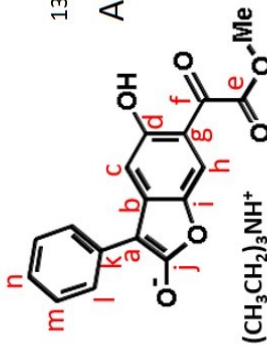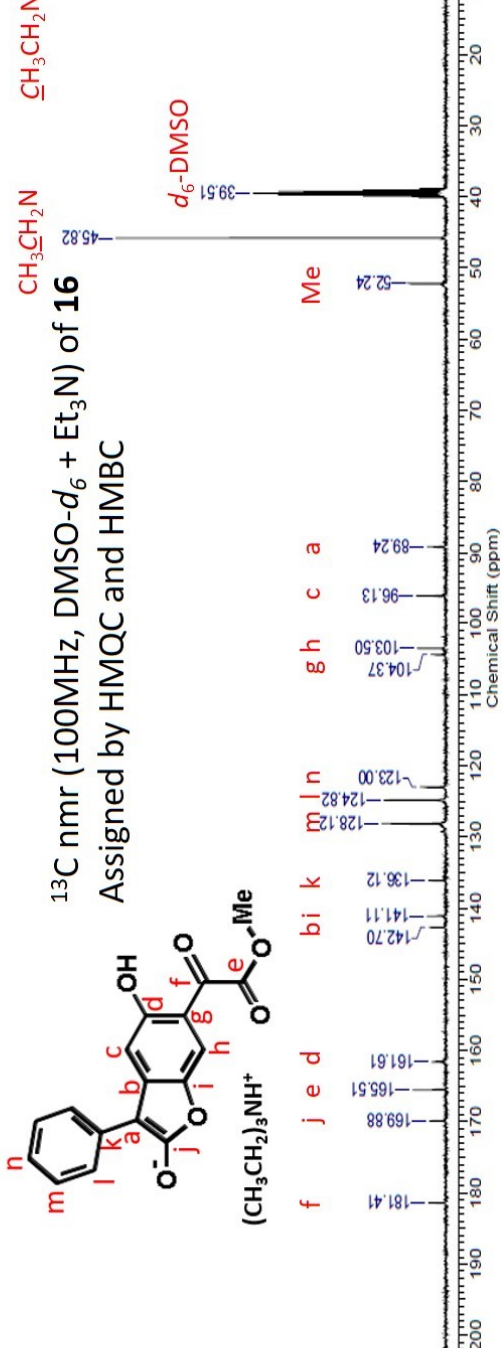

HMQC correlation **16** (DMSO- $d_6$  + Et<sub>3</sub>N)

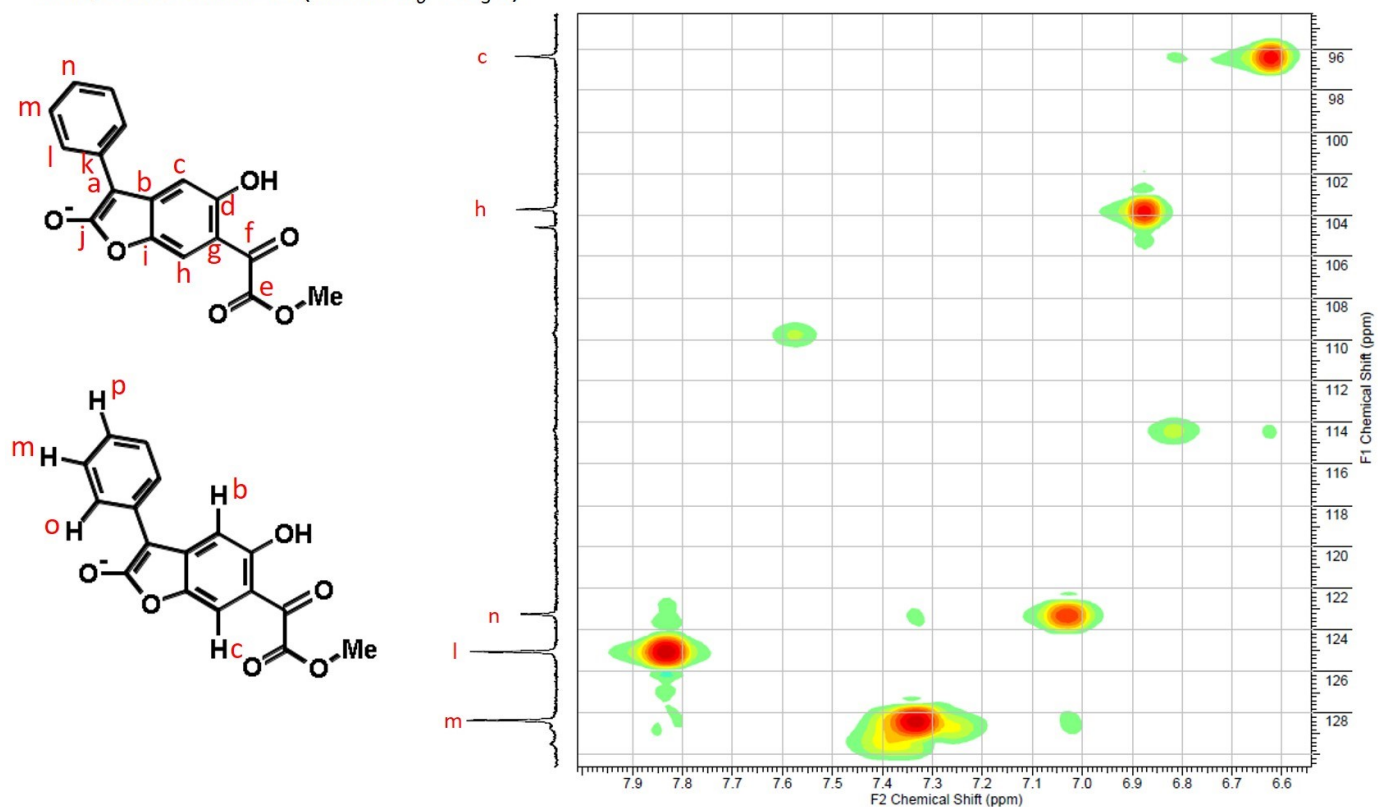

HMBC correlation **16** (DMSO- $d_6$  + Et<sub>3</sub>N)

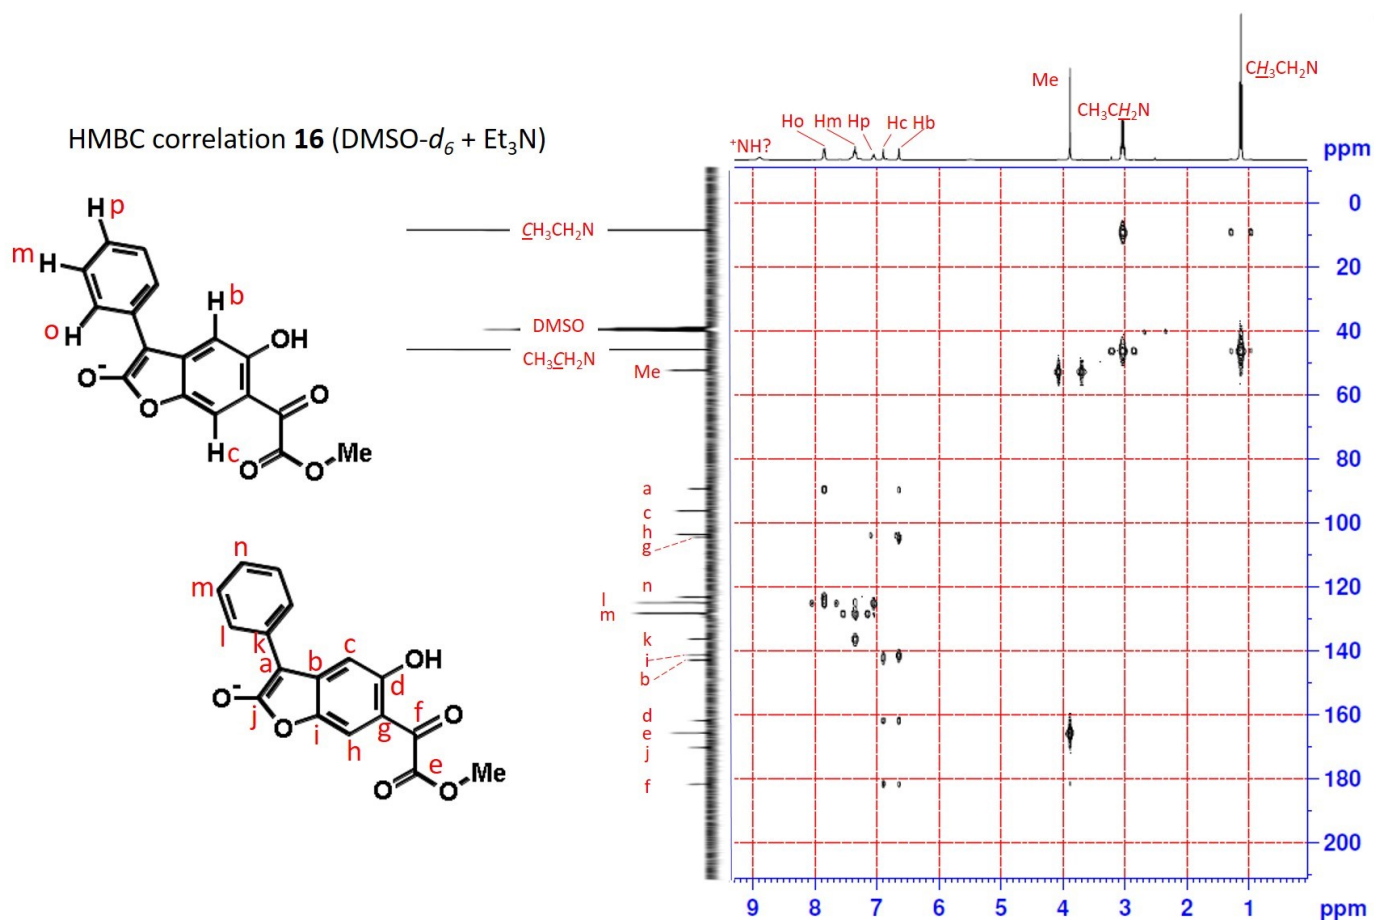

Summary of nmr assignments for **16** from HMQC and HMBC correlations (DMSO- $d_6$  + Et<sub>3</sub>N)

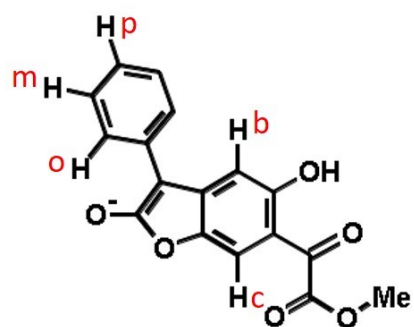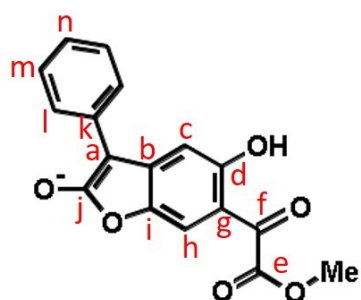

| Assignment | $\delta_c$ ppm | $\delta_H$ ppm & assignment |            |            |            |            |            |
|------------|----------------|-----------------------------|------------|------------|------------|------------|------------|
|            |                | 7.83<br>Ho                  | 7.33<br>Hm | 7.02<br>Hp | 6.87<br>Hc | 6.62<br>Hb | 3.85<br>Me |
| Me         | 52.44          |                             |            |            |            |            | HMQC       |
| a          | 89.24          | X                           |            |            |            | X          |            |
| c          | 96.13          |                             |            |            |            | HMQC       |            |
| h          | 103.5          |                             |            |            | HMQC       |            |            |
| g          | 104.37         |                             |            |            |            | X          |            |
| n          | 123            | X                           |            | HMQC       |            |            |            |
| l          | 124.82         | HMQC                        | w          | X          |            |            |            |
| m          | 128.12         |                             | HMQC       | w          |            |            |            |
| k          | 136.12         |                             | X          |            |            |            |            |
| i          | 141.11         |                             |            |            |            | X          |            |
| b          | 142.7          |                             |            |            | X          |            |            |
| d          | 161.61         |                             |            |            | X          | X          |            |
| e          | 165.51         |                             |            |            |            |            | X          |
| j          | 169.88         |                             |            |            |            |            |            |
| f          | 181.41         |                             |            |            | X          | w          | w          |

HMBC: X = strong correlation, usually 3-bond; w = weak, usually 2-bond

*N*-(2,5-dimethoxyphenyl)-2-(5-hydroxy-2-oxo-3-phenyl-2,3-dihydro-1-benzofuran-6-yl)-2-oxoacetamide (**8**) and 6-[(2,5-dimethoxyanilino)(oxo)acetyl]-5-hydroxy-3-phenyl-1-benzofuran-2-olate (**17**)

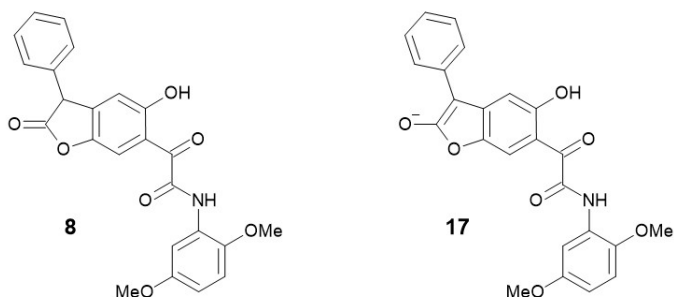

BDT (2g, 7.14mmol) and 2,5-dimethoxyaniline (1g, 6.53mmol) dissolved in acetic acid (20ml) were stirred at room temperature for 4 hours. The crude product was filtered and washed with acetic acid (50ml). The product was dried in a fan oven at 40°C overnight to give crude **8** as an orange solid (2.82g, 91.3%, mp 143°C). A sample (250mg) was purified by dissolving in chloroform (8ml) with sonication at room temperature, then filtered through glass wool to give a clear solution. On standing a small amount of solid precipitated. The solution was again filtered and then evaporated to give a yellow foam. The entire process was repeated. The product was dried under high vacuum for several hours to yield a final yellow foam (**8**; 141mg). <sup>1</sup>H NMR (500 MHz, CDCl<sub>3</sub>) δ<sub>H</sub> 3.85 (s, 3H, OMe), 3.92 (s, 3H, OMe), 4.94 (br s, 1H, Ha), 6.72 (dd, *J* = 3.0, 9.0, 1H, Hp'), 6.88 (d, *J* = 9.0, 1H, Hm'), 6.93 (d, *J* = 1.3, 1H, Hb), 7.23 (m, 2H, Ho), 7.40 (m, 3H, Hm and Hp), 8.18 (d, *J* = 3.0, 1H, Ho'), 8.68 (s, 1H, Hc), 9.65 (br s, 1H, NH), 11.98 (s, 1H, OH) ppm. <sup>13</sup>C NMR (75 MHz, CDCl<sub>3</sub>) δ<sub>C</sub> 50.60, 56.12, 56.60, 106.56, 110.71, 111.29, 113.84, 115.94, 116.99, 126.66, 128.54, 128.89, 129.65, 134.10, 139.19, 143.35, 146.45, 154.03, 159.00, 162.53, 174.24, 188.81 ppm. Mass spec EI/CI, 433 (M<sup>+</sup>). λ<sub>max</sub> (DCM + trace MSA) 389 nm (ε<sub>max</sub> 10,000 M<sup>-1</sup> cm<sup>-1</sup>). IR ν<sub>max</sub> (KBr) 3370 (NH amide), 3000-3200 (bm, OH), 1801 (lactone), 1683 (amide), 1624 (H-bonded ketone), 1527 cm<sup>-1</sup>; (DCM) 3347 (NH amide), 3100 (bw, OH)) 1818 (lactone), 1692 (amide), 1628 (H-bonded ketone), 1531 cm<sup>-1</sup>. Found C, 66.16%; H, 4.23%; N, 3.12%. C<sub>24</sub>H<sub>19</sub>NO<sub>7</sub> requires C, 66.51%; H, 4.42%; N, 3.23%.

Conjugate base **17** was generated *in situ* by addition of one equivalent of triethylamine to solutions of **8**. HMQC and HMBC spectra led to unambiguous NMR assignments, following. <sup>1</sup>H NMR (500 MHz, DMSO-*d*<sub>6</sub> + 1 eqvt TEA) δ<sub>H</sub> 1.08 (t, *J* = 7, 9H, CH<sub>3</sub>(Et<sub>3</sub>N<sup>+</sup>H)), 2.80 (q, *J* = 7, 6H, CH<sub>2</sub>(Et<sub>3</sub>N<sup>+</sup>H)), 3.75 (s, 3H, Me<sub>u</sub>), 3.85 (s, 3H, Me<sub>v</sub>), 6.57 (s, 1H, Hb), 6.68 (dd, *J* = 3.9, 1H, Hp'), 7.00 (d, *J* = 9, 1H, Hm'), 7.06 (tr, *J* = 9, 1H, Hp), 7.35 (tr, *J* = 9, 2H, Hm), 7.84 (d, *J* = 9, 2H, Ho), 8.00 (s, 1H, Hc), 8.01 (d, *J* = 3, 1H, Ho'), 10.00 (s, 1H, NH), 13.49 (bs, 1H, OH) ppm. <sup>13</sup>C NMR (125 MHz, DMSO-*d*<sub>6</sub> + 1 eqvt TEA) δ<sub>C</sub> 10.0 (CH<sub>3</sub>CH<sub>2</sub>N<sup>+</sup>), 45.05 (CH<sub>3</sub>CH<sub>2</sub>N<sup>+</sup>), 55.36 (Cu), 56.25 (Cv), 91.09 (Ca), 95.8 (Cc), 104.58 (Ch), 105.88 (Cg), 106.4 (Cp), 108.35 (Cr), 111.55 (Cs), 123.24 (Cn), 125.04 (Cl), 127.13 (Co), 128.07 (Cm), 135.83 (Ck), 141.3 (Ci), 142.82 (Cb), 143.05 (Ct), 153.12 (Cq), 162.5 (Ce), 163.92 (Cd), 170.09 (Cj), 177.51 (Cf) ppm. λ<sub>max</sub> (DCM + 1 eqvt Et<sub>3</sub>N) 496 nm (ε<sub>max</sub> 18,200 M<sup>-1</sup> cm<sup>-1</sup>). IR ν<sub>max</sub> (DCM + 1 eqvt Et<sub>3</sub>N) 3300 (w NH amide), 1681, 1649, 1620, 1598 cm<sup>-1</sup>.



$^1\text{H}$  nmr spectrum of amide (**8**) (500 MHz,  $\text{CDCl}_3$ )

↔ NOE interactions from a NOESY spectrum (not shown)

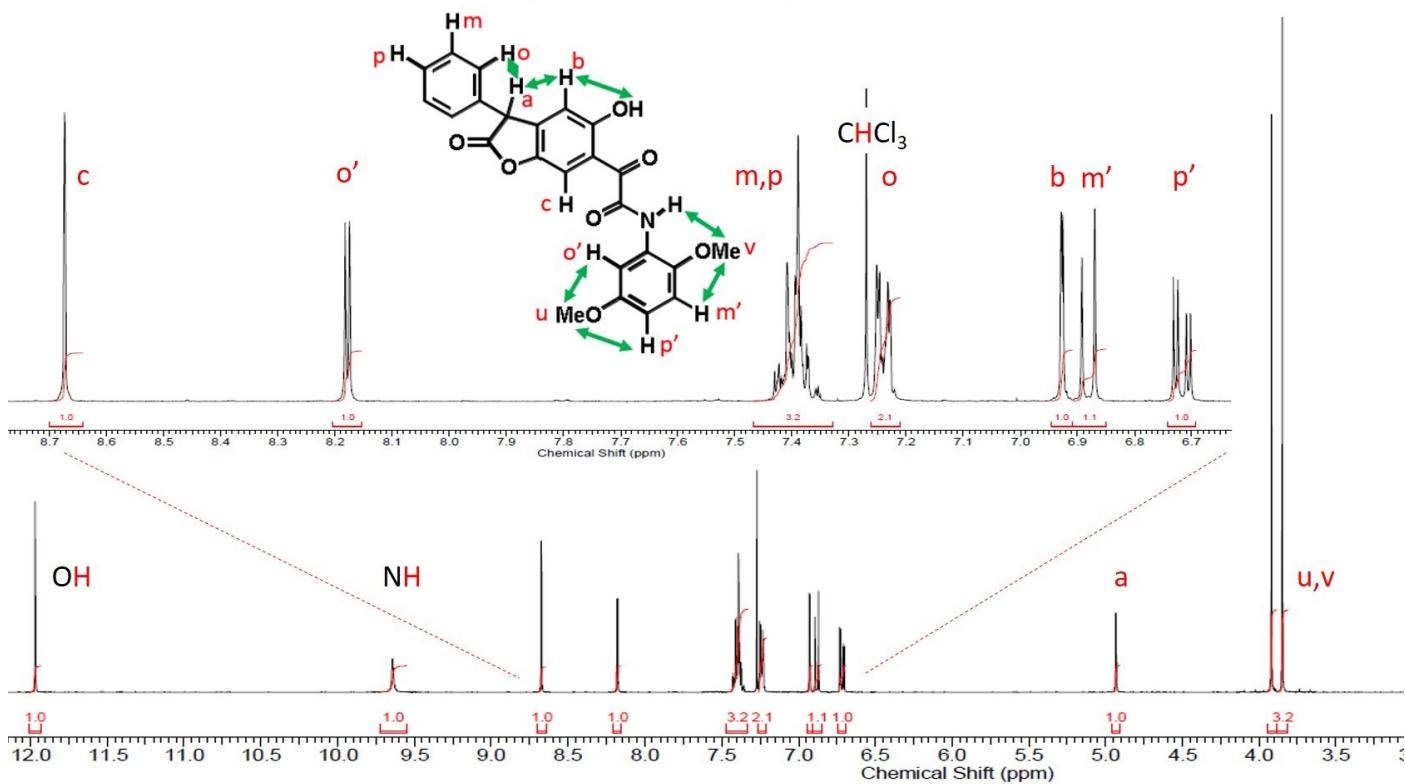

$^{13}\text{C}$  nmr spectrum of **8** (75 MHz,  $\text{CDCl}_3$ )

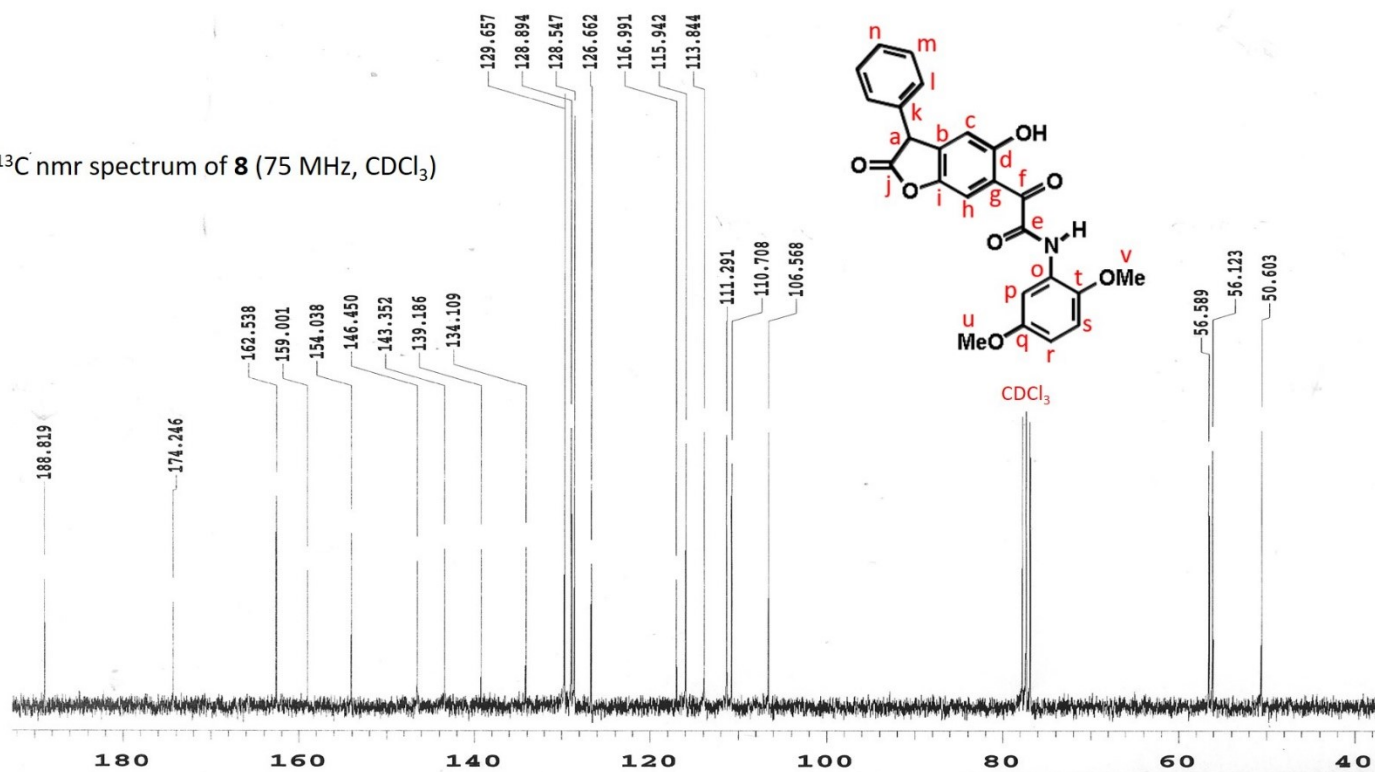

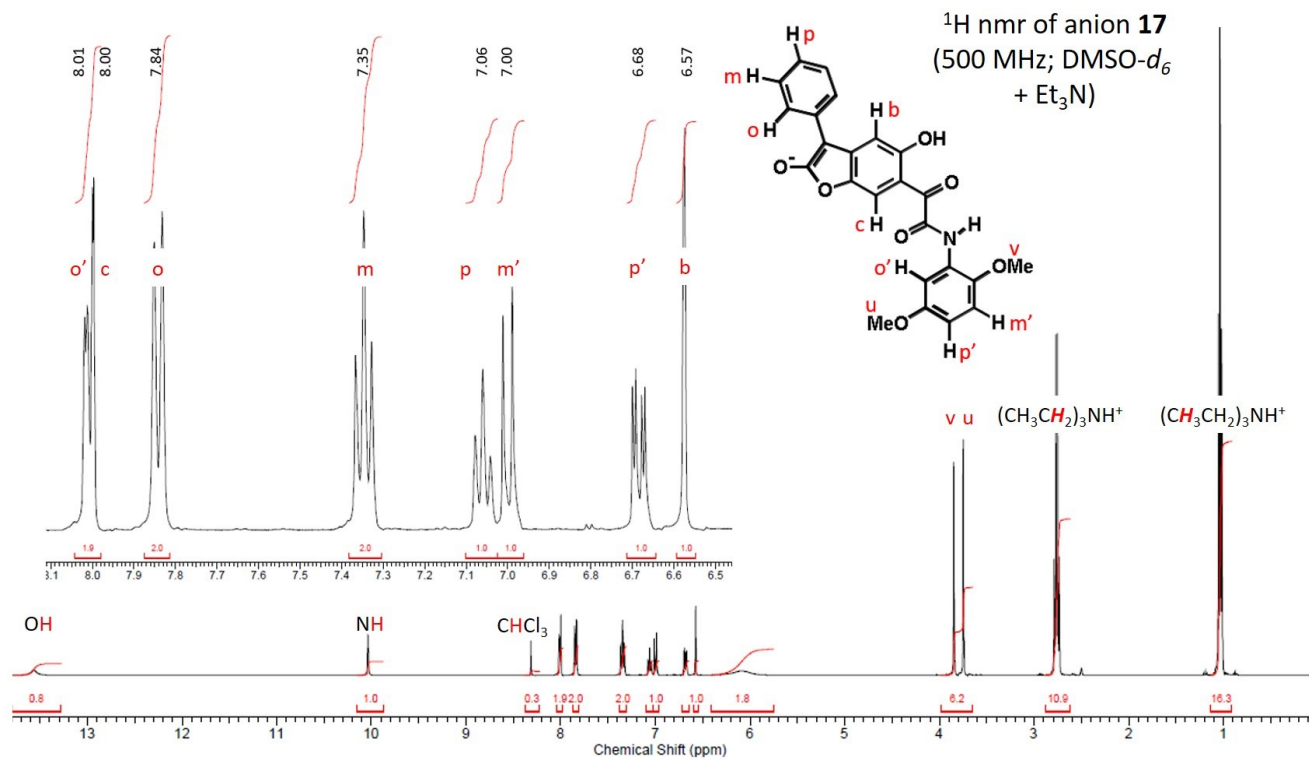

HMQC correlations for **17** (DMSO- $d_6$ +Et $_3$ N)

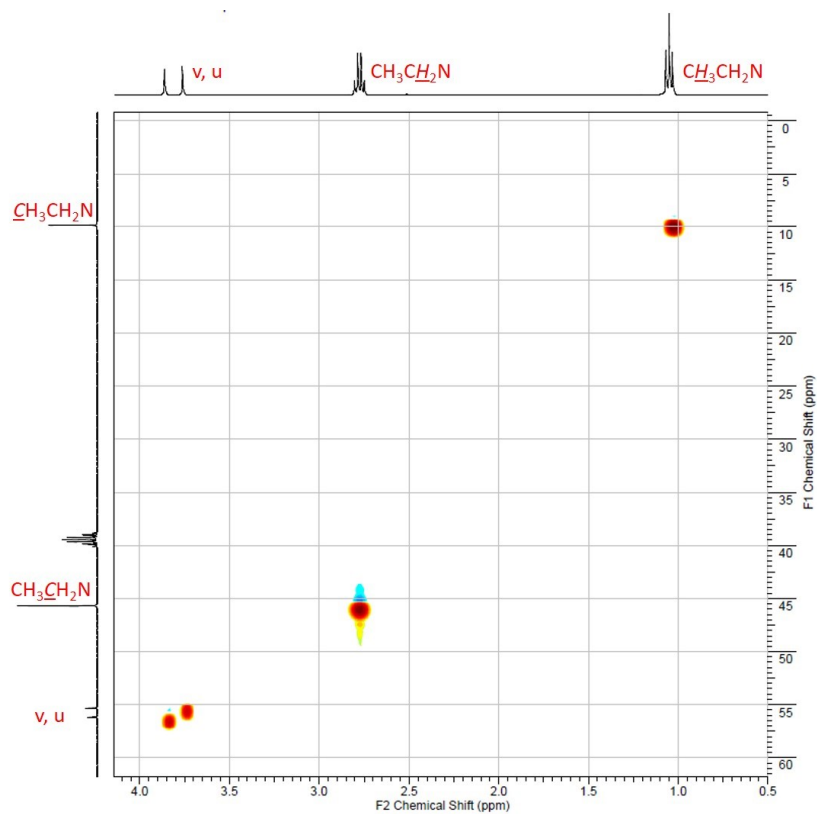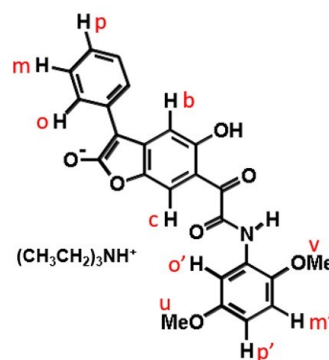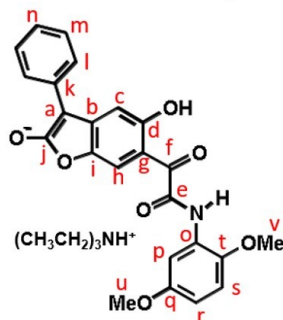

HMQC correlations for **17** (DMSO- $d_6$ +Et $_3$ N)

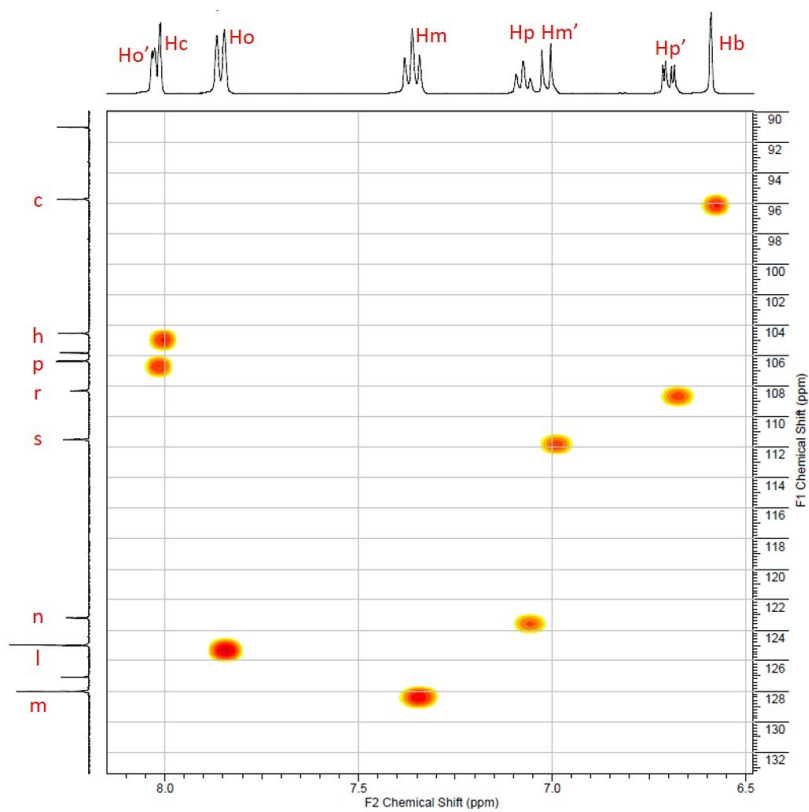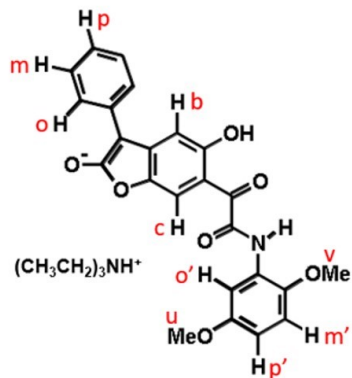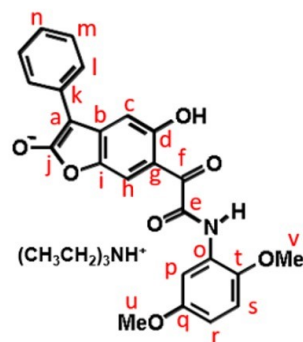

HMBC correlations for **17** (DMSO- $d_6$  + Et $_3$ N)

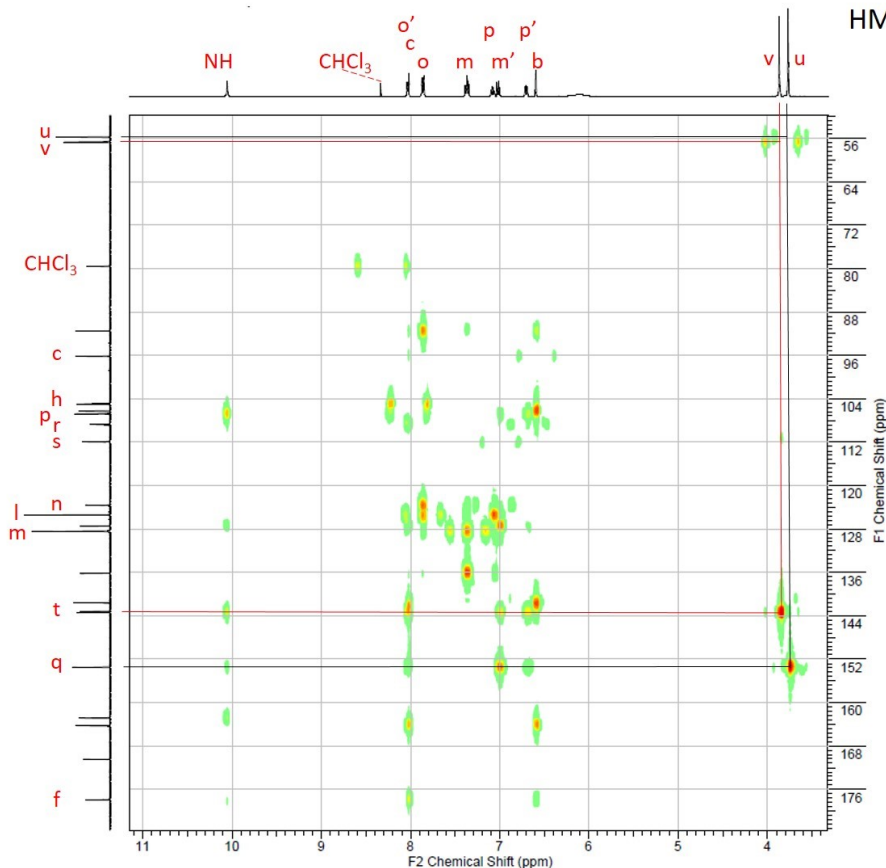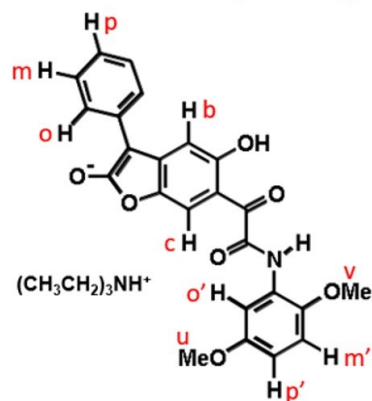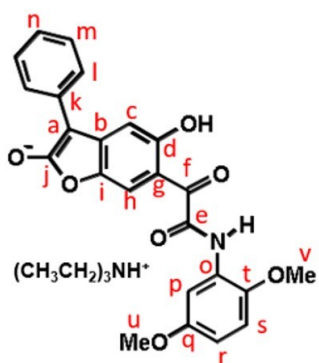

HMBC correlations for **17** (DMSO- $d_6$  + Et $_3$ N)

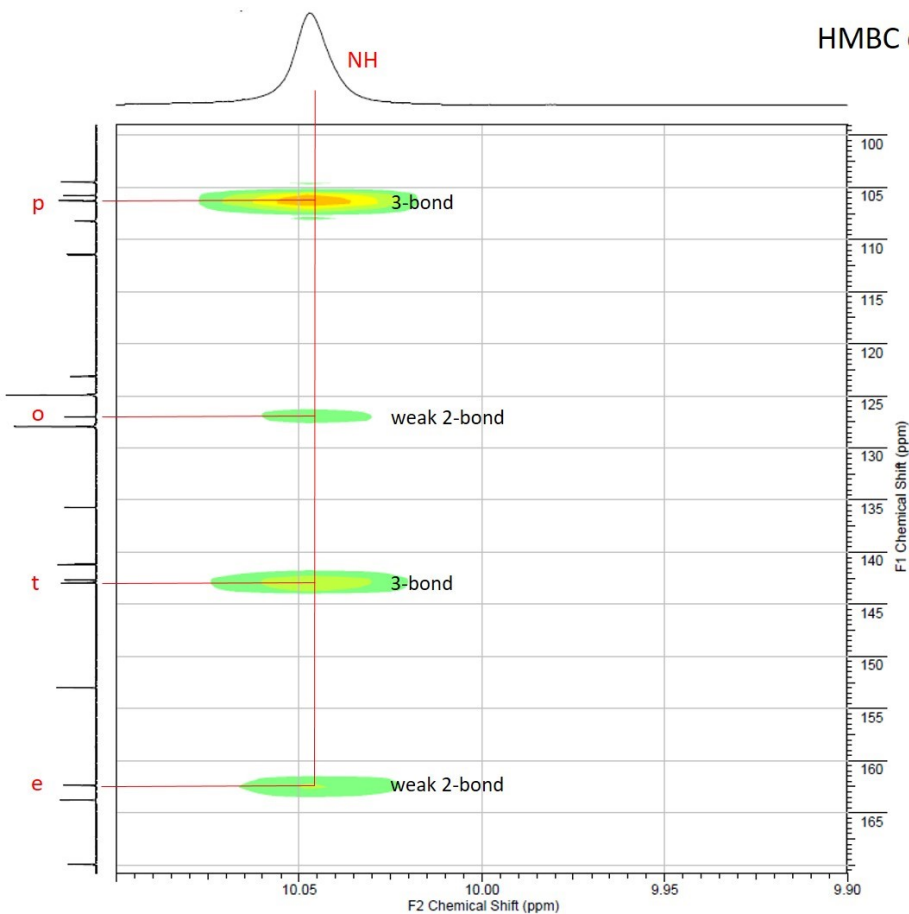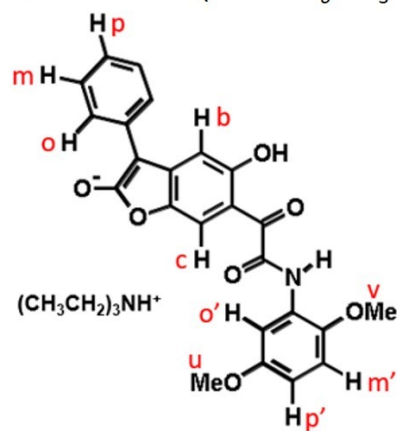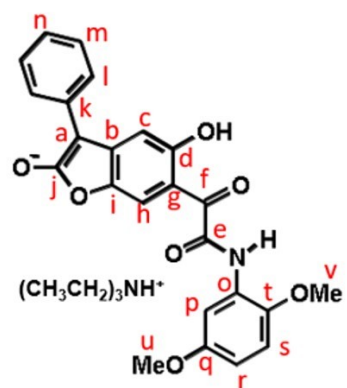

HMBC correlations for **17** (DMSO- $d_6$  + Et $_3$ N)

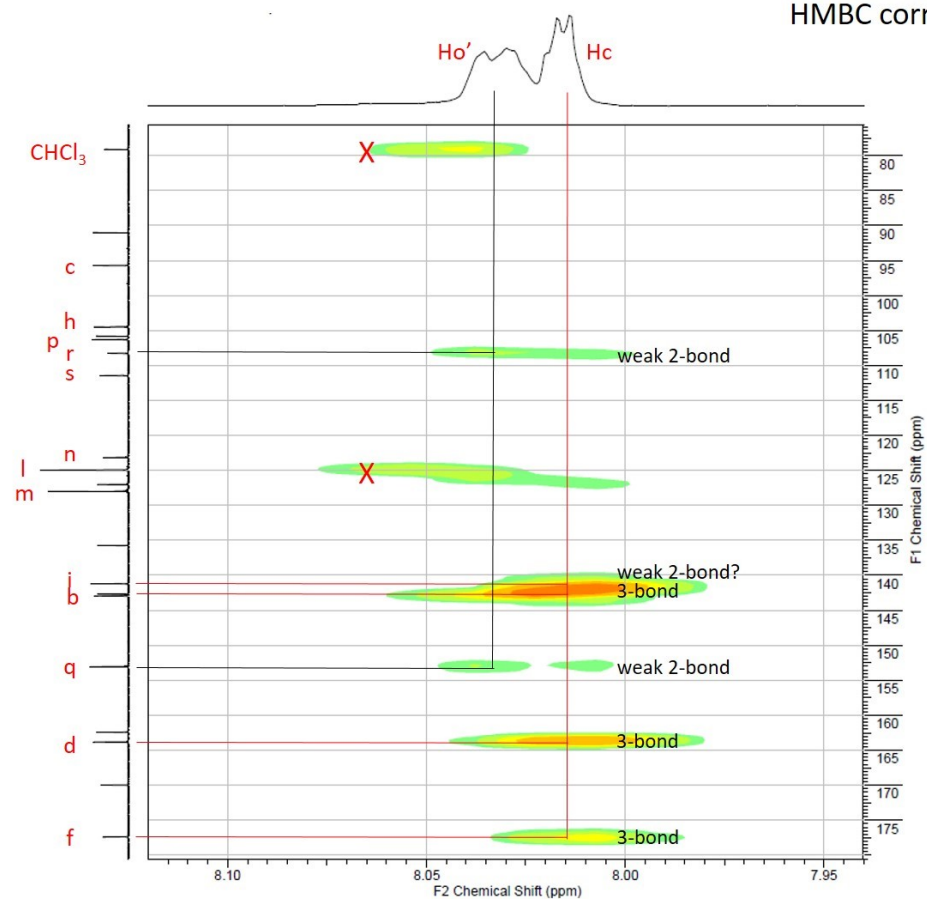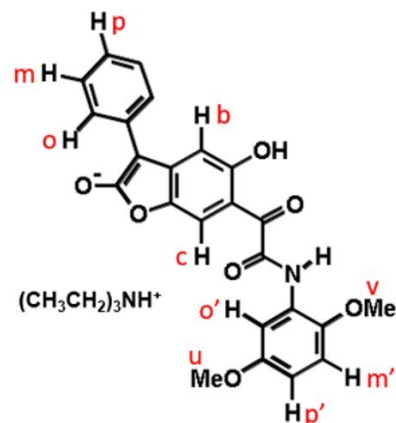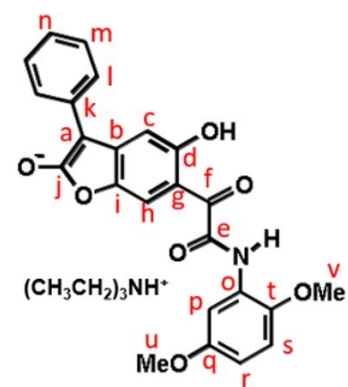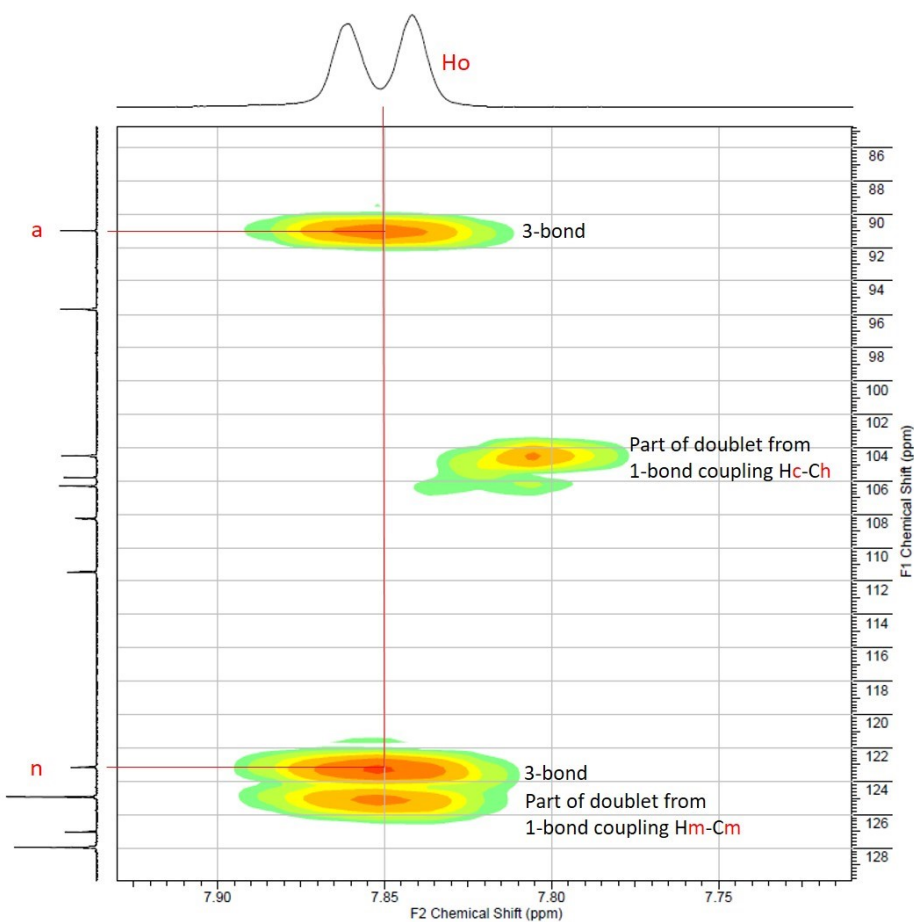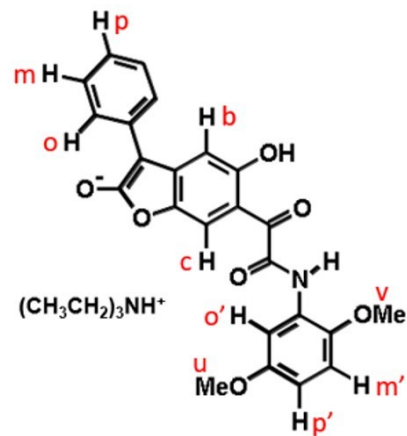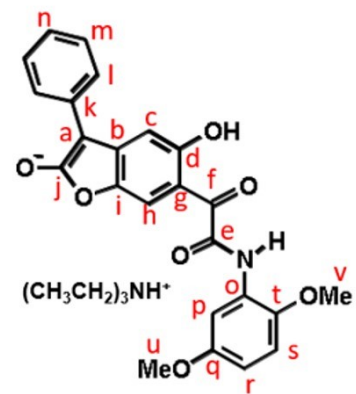

HMBC correlations for **17** (DMSO- $d_6$ +Et $_3$ N)

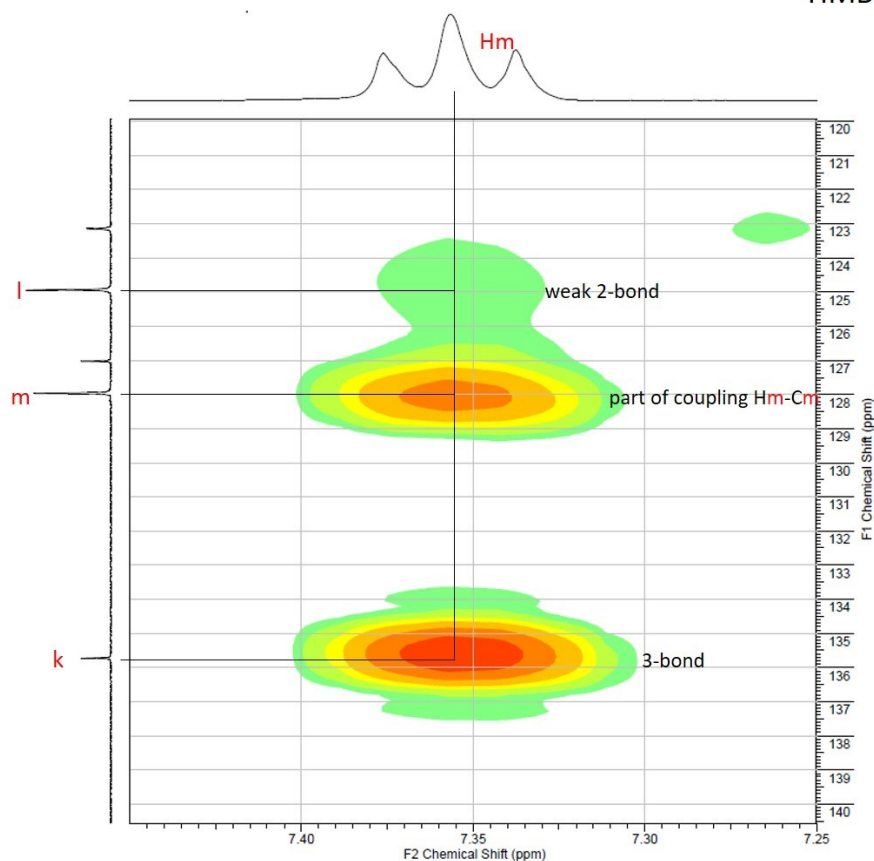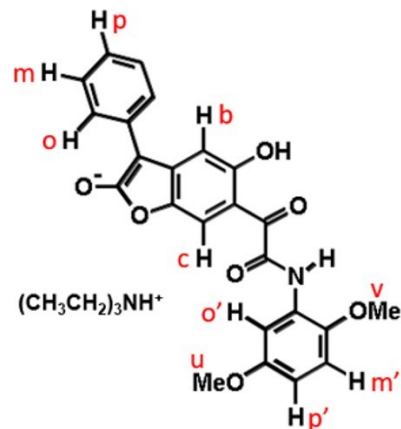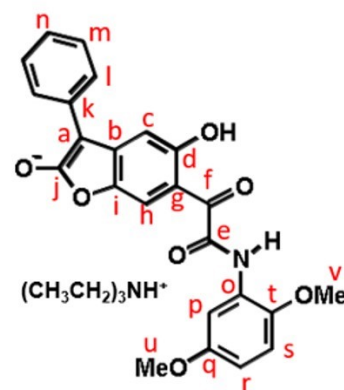

HMBC correlations for **17** (DMSO- $d_6$ +Et $_3$ N)

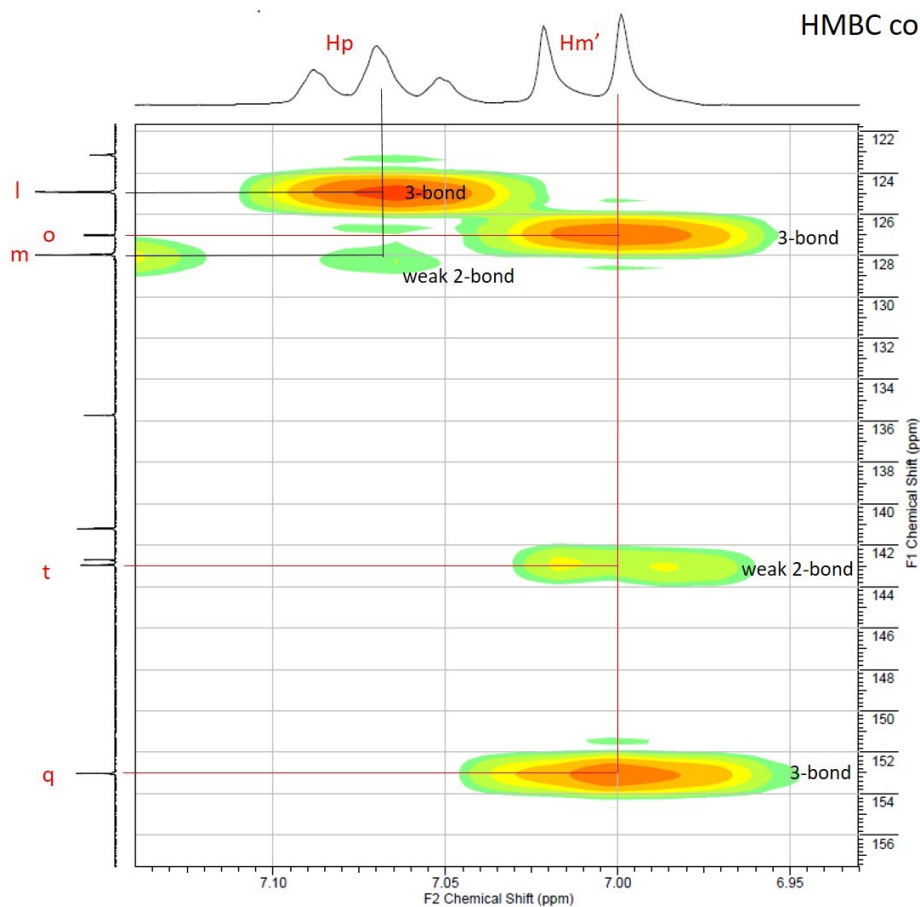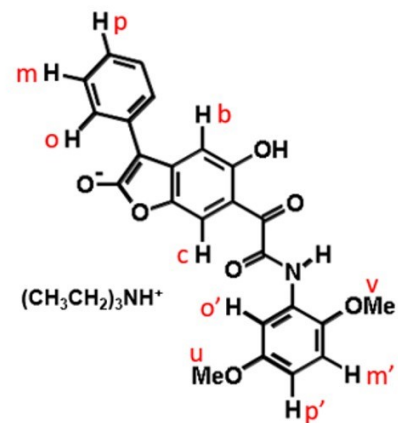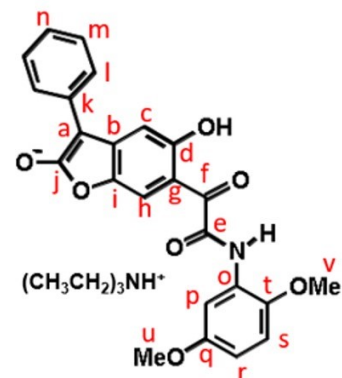

HMBC correlations for **17** (DMSO- $d_6$ +Et $_3$ N)

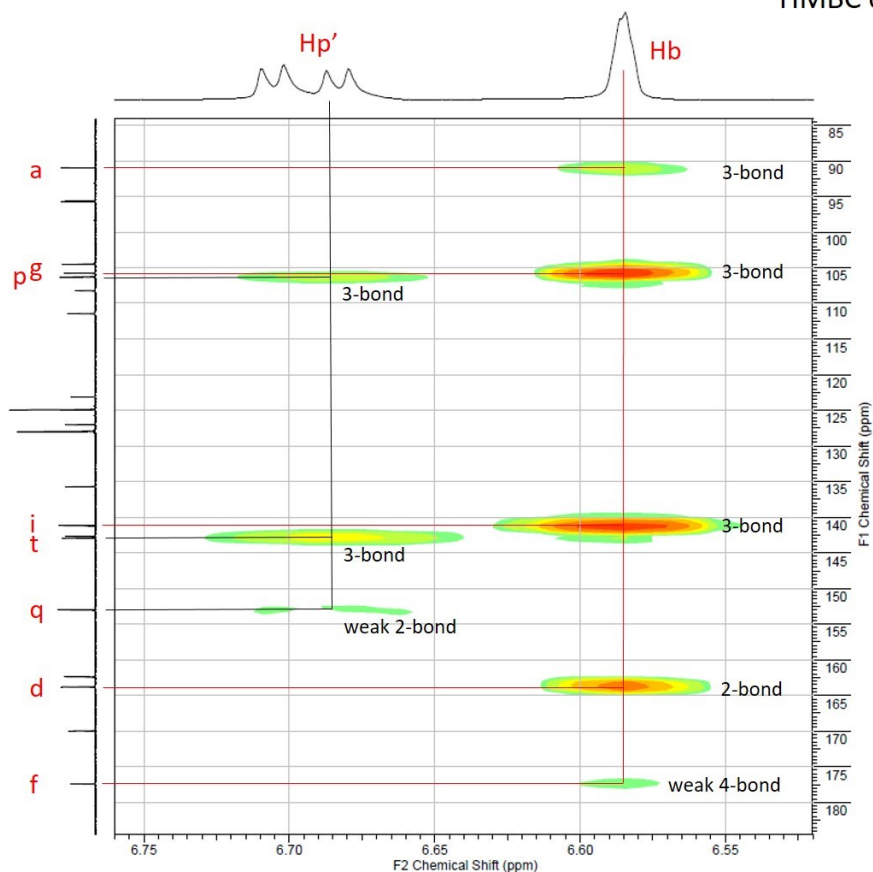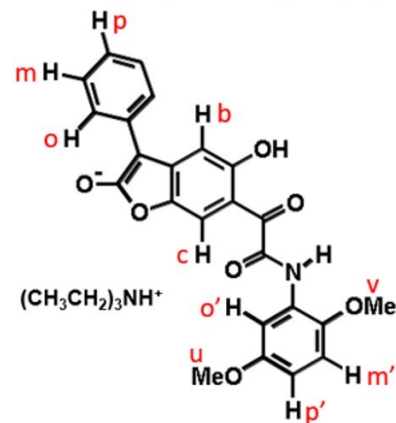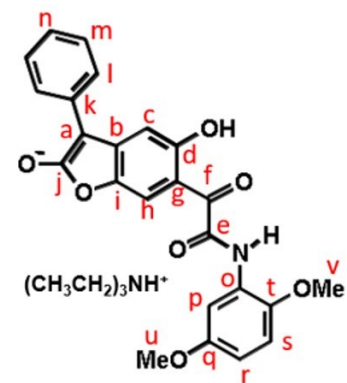

HMBC correlations for **17** (DMSO- $d_6$ +Et $_3$ N)

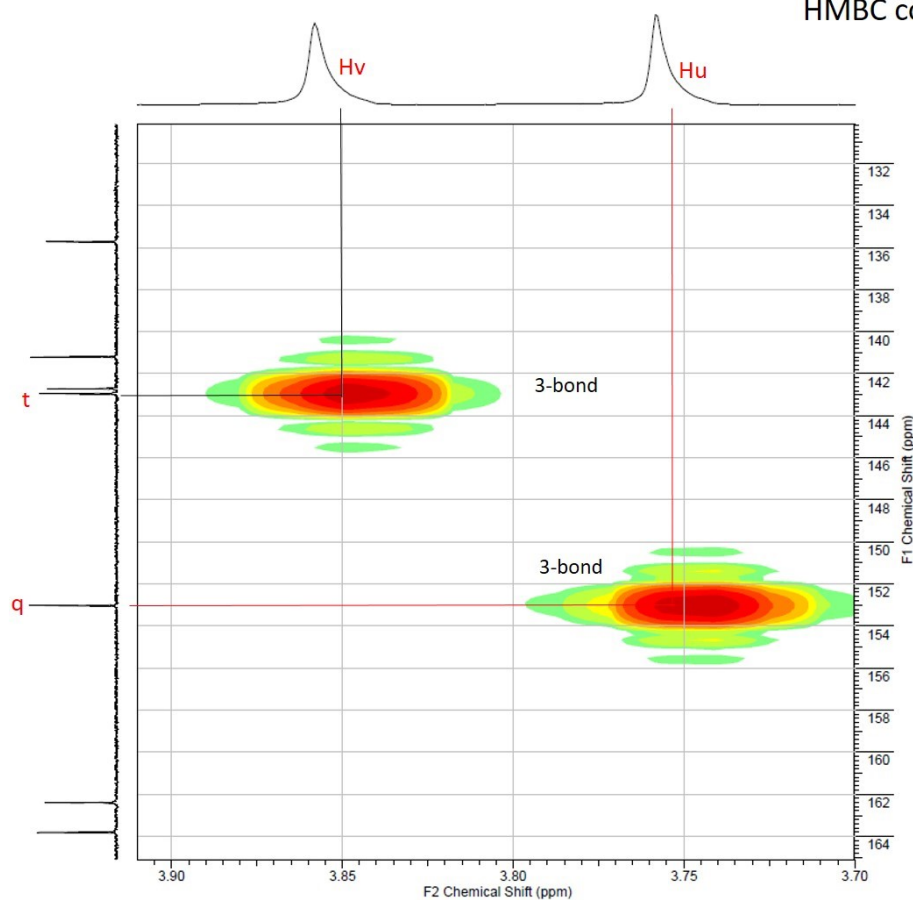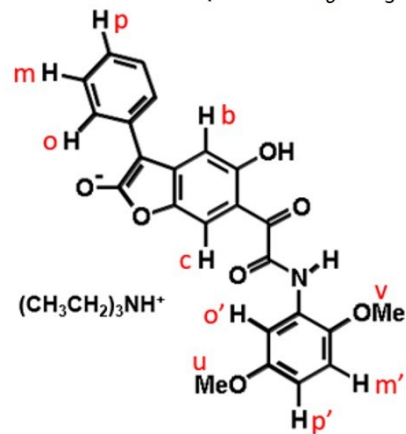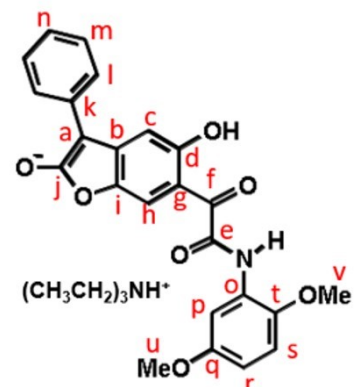

Summary of nmr assignments for **17** from HMQC and HMBC (DMSO-*d*<sub>6</sub>+Et<sub>3</sub>N)

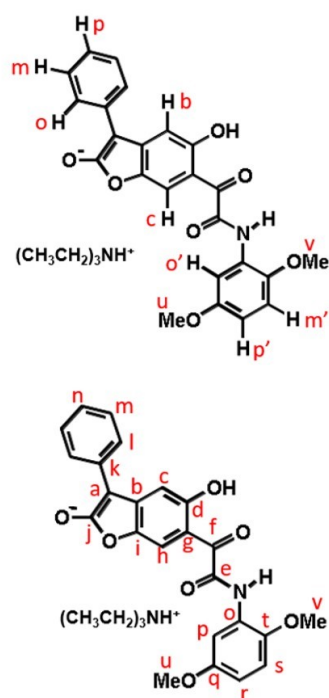

|            |                         | $\delta_{\text{H}}$ ppm & assignment |       |      |      |      |      |      |      |      |      |      |      |
|------------|-------------------------|--------------------------------------|-------|------|------|------|------|------|------|------|------|------|------|
|            |                         | 13.49                                | 10.00 | 8.01 | 8.00 | 7.84 | 7.35 | 7.06 | 7.00 | 6.68 | 6.57 | 3.85 | 3.75 |
|            |                         | OH                                   | NH    | Ho'  | Hc   | Ho   | Hm   | Hp   | Hm'  | Hp'  | Hb   | Hv   | Hu   |
| Assignment | $\delta_{\text{C}}$ ppm |                                      |       |      |      |      |      |      |      |      |      |      |      |
| u          | 55.36                   |                                      |       |      |      |      |      |      |      |      |      |      | HMQC |
| v          | 56.25                   |                                      |       |      |      |      |      |      |      |      |      |      | HMQC |
| a          | 91.09                   |                                      |       |      | w    | X    | w    |      |      |      | X    |      |      |
| c          | 95.8                    |                                      |       |      |      |      |      |      |      |      | HMQC |      |      |
| h          | 104.58                  |                                      |       |      | HMQC |      |      |      |      |      | w?   |      |      |
| g          | 105.88                  |                                      |       |      |      |      |      |      |      |      | X    |      |      |
| p          | 106.4                   |                                      | X     | HMQC |      |      |      |      | w    | X    |      |      |      |
| r          | 108.35                  |                                      |       | X    |      |      |      |      |      | HMQC |      |      |      |
| s          | 111.55                  |                                      |       |      |      |      |      |      | HMQC |      |      | w    |      |
| n          | 123.24                  |                                      |       |      |      | X    |      | HMQC |      |      |      |      |      |
| l          | 125.04                  |                                      |       |      |      | HMQC | w    | X    |      |      |      |      |      |
| o          | 127.13                  |                                      | X     |      |      |      |      |      | X    |      |      |      |      |
| m          | 128.07                  |                                      |       |      |      |      | HMQC | w    |      |      |      |      |      |
| k          | 135.83                  |                                      |       |      |      | w    | X    | w    |      |      |      |      |      |
| i          | 141.3                   |                                      |       |      | X?   |      |      |      |      |      | X    |      |      |
| b          | 142.82                  |                                      |       |      | X    |      |      |      |      |      |      |      |      |
| t          | 143.05                  |                                      | w     |      |      |      |      |      | X    | X    |      | X    |      |
| q          | 153.12                  |                                      | X     | w    |      |      |      |      | X    | w    |      |      | X    |
| e          | 162.5                   |                                      | X     |      |      |      |      |      |      |      |      |      |      |
| d          | 163.92                  |                                      |       |      | X    |      |      |      |      |      | X    |      |      |
| j          | 170.09                  |                                      |       |      |      |      |      |      |      |      |      |      |      |
| f          | 177.51                  |                                      | w     |      | X    |      |      |      |      |      | w    |      |      |

<sup>1</sup>H nmr spectrum assigned initially by inspection; Hb/Hc and Hu/Hv differentiated by HMBC correlations  
HMBC: X = correlation; w = weak correlation; ? = unreliable: possible overlap with adjacent correlation



*N*-(2,5-dimethoxyphenyl)-2-(5-hydroxy-3-phenyl-2-trimethylsilylmethoxy-1-benzofuran-6-yl)-2-oxoacetamide (**12**) and *N*-(2,5-dimethoxyphenyl)-2-(5-hydroxy-2-methoxy-3-phenyl-1-benzofuran-6-yl)-2-oxoacetamide (**13**)

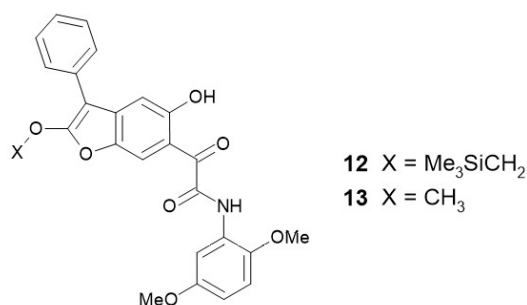

Amide **8** (0.5g, 1.15mmol) in toluene (50ml) was brought to 40°C. TMS-Diazomethane (0.5ml, 3.45mmol) was added dropwise. After 3hrs the reaction mixture was brought to room temperature and stirred in methanol (20ml) overnight. TLC revealed 2 closely running yellow spots as products, and no starting material. The solvent was evaporated and the major product isolated by column chromatography to give **12** as a yellow oil. <sup>1</sup>H NMR (400 MHz, CDCl<sub>3</sub>) δ<sub>H</sub> ppm 0.19 (s, 9H, Me<sub>3</sub>Si), 3.85 (s, 3H, OMe), 3.92 (s, 3H, OMe), 4.31 (s, 2H, SiCH<sub>2</sub>), 6.69 (dd *J* = 8.83, 2.84, 1H, *H<sub>p</sub>'*), 6.88 (d *J* = 8.83, 1H, *H<sub>m</sub>'*), 7.22 (s, 1H, *H<sub>b</sub>*), 7.29 (t *J* = 7.88, 1H, *H<sub>p</sub>*), 7.45 (t *J* = 7.88, 2H, *H<sub>m</sub>*), 7.66 (d *J* = 7.25, 2H, *H<sub>o</sub>*), 8.25 (d *J* = 2.84, 1H, *H<sub>o</sub>'*), 9.01 (s, 1H, *H<sub>c</sub>*), 9.75 (s, 1H, NH), 12.09 (s, 1H, OH). <sup>13</sup>C NMR (100 MHz, DMSO-*d*<sub>6</sub>) δ<sub>C</sub> ppm -3.30 (Me<sub>3</sub>Si), 55.46, 56.31, 58.71, 66.53, 93.36, 104.31, 108.33, 109.27, 112.23, 125.32, 126.76, 127.05, 128.20, 128.84, 128.89, 130.35, 130.58, 141.16, 144.06, 152.96, 158.55, 188.03 (C<sub>f</sub>). λ<sub>max</sub> (acetone) 394nm. IR (CHCl<sub>3</sub>) ν<sub>max</sub> cm<sup>-1</sup> 3400 (NH), 2920 (br, OH), 1688 (amide), 1598 (H-bonded aryl ketone), 1528. HRMS *m/z* Calcd for C<sub>28</sub>H<sub>29</sub>NO<sub>7</sub>Si [M+H<sup>+</sup>]: 520.1792. Found: 520.1785

The minor product was not isolated pure. It is assigned the structure of the methyl ether analogue (**13**) of the TMS-substituted methyl ether (**12**) on the basis of the <sup>1</sup>H NMR spectra of enriched fractions; see example below. In a roughly 50/50 mixture of **12** and **13** the following features of the NMR spectrum (CDCl<sub>3</sub>) stand out, and overall are consistent with the assigned methyl ether structure (**13**):

- A second OH resonance is observed of near equal integrated intensity (δ<sub>H</sub> (**12**) 12.09, (**13**) 12.05 ppm)
  - A second H<sub>c</sub> resonance is observed of near equal integrated intensity (δ<sub>H</sub> (**12**) 9.01, (**13**) 9.05 ppm)
  - All other aromatic <sup>1</sup>H resonances overlap more or less exactly
  - The TMSCH<sub>2</sub> resonance (δ<sub>H</sub> (**12**) 4.31 ppm) is accompanied by another (δ<sub>H</sub> (**13**) 4.24 ppm) of 50% higher integrated intensity, assigned CH<sub>3</sub>O
  - The remaining TMS resonance (δ<sub>H</sub> (**12**) 0.19 ppm) is 50% intensity of that expected for pure **12** based on ArH intensities
- Additionally <sup>1</sup>H NMR spectra of different ratios of **12** and **13** gave relative peak intensities consistent with the above assignment.

Small scale attempts to desilylate **12** to give **13** failed:

- 2N HCl gave decomposition to amide (**8**) and other products
- Methane sulfonic acid (trace) gave no conversion
- Biphasic Me<sub>4</sub>N<sup>+</sup>Cl<sup>-</sup>/KF in water and **12** in DCM gave no conversion
- PhEt<sub>3</sub>N<sup>+</sup>Cl<sup>-</sup> in DCM plus KF plus one drop of water gave no conversion.

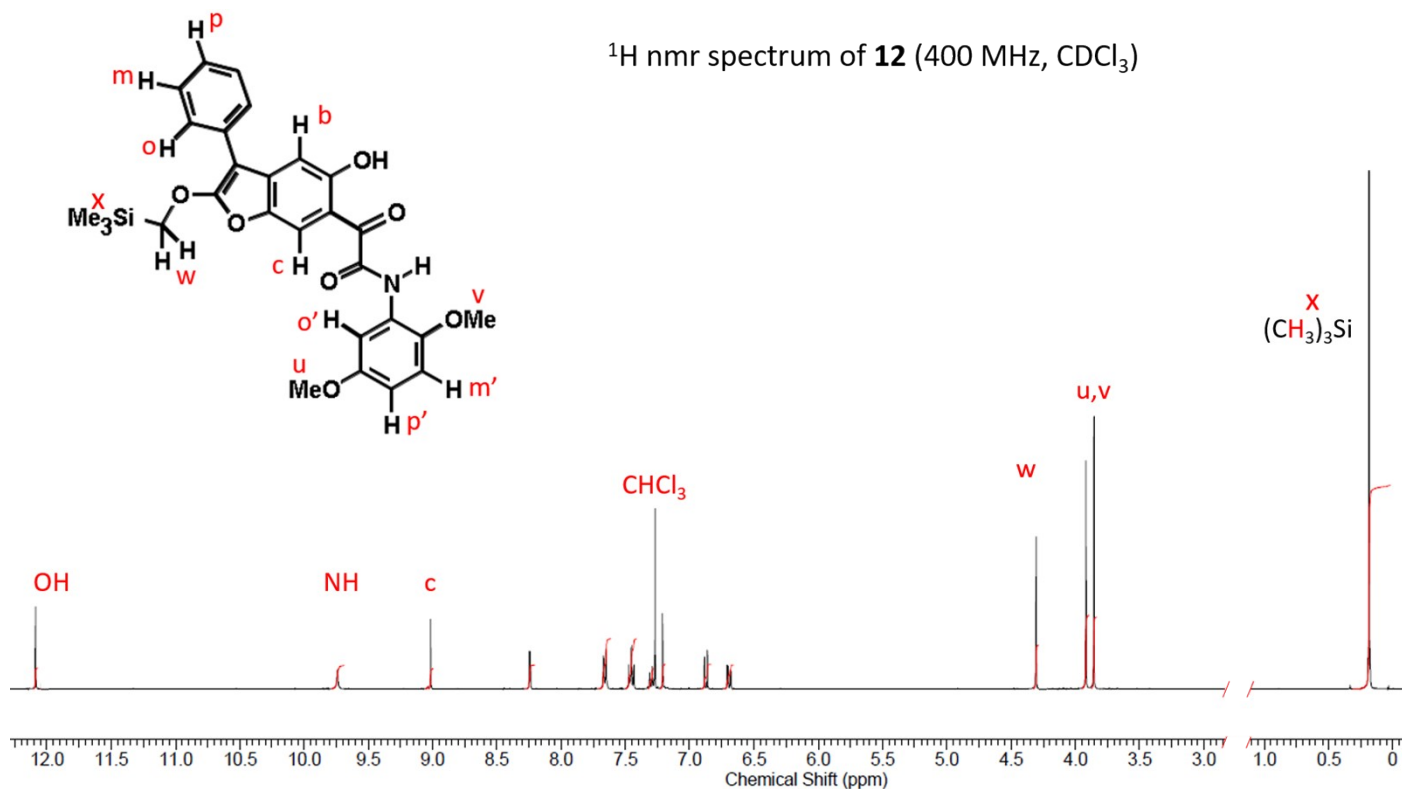

<sup>1</sup>H nmr spectrum of **12** (400 MHz, CDCl<sub>3</sub>)  
Expansions

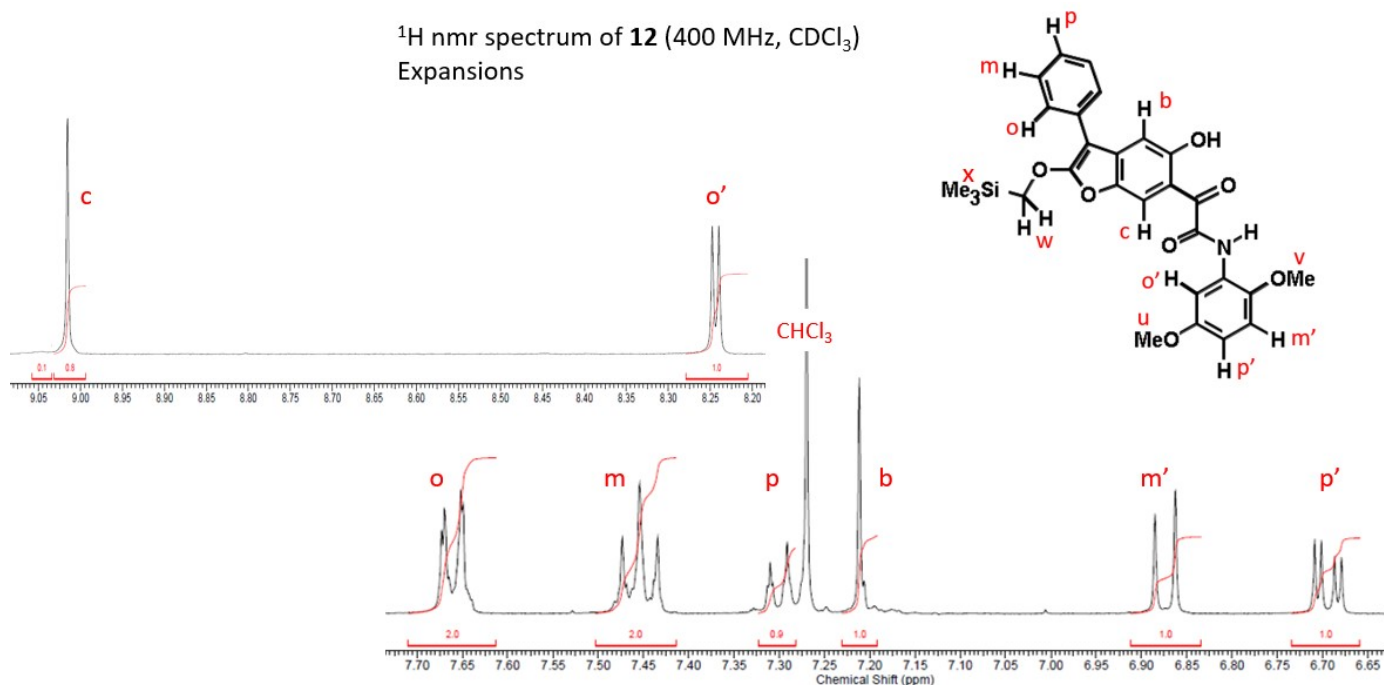

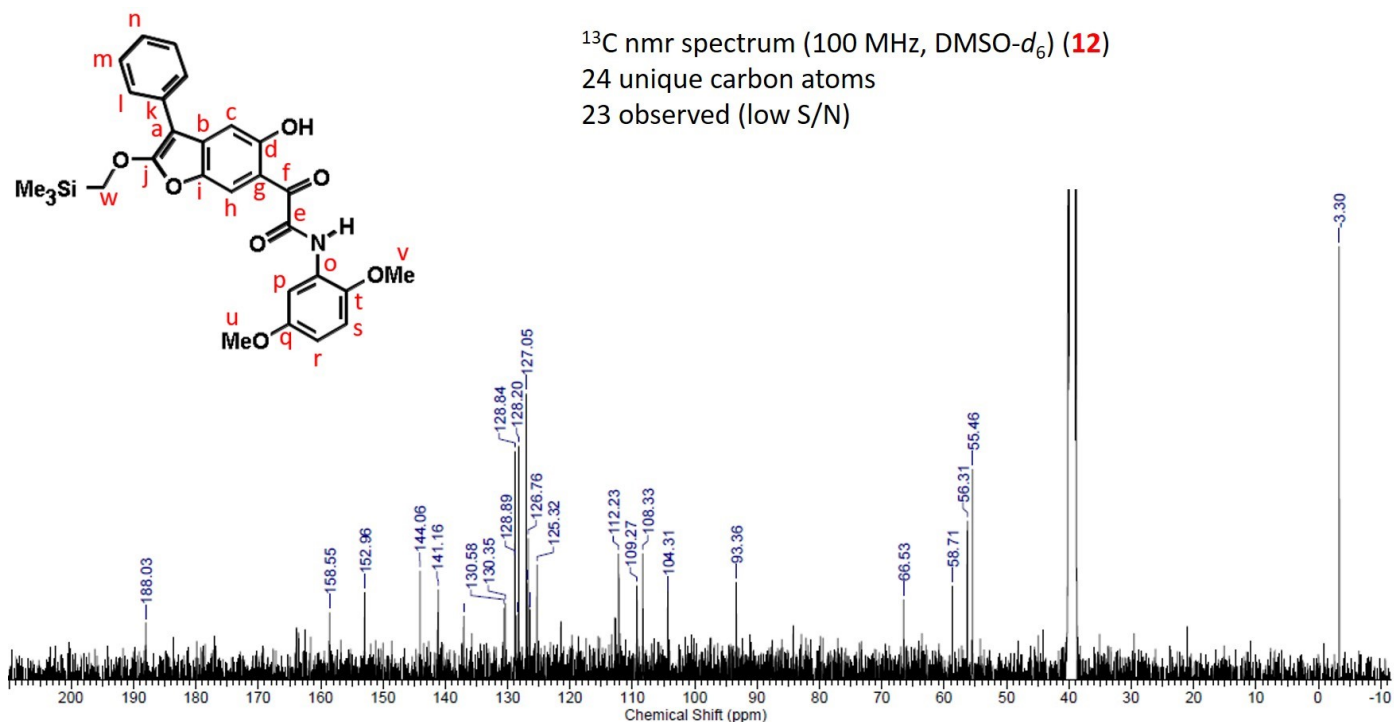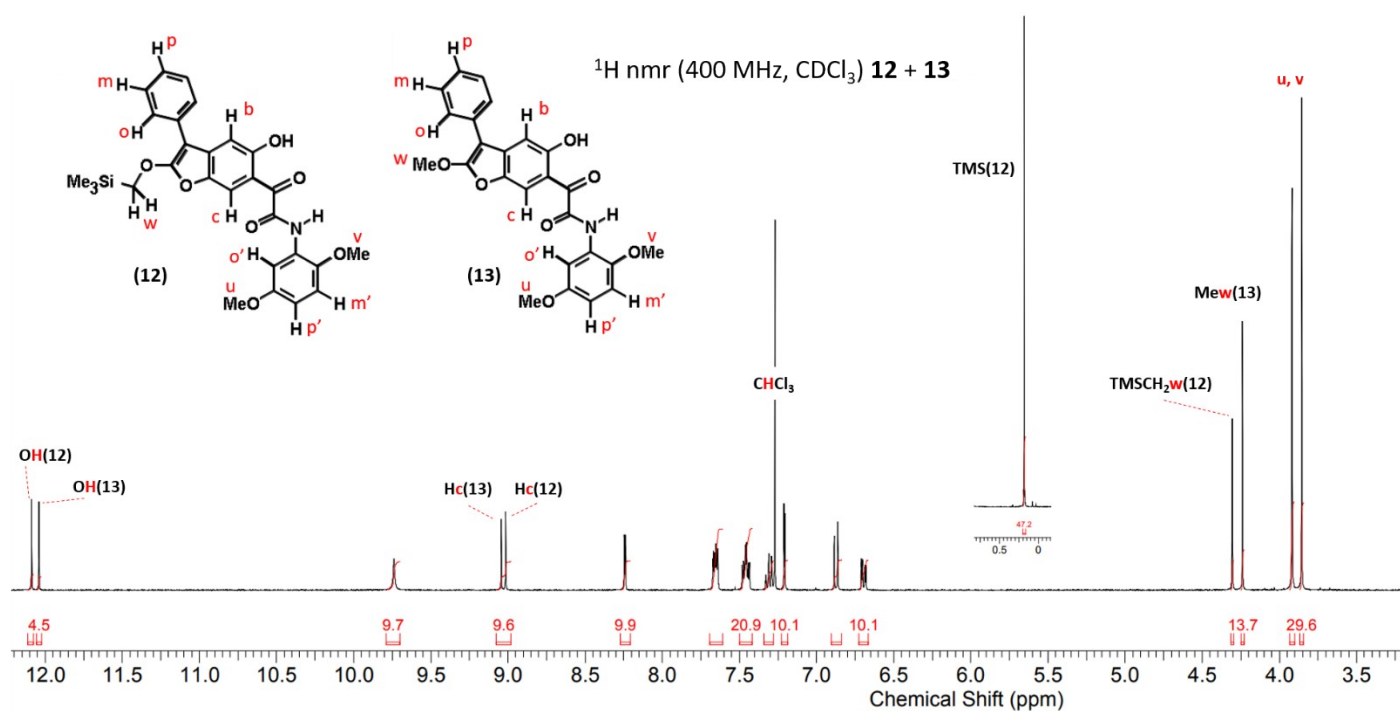

*N*-(2,5-dimethoxyphenyl)-2-(3-benzyl-5-hydroxy-2-oxo-3-phenyl-2,3-dihydro-1-benzofuran-6-yl)-2-oxoacetamide (**14**) and *N*-(2,5-dimethoxyphenyl)-2-[3-benzyl-5-(benzyloxy)-2-oxo-3-phenyl-2,3-dihydro-1-benzofuran-6-yl]-2-oxoacetamide (**15**)

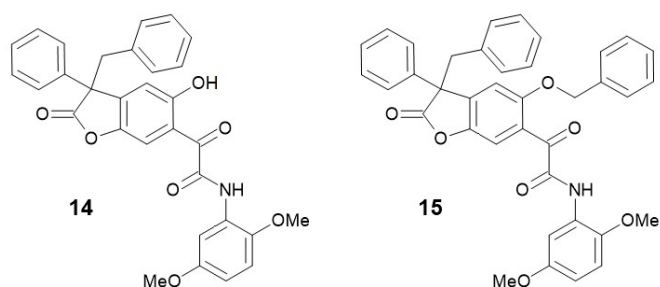

A mixture of amide **8** (1g, 2.30 mmol), benzyl bromide (3.4 ml, 27.6 mmol) and potassium carbonate (0.4g, 2.76 mmol) was stirred in DMF (10ml) at room temperature for 24 hrs. Water (50ml) and DCM (50ml) were added to the reaction mixture. The organic layer was washed with water and dried over magnesium sulphate. The DCM was evaporated and the resulting mixture was stirred in cyclohexane (3ml) and the cyclohexane decanted off. Remaining solvent was evaporated under vacuum to give a yellow liquid which was a mixture of two major products. The products were separated by flash column chromatography to give two yellow oils **14** (900mg, 75%) and **15** (200mg, 15%).

**14**:  $^1\text{H NMR}$  (500 MHz,  $\text{CDCl}_3$ )  $\delta_{\text{H}}$  ppm 3.48 (d,  $J = 13.2$ , 1H,  $\text{H}_y$ ), 3.72 (d,  $J = 13.2$ , 1H,  $\text{H}_x$ ), 3.73 (s, 3H, OMe), 3.82 (s, 3H, OMe), 6.61 (dd,  $J = 8.98, 2.99$ , 1H,  $\text{H}_p'$ ), 6.78 (d,  $J = 9.14$ , 1H,  $\text{H}_m'$ ), 6.88 (m, 2H, ArH), 6.89 (s, 1H,  $\text{H}_b$ ), 7.0-7.5 (m, 8H, ArH), 8.04 (d,  $J = 3.15$ , 1H,  $\text{H}_o'$ ), 8.34 (s, 1H,  $\text{H}_c$ ), 9.51 (s, 1H, NH), 11.91 (s, 1H, OH).  $^{13}\text{C NMR}$  (125 MHz,  $\text{CDCl}_3$ )  $\delta_{\text{C}}$  ppm 43.39 (Cx), 54.81 (OMe), 55.28 (OMe), 57.35 (Ca), 105.16, 109.45, 109.97, 112.54, 114.99, 115.51, 125.34, 125.74, 126.50, 127.33, 127.45, 128.11, 128.94, 133.04, 136.37, 140.43, 142.00, 144.37, 152.74, 152.67, 160.64, 175.55, 187.52 (Cf).  $\lambda_{\text{max}}$  (acetone) 390 nm. IR ( $\text{CHCl}_3$ )  $\nu_{\text{max}}$  ( $\text{cm}^{-1}$ ) 3346 (NH), 2960 (br, OH), 1805 (lactone), 1692 (amide), 1599 (H-bonded ketone), 1527. HRMS (EI/CI)  $m/z$  Calcd for  $\text{C}_{31}\text{H}_{25}\text{NO}_7$  [ $\text{M}+\text{H}^+$ ]: 524.1709. Found: 524.1714.

**15**:  $^1\text{H NMR}$  (500 MHz,  $\text{CDCl}_3$ )  $\delta_{\text{H}}$  ppm 3.49 (d,  $J = 15$ , 1H,  $\text{H}_y$ ), 3.59 (d,  $J = 15$ , 1H,  $\text{H}_x$ ), 3.71 (s, 3H, OMe), 3.77 (s, 3H, OMe), 4.96 (s, 2H,  $\text{H}_z, \text{H}_z'$ ), 6.59 (dd,  $J = 8.99, 2.99$ , 1H,  $\text{H}_p'$ ), 6.63 (s, 1H,  $\text{H}_b$ ), 6.71 (d,  $J = 7.25$ , 2H, *ortho*-ArH), 6.76 (d,  $J = 9.14$ , 1H,  $\text{H}_m'$ ), 7.0-7.5 (m, 13H, ArH), 7.22 (s, 1H,  $\text{H}_c$ ), 8.04 (d,  $J = 3.15$ , 1H,  $\text{H}_o'$ ), 8.88 (s, 1H, NH).  $\lambda_{\text{max}}$  (acetone) 342 nm. IR ( $\text{CHCl}_3$ )  $\nu_{\text{max}}$  ( $\text{cm}^{-1}$ ) 3350 (NH), 1802 (lactone), 1686, 1680 (amide, non-H-bonded ketone), 1600, 1536. HRMS (EI/CI)  $m/z$  Calcd for  $\text{C}_{38}\text{H}_{31}\text{NO}_7$  [ $\text{M}+\text{H}^+$ ]: 614.2179. Found: 614.2171.

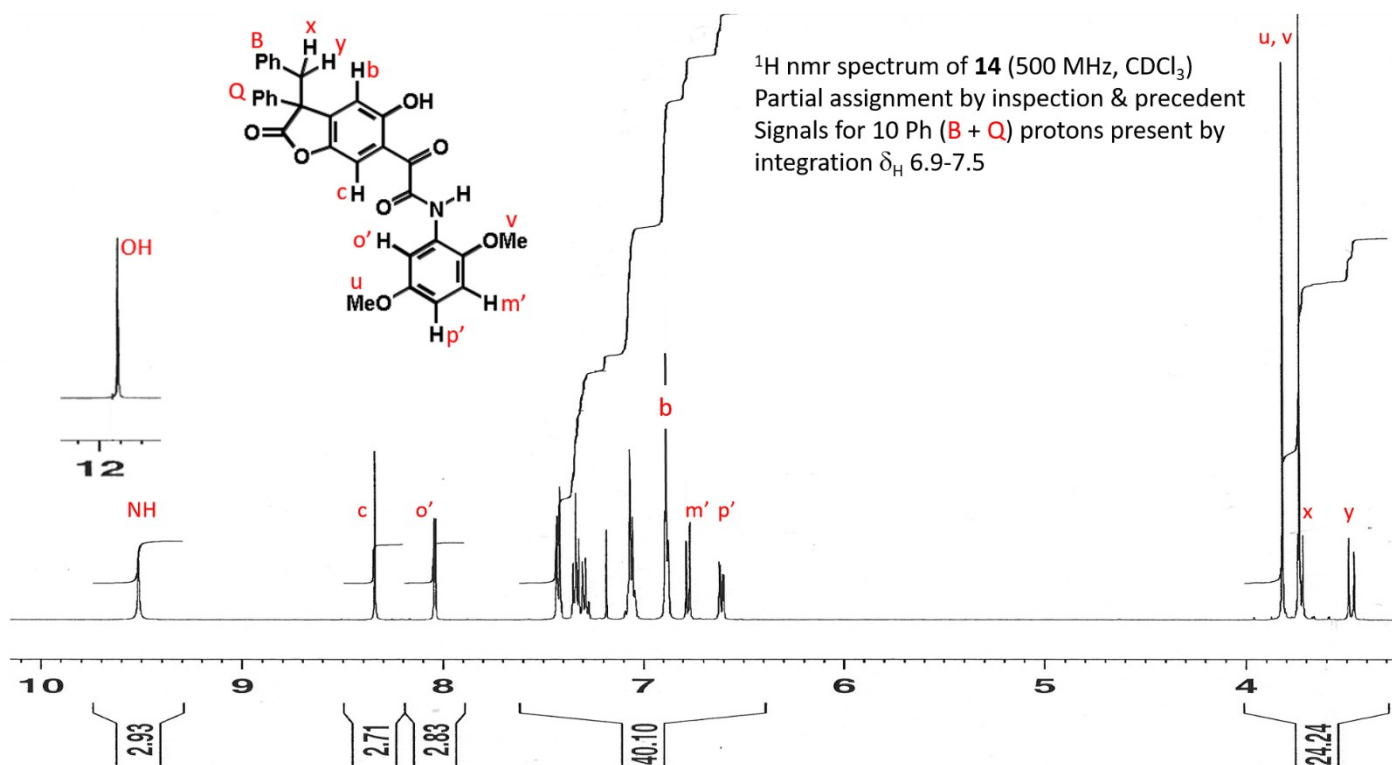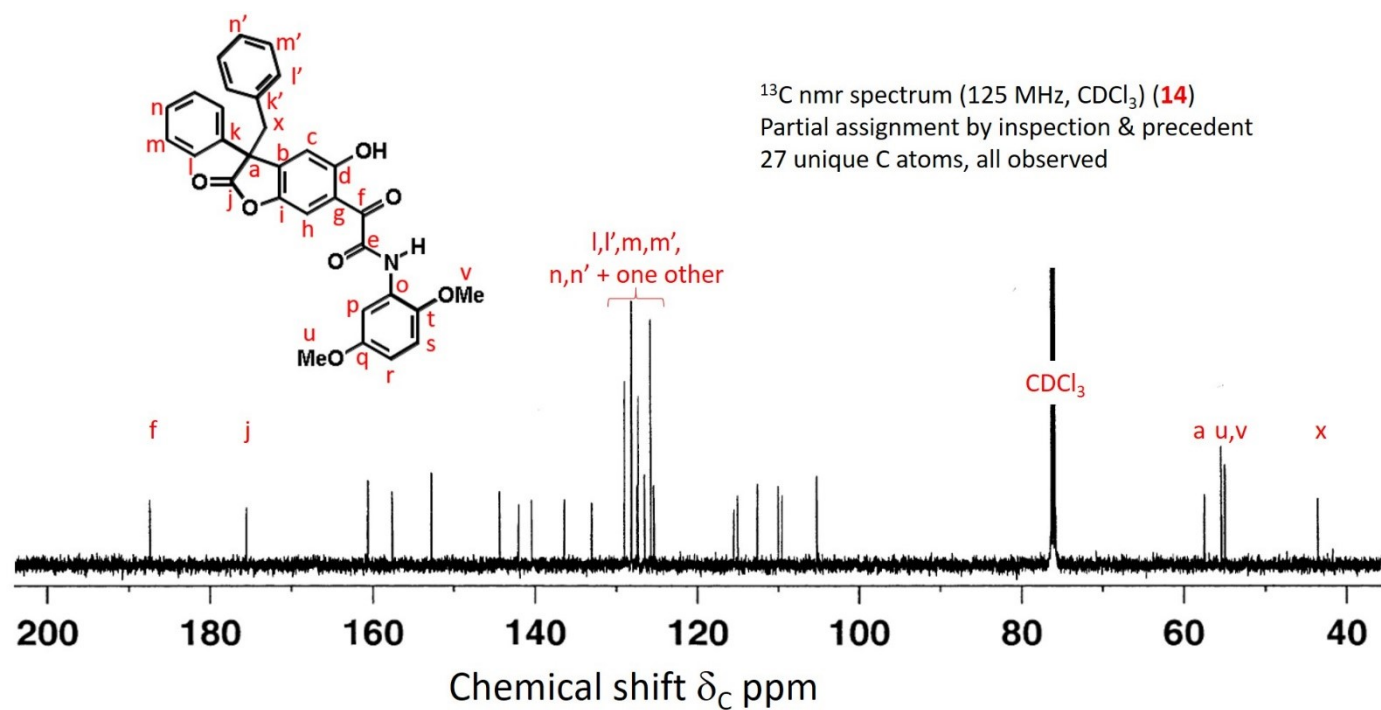

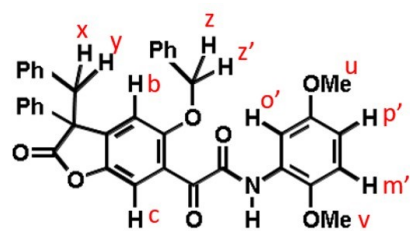

$^1\text{H}$  nmr spectrum of **15** (500 MHz,  $\text{CDCl}_3$ )  
Assignment by inspection & precedent  
No signal at  $\delta_{\text{H}} > 9$ : phenol OH absent  
13 Ph proton signals present by integration  
at  $\delta_{\text{H}}$  7.1-7.5

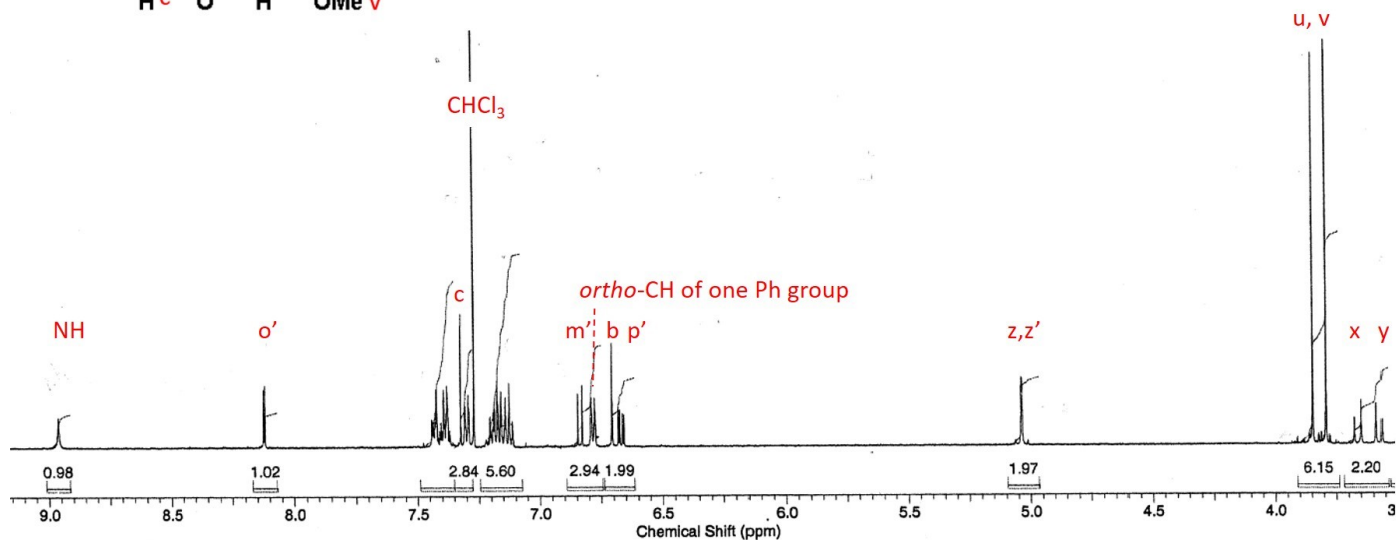

**Visible/NIR spectra**

Solutions were prepared from dry solvents with sample concentrations at  $10^{-5}$  M, aimed at absorbance values, A, below unity. Graphics below were manipulated to show spectra with roughly equal absorbances.

**BDF dye 1b and its conjugate base**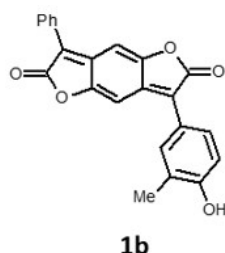

The discussion in the main text of the visible-NIR spectra of **1b** gave qualitative arguments for conjugate base aggregation in solution, with a greater tendency for aggregation in less polar solvents. A preliminary quantitative exploration of solvent-dependent aggregation has been based on available data; see Table below. No attempt has been made to carry out a rigorous study. The following graphic shows a plot which relates the ratio of absorbances in the NIR of the conjugate base of dye **1b** to the solvent polarity as represented by the Kirkwood-Onsager reaction field parameter  $g(\epsilon)$  derived from solvent relative permittivity ( $\epsilon$ ) as  $g(\epsilon) = (\epsilon - 1)/(\epsilon + 1)$ .

| Solvent           | Reaction field parameters <sup>a</sup> |               |        |                      | Additive | $\lambda_{\max}$ (nm) and A <sup>b</sup> |        |        | Ratio <sup>c</sup> |
|-------------------|----------------------------------------|---------------|--------|----------------------|----------|------------------------------------------|--------|--------|--------------------|
|                   | $\epsilon$                             | $g(\epsilon)$ | $f(n)$ | $g(\epsilon) - f(n)$ |          | Vis                                      | NIR770 | NIR830 | A830/A770          |
| DMSO <sup>d</sup> | 48.71                                  | 0.958         | 0.372  | 0.59                 | DBU      |                                          | 770    | 831    |                    |
|                   |                                        |               |        |                      |          | 0.86                                     | 2.00   | 2.33   |                    |
|                   |                                        |               |        |                      | None     | 529.5                                    | 770    | 834.5  |                    |
|                   |                                        |               |        |                      | 0.63     | 0.16                                     | 0.369  | 2.31   |                    |
|                   |                                        |               |        |                      | DBU      |                                          | 770    | 834    |                    |
|                   |                                        |               |        |                      |          | 0.61                                     | 1.429  | 2.34   |                    |
| TMSO              | 42.84                                  | 0.954         | 0.396  | 0.55                 | None     | 533                                      | 770    | 838    |                    |
|                   |                                        |               |        |                      |          | 0.38                                     | 0.25   | 0.58   | 2.32               |
| DMA               | 38.3                                   | 0.949         | 0.348  | 0.60                 | None     |                                          | 770    | 825    |                    |
|                   |                                        |               |        |                      |          | 0.89                                     | 2.00   | 2.25   |                    |
| NMP               | 32.98                                  | 0.940         | 0.367  | 0.57                 | None     | 530                                      | 770    | 834    |                    |
|                   |                                        |               |        |                      |          | 0.95                                     | 0.9    | 2.00   | 2.22               |
| DCM               | 9.02                                   | 0.800         | 0.339  | 0.46                 | DBU      |                                          | 770    | 825    |                    |
|                   |                                        |               |        |                      |          | 0.788                                    | 0.97   | 1.23   |                    |
| EtOAc             | 6.03                                   | 0.716         | 0.306  | 0.41                 | DBU      |                                          | 770    | 830    |                    |
|                   |                                        |               |        |                      |          | 0.71                                     | 0.44   | 0.62   |                    |

<sup>a</sup> Values from J.-L.M. Abboud and R. Notario, *Pure Appl. Chem.*, 1999, **71**, 645-718. See this reference and reference 7 of the main text for discussion of all these reaction field parameters.  $\epsilon$  is the solvent relative permittivity, and should not be confused with the wholly unrelated  $\epsilon_{\max}$ , the molar extinction coefficient referred to elsewhere in the main text and ESI.  $n$  is the solvent refractive index from which  $f(n) = (n^2 - 1)/(n^2 + 1)$ . <sup>b</sup> Absorbance values, A, are recorded in blue below the corresponding  $\lambda_{\max}$  values. In some cases they have been scaled to a maximum of A = 2. NIR770 and NIR830 are labels for the two main absorbances in the NIR. <sup>c</sup> The relative absorbances are given as ratios of values at the  $\lambda_{\max}$  near 830 nm (A830) and  $\eta\alpha\tau$  measured at 770 nm (A770). <sup>d</sup> Three measurements are recorded for DMSO, in different

batches of dry solvent, with and without DBU, at different concentrations. The relative absorbance ratios are essentially unchanged.

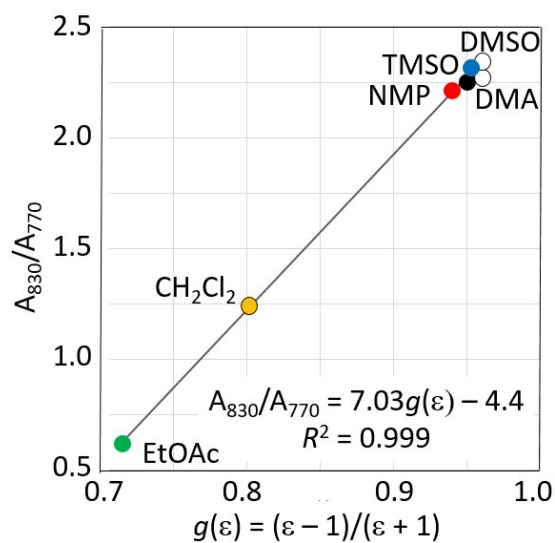

There is a clear relationship between the degree of aggregation (lower ratio) and reduced solvent polarity as reflected by  $g(\epsilon)$ . Plots of the absorbance ratios against alternative reaction field parameters show inferior trends; see below.

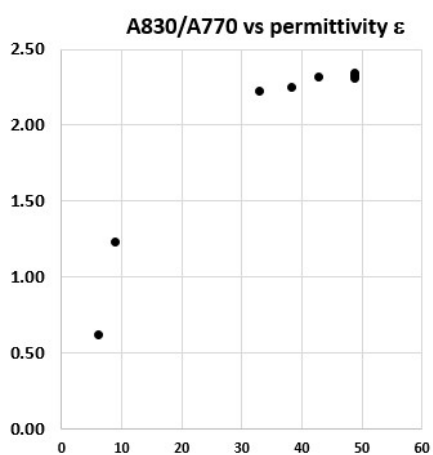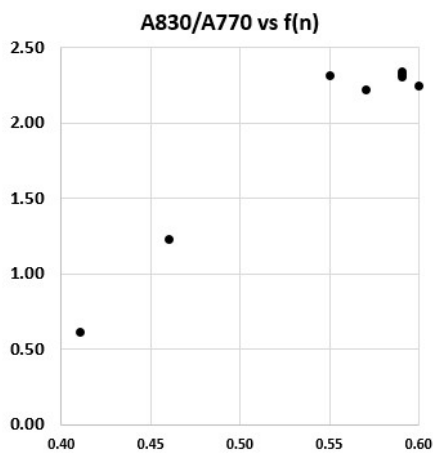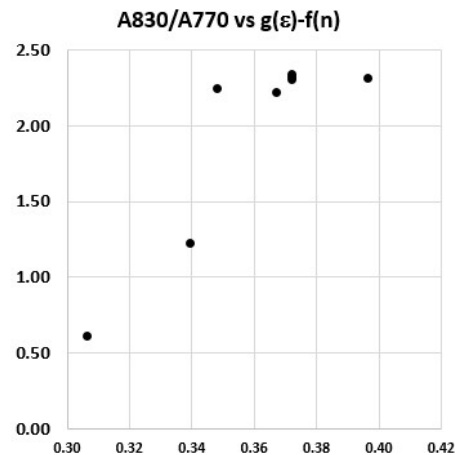



## BDF dye **1d** and its conjugate bases

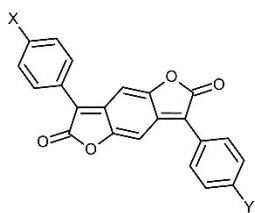

**1d** X = Y = OH  
**1d-cb1** X = OH, Y = O<sup>-</sup>  
**1d-cb2** X = Y = O<sup>-</sup>

Absorption data for this BDF dye and its deprotonated derivatives are included in Table 1 of the main text. The following Figure reproduces a series of visible-NIR spectra recorded in DMF.

- A is **1d** dissolved in dry DMF, showing maxima due to the parent dye and its mono-deprotonated conjugate base **1d-cb1**. The latter features a blue-shifted shoulder assigned to the aggregated anion.
- B shows the effect of DBU addition (2 equivalents) to give the dianion **1d-cb2**. Its blue-shifted shoulder is ambiguous. It may be due to aggregated dianion, or to mono-deprotonated **1d-cb1**.
- C Careful addition of one equivalent of acetic acid leads to **1d-cb1** plus an indication of formation of the parent dye **1d**.
- D The parent dye **1d** free from any conjugate base is generated by further addition of acetic acid, or by direct acidification of the base-free DMF solution.

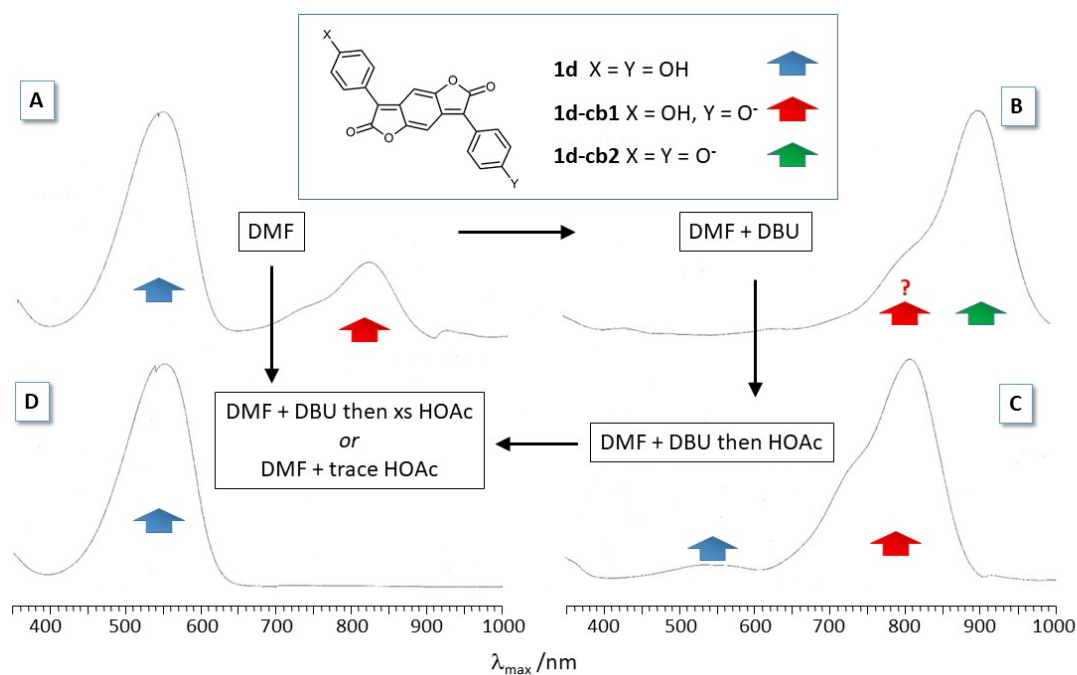

## BDT and ring-opened analogues and their conjugate bases

Visible spectra data are recorded in Table 2 of the main text for **3**, **6**, **7** and **8**. Following are 4 panels of spectra. Panel E from the top shows the conjugate base of BDT enol (**4**) in DMSO, then the parent BDT enol (**3**) in THF. On opening the sample cuvette to lab air a pink colour develops over minutes, due presumably to ionisation in the more polar medium once it has started to absorb ambient moisture. Addition of water (bottom) completes the ionisation. Panels F, G, and H compare ring-opened analogues **6**, **7**, and **8** each in DMSO and DMF where ionisation is complete, then in DCM revealing the parent compounds, and finally in DCM after the addition of an equivalent of TEA to bring about full ionisation.

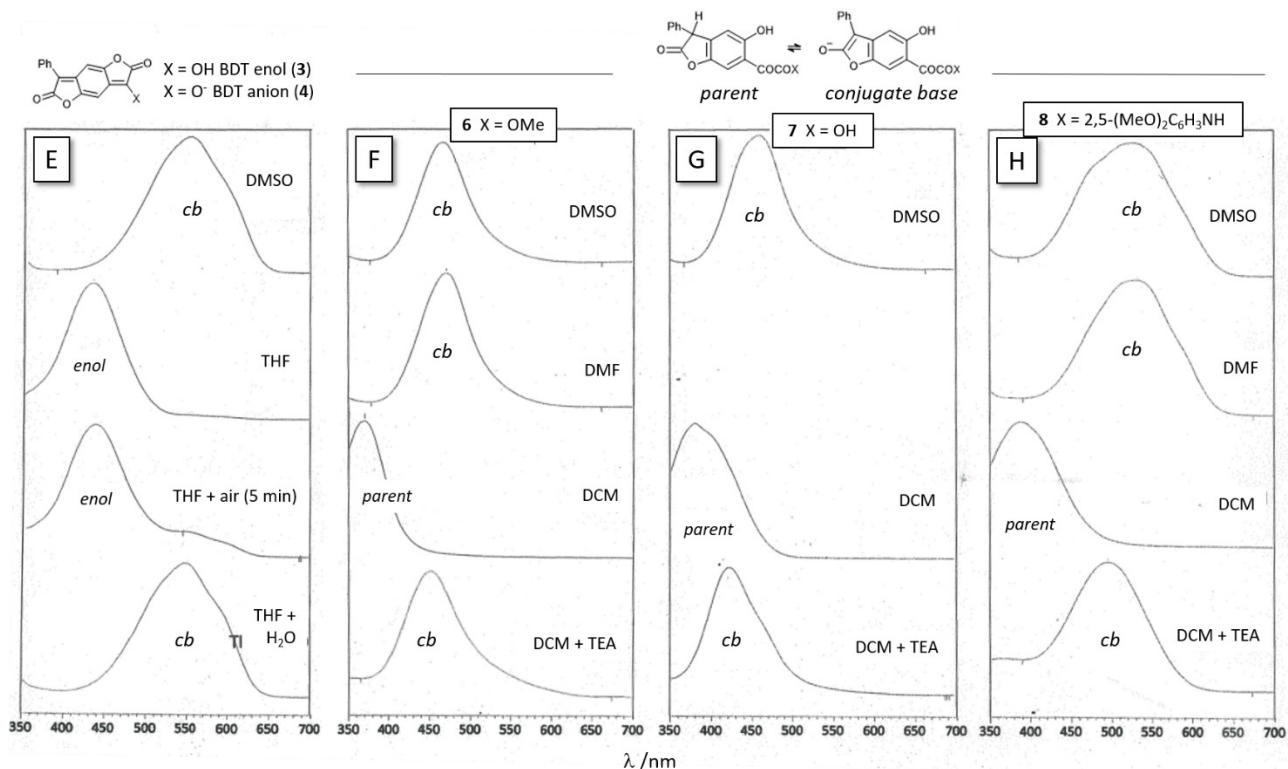

### X-ray structure determination of compound 7

Crystallographic measurements on a weakly diffracting yellow plate of **7** were made with monochromatic Cu radiation ( $\lambda = 1.54184$  Å) using an Oxford Diffraction Gemini E diffractometer. Data reduction utilised CrysalisPro.<sup>1</sup> The structure was solved using direct methods, and refined against  $F^2$  to convergence using all unique reflections and the program Shelxl-2018 as implemented within WINGX.<sup>2,3</sup> Difference syntheses showed electron density peaks corresponding to two different chemically sensible positions for the carboxylic acid H atom. This was thus modelled as disordered over two sites, approximately corresponding to a 180 ° rotation about the C-O bond. Selected crystallographic and refinement parameters are given below. Full details in cif format have been deposited with the Cambridge Structural Database as CCDC 1994670.  $C_{16}H_{10}O_6$ ; Monoclinic  $P2_1/c$ . 123(2) K, a, b, c = 13.653(6), 5.286(2), 17.808(7) Å,  $\beta = 100.77(5)^\circ$ ,  $V = 1262.6(9)$  Å<sup>3</sup>. 6789 reflections of which 2082 are unique,  $R_{int} 0.0749$ , 207 refined parameters,  $R = 0.0619$ ,  $R_w = 0.2197$ ,  $S = 0.941$ .

1. *CrysalisPro*. (Rigaku Oxford Diffraction, 2019).
2. Sheldrick, G. M. Crystal structure refinement with SHELXL. *Acta Crystallogr. Sect. C Struct. Chem.* 2015, **71**, 3–8.
3. Farrugia, L. J., WinGX and ORTEP for Windows: an update. *J. Appl. Crystallogr.* 2012, **45**, 849–854.

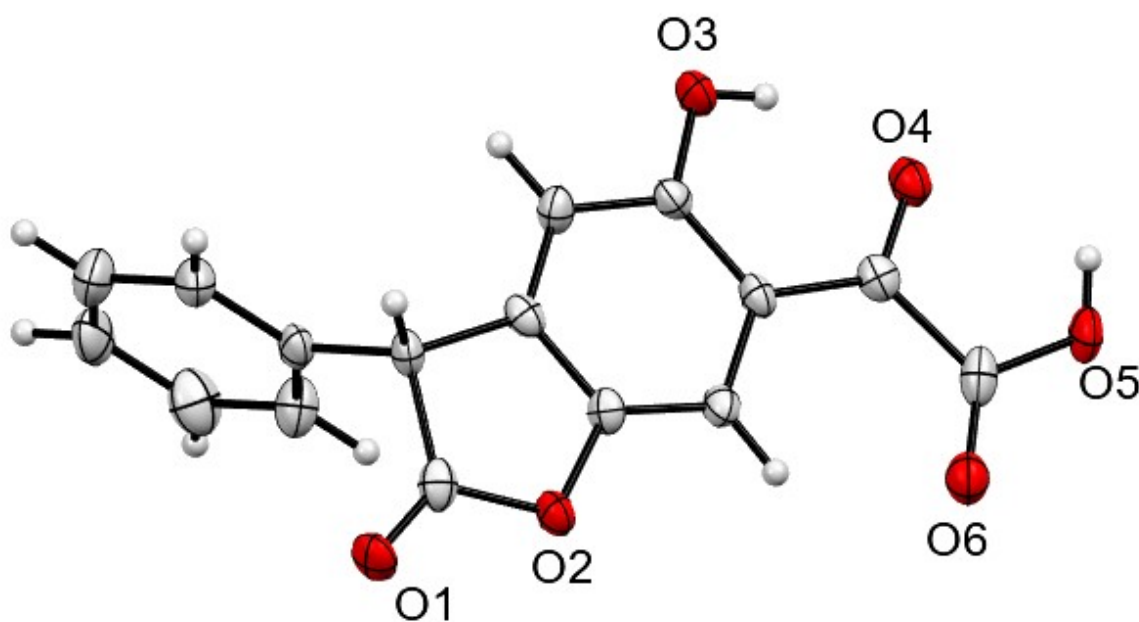

**Figure** ORTEP view of the molecular structure of **7**. Non-H atoms are drawn as 50% probability ellipsoids and H atoms are drawn as small spheres of arbitrary size. The disorder of the H atom bonded to O5 is not shown.

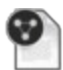

dyestar1009mono.cif

## Datablock: shelx

---

Bond precision: C-C = 0.0071 Å Wavelength=1.54180

Cell: a=13.653(5) b=5.286(2) c=17.808(7)

alpha=90 beta=100.77(5) gamma=90

Temperature: 123 K

|                        | Calculated   | Reported     |
|------------------------|--------------|--------------|
| Volume                 | 1262.6(9)    | 1262.6(9)    |
| Space group            | P 21/c       | P 21/c       |
| Hall group             | -P 2ybc      | -P 2ybc      |
| Moiety formula         | C16 H10 O6   | ?            |
| Sum formula            | C16 H10 O6   | C16 H10 O6   |
| Mr                     | 298.24       | 298.24       |
| Dx, g cm <sup>-3</sup> | 1.569        | 1.569        |
| Z                      | 4            | 4            |
| Mu (mm <sup>-1</sup> ) | 1.036        | 1.036        |
| F000                   | 616.0        | 616.0        |
| F000'                  | 618.27       |              |
| h, k, lmax             | 16, 6, 21    | 16, 6, 21    |
| Nref                   | 2281         | 2082         |
| Tmin, Tmax             | 0.865, 0.969 | 0.657, 1.000 |
| Tmin'                  | 0.865        |              |

Correction method= # Reported T Limits: Tmin=0.657

Tmax=1.000 AbsCorr = MULTI-SCAN

Data completeness= 0.913 Theta(max)= 67.499

R(reflections)= 0.0619( 1089) wR2(reflections)=  
0.2197( 2082)

S = 0.942 Npar= 207

---

**Search of the Cambridge Crystal Structure Database**

A search was made of the CSD version March 2021 for X-ray structures of molecules containing the substructure C\*-CO-CO-R, where C\* is a 3-coordinate carbon atom (*i.e.* sp<sup>2</sup>), R is O or N, and the substructure is acyclic. All structures containing a metal were rejected. Only structures that had atom positions available and where R was 10% or less were accepted. The following lists include all the search results that underpin the statistics presented in Figure 4 and associated discussion in the main text. Dihedral angles are recorded for the  $\alpha$ -dicarbonyl OC-CO unit present in each structure determined. The minus signs of negative dihedral angles are disregarded, and values reported as positive in the lists following. The Refcodes and Compound Names are as reported in the CSD.

The data underpinning the histograms in Figure 4 are as follows.

| Substructure             | Structures found / 15 degree bin |       |       |       |       |       |        |         |         |         |         |         | Total |
|--------------------------|----------------------------------|-------|-------|-------|-------|-------|--------|---------|---------|---------|---------|---------|-------|
|                          | 0-15                             | 15-30 | 30-45 | 45-60 | 60-75 | 75-90 | 90-105 | 105-120 | 120-135 | 135-150 | 150-165 | 165-180 |       |
| C*-CO-CO-NH              | 0                                | 0     | 0     | 0     | 0     | 3     | 6      | 6       | 8       | 20      | 30      | 49      | 122   |
| C*-CO-CO-NC <sub>2</sub> | 0                                | 0     | 0     | 0     | 1     | 20    | 60     | 23      | 4       | 1       | 0       | 0       | 109   |
| C*-CO-CO-OH              | 1                                | 0     | 1     | 0     | 0     | 0     | 2      | 0       | 4       | 1       | 2       | 7       | 18    |
| C*-CO-CO-OC              | 4                                | 2     | 5     | 7     | 6     | 17    | 19     | 15      | 12      | 6       | 9       | 12      | 114   |

**Amide-types based on the substructure C\*-CO-CO-N**

| Refcode | Dihedral angle | Compound Name                                                                                                            |
|---------|----------------|--------------------------------------------------------------------------------------------------------------------------|
| LITTEO  | 68.347         | 2-oxo-N,N-diphenyl-2-(6-methylpyridin-2-yl)acetamide                                                                     |
| QUBNOR  | 80.304         | 2-Oxo-2-phenyl-N-[(R)-1-phenylethyl]acetamide                                                                            |
| QUPWEE  | 80.408         | N-(2-t-Butylphenyl)-N-isopropyl-2-oxo-2-phenylacetamide                                                                  |
| NAJCEH  | 80.592         | 3-((Di-isopropylamino)oxaly)-N-((S)-1-naphthalen-1-ylethyl)benzamide                                                     |
| VOMYAA  | 80.949         | 1-(cyclohex-1-en-1-yl)-2-[3,3-bis(propan-2-yl)triaz-1-en-1-yl]ethane-1,2-dione                                           |
| RUHYEY  | 81.023         | (4-Benzyloxyindol-3-yl)-glyoxylic acid N,N-di-isopropylamide                                                             |
| VOMXON  | 82.16          | 1-[3,3-bis(propan-2-yl)triaz-1-en-1-yl]-2-(4-methoxyphenyl)ethane-1,2-dione                                              |
| ZIRWEF  | 84.707         | 2-(2-aminophenyl)-N-benzyl-N-[2-(1H-indol-3-yl)ethyl]-2-oxoacetamide                                                     |
| GIKYOO  | 85.355         | 1,1,6,6-Tetraphenylhexa-2,4-diyne-1,6-diol 1-(benzoylcarbonyl)piperidine clathrate                                       |
| VIZTII  | 85.594         | Methyl (((2-acetamidophenyl)(oxo)acetyl)amino)acetate                                                                    |
| OHOOLO  | 85.982         | N-Methoxy-N-methyl-2,3-dioxobutanamide                                                                                   |
| ZOHNOZ  | 87.057         | m-Chlorophenyl-N,N-di-isopropylglyoxylamide                                                                              |
| VAYKOY  | 87.177         | N-(1-iminoethyl)-2-oxo-2-(4-oxo-4H-pyrido[1,2-a]pyrimidin-3-yl)acetamide                                                 |
| XONVEC  | 87.202         | 1-(2-Methoxyphenyl)-2-(2-oxo-4-phenyl-1,3-oxazolidin-3-yl)-1,2-ethanedione                                               |
| NUDQAF  | 87.412         | 1-(3,5-Dimethylpiperazin-1-yl)-2-(4-fluoro-1H-indol-3-yl)ethane-1,2-dione monohydrate                                    |
| XULCIT  | 87.668         | 3-[oxo(phenyl)acetyl]-1,1-bis(propan-2-yl)triaz-1-en-1-ium trifluoromethanesulfonate                                     |
| XOGYEY  | 87.988         | 4,5-bis(Hydroxy(diphenyl)methyl)-2,2-(pentamethylene)-1,3-dioxolane 1-phenyl-2-(1-piperidinyl)-1,2-ethanedione clathrate |
| JAGLAE  | 88.046         | (+)-N,N-Di-isopropylphenylglyoxylamide                                                                                   |
| ZELLOR  | 88.138         | N-(Benzoylformyl)-N-benzyl-S-phenylthiocarbamate                                                                         |
| KAHWIA  | 88.509         | 4-((Di-isopropylamino)oxaly)-N-((R)-1-phenylethyl)benzamide                                                              |
| CECZIV  | 88.549         | 2-(1H-Indol-3-yl)-N,N-dimethyl-2-oxoacetamide                                                                            |
| NAHZIG  | 88.815         | 4-((Di-isopropylamino)oxaly)-N-((R)-1-phenylethyl)benzamide                                                              |
| NAHZUS  | 88.84          | 4-((Di-isopropylamino)oxaly)-N-((R)-3-methylbutan-2-yl)benzamide                                                         |
| ZELLUX  | 88.909         | N-(Benzoylformyl)-N-methyl-S-phenylthiocarbamate                                                                         |
| AGIZAU  | 89.091         | N,N-diethyl-3-(2-methyl-2-phenylhydrazinylidene)-2-oxobutanamide                                                         |
| ZUBVEZ  | 89.191         | N-(4-Chlorophenyl)-N-(2-(cyclohexylamino)-1-(3-methoxyphenyl)-2-oxoethyl)-2-oxo-2-phenylacetamide                        |
| NAJBWU  | 89.227         | 4-((Di-isopropylamino)oxaly)-N-((R)-1-phenyl-2-hydroxyethyl)benzamide                                                    |
| NAJBOQ  | 89.665         | 4-((Di-isopropylamino)oxaly)-N-((1R,2S)-1-hydroxy-1-phenylpropan-2-yl)-N-methylbenzamide benzene solvate                 |
| WULZEJ  | 89.726         | N-(2,5-Di-t-butylphenyl)-N-methyl-2-oxo-2-phenylacetamide                                                                |
| VOMYII  | 89.766         | 1-(3,3-dicyclohexyltriaz-1-en-1-yl)-2-(4-methoxyphenyl)ethane-1,2-dione                                                  |

|        |         |                                                                                                                                           |
|--------|---------|-------------------------------------------------------------------------------------------------------------------------------------------|
| SAPFOF | 90.118  | 2-(2,4-Dihydroxyphenyl)-N,N-dimethyl-2-oxoacetamide                                                                                       |
| FEMMEQ | 90.151  | trans-2,3-bis(Hydroxydiphenylmethyl)-1,4-dioxaspiro(4,5)decane 4-(oxophenylacetyl)morpholine clathrate                                    |
| REPDOH | 90.259  | 1-(4-Benzoylpiperazin-1-yl)-2-(4-fluoro-7-(1H-pyrazol-3-yl)-1H-pyrrolo[2,3-c]pyridin-3-yl)ethane-1,2-dione                                |
| WOLZIJ | 90.498  | N-[dimethyl(oxo-lambda\$6!-sulfanylidene)-2-oxo-2-phenylacetamide                                                                         |
| POWMIX | 90.713  | (R)-(+)-N-Ethyl-N-isopropylphenylglyoxylamide                                                                                             |
| LUXRAY | 90.735  | 2-(Biphenyl-4-yl)-N,N-dimethyl-2-oxoacetamide                                                                                             |
| XOMYOP | 90.77   | N-(2-(oxo(piperidin-1-yl)acetyl)phenyl)propanamide                                                                                        |
| XOGYEV | 91.033  | 4,5-bis(Hydroxy(diphenyl)methyl)-2,2-(pentamethylene)-1,3-dioxolane 1-phenyl-2-(1-piperidinyl)-1,2-ethanedione clathrate                  |
| XONVEC | 91.4    | 1-(2-Methoxyphenyl)-2-(2-oxo-4-phenyl-1,3-oxazolidin-3-yl)-1,2-ethanedione                                                                |
| NAJBAC | 91.676  | 2-(4-((Di-isopropylamino)oxalyl)benzoylamino)-(S)-3-phenylpropionic acid methyl ester                                                     |
| XOBGUR | 91.726  | 1,1,2,2-Tetraphenyl-1,2-ethanediol 1-phenyl-2-(1-piperidinyl)-1,2-ethanedione clathrate                                                   |
| FEMMEQ | 91.943  | trans-2,3-bis(Hydroxydiphenylmethyl)-1,4-dioxaspiro(4,5)decane 4-(oxophenylacetyl)morpholine clathrate                                    |
| WIQKUC | 91.991  | N,N-Diisopropyl-(3-methylphenyl)glyoxylamide                                                                                              |
| GIKYUU | 92.247  | 1-(Benzoylcarbonyl)piperidine                                                                                                             |
| DUBKUI | 92.612  | 1-(3-(4-Bromophenyl)-4,6-dimethoxy-1H-indol-7-yl)-2-(piperidin-1-yl)ethane-1,2-dione                                                      |
| DUBKUI | 92.73   | 1-(3-(4-Bromophenyl)-4,6-dimethoxy-1H-indol-7-yl)-2-(piperidin-1-yl)ethane-1,2-dione                                                      |
| HOBJOX | 92.782  | N-(4-((4-Acetyl-1-piperazinyl)oxoacetyl)phenyl)-2-methyl-propanamide                                                                      |
| XIMBUS | 93.018  | N-t-Butyl-2-(2-methoxyphenyl)-2-oxoacetamide                                                                                              |
| NAJBEG | 93.173  | 2-(4-((Di-isopropylamino)oxalyl)benzoylamino)-3-((S)-4-hydroxyphenyl)propionic acid methyl ester                                          |
| PEQHAU | 93.45   | 2-(3'-(4''-Chlorophenyl)-4',6'-dimethoxyindol-7'-yl)glyoxyl-1-pyrrolidine                                                                 |
| COSTIO | 93.474  | N,N-Dimethyl(6,8-dimethoxy-1,2-diphenylpyrrolo[3,2,1-hi]indol-4-yl)glyoxylamide                                                           |
| XIMBUS | 93.502  | N-t-Butyl-2-(2-methoxyphenyl)-2-oxoacetamide                                                                                              |
| WUGGIQ | 93.799  | 1-(4-bromo-2-((2-(morpholin-4-yl)ethyl)amino)phenyl)-2-(morpholin-4-yl)ethane-1,2-dione                                                   |
| AVUMOT | 94.301  | 3-(2-(N,N-Diethylamino)glyoxyloyl)-1H-indol-4-yl acetate monohydrate                                                                      |
| YOWVUB | 94.34   | N,N-Di-isopropyl(o-methylphenyl)glyoxylamide                                                                                              |
| RIVZED | 94.56   | N,N-Dimethyl-2,3-dioxobutanamide                                                                                                          |
| NAJBIK | 94.823  | 4-((Di-isopropylamino)oxalyl)-N-((1S,2S)-2-hydroxy-1-methoxymethyl-2-phenylethyl)benzamide benzene solvate                                |
| XOMYEF | 94.955  | N-(2-(oxo(piperidin-1-yl)acetyl)phenyl)acetamide                                                                                          |
| QUBNUX | 95.038  | N,N-Dimethyl-2-(1-naphthyl)-2-oxoacetamide                                                                                                |
| DOXJEH | 95.178  | N,N'-bis(2-((t-butylamino)(oxo)acetyl)phenyl)hexanediamide                                                                                |
| NUKSUH | 95.193  | N-Benzyl-N-methacryloylbenzoylformamide                                                                                                   |
| IZANEE | 95.426  | 1-(2-amino-3-fluorophenyl)-2-(3,4-dihydroisoquinolin-2(1H)-yl)ethane-1,2-dione                                                            |
| DUBKUI | 95.654  | 1-(3-(4-Bromophenyl)-4,6-dimethoxy-1H-indol-7-yl)-2-(piperidin-1-yl)ethane-1,2-dione                                                      |
| FEXJUP | 95.654  | 1-(Piperidin-1-yl)butane-1,2,3-trione                                                                                                     |
| DUBKUI | 95.817  | 1-(3-(4-Bromophenyl)-4,6-dimethoxy-1H-indol-7-yl)-2-(piperidin-1-yl)ethane-1,2-dione                                                      |
| WOVBEO | 96.124  | (R,R)-(-)-trans-2,3-bis(Hydroxydiphenylmethyl)-1,4-dioxaspiro(4,5)decane N-ethyl-N-methylbenzoylformamide clathrate                       |
| SUTTOR | 97.431  | 1-(4-Benzoylpiperazin-1-yl)-2-(4,7-dimethoxy-1H-pyrrolo[2,3-c]pyridin-3-yl)ethane-1,2-dione                                               |
| WOVBEO | 97.577  | (R,R)-(-)-trans-2,3-bis(Hydroxydiphenylmethyl)-1,4-dioxaspiro(4,5)decane N-ethyl-N-methylbenzoylformamide clathrate                       |
| YOWVUF | 98.057  | N,N-Di-isopropyl(p-methylphenyl)glyoxylamide                                                                                              |
| NUKSAN | 98.112  | N-Tigloylbenzoylformanilide                                                                                                               |
| QEKCAK | 98.165  | N-(2-t-Butylphenyl)-N-allyl-phenyloxamide                                                                                                 |
| IWIXAO | 98.743  | 1-Benzoyl-4-(2-(4-methoxy-7-(3-methyl-1H-1,2,4-triazol-1-yl)-1-((phosphonoxy)methyl)-1H-pyrrolo(2,3-c)pyridin-3-yl)-1,2-dioxoethyl)phenyl |
| IGIRUO | 98.751  | 1-(4-chlorophenyl)-2-(4-methylpiperazin-1-yl)ethane-1,2-dione                                                                             |
| QUPWII | 99.333  | N-(2-t-Butylphenyl)-N-cyclohexyl-2-oxo-2-phenylacetamide                                                                                  |
| QAKREB | 99.392  | N-(2-Oxo-2-phenylacetyl)benzamide                                                                                                         |
| ZOHNUF | 99.53   | p-Chlorophenyl-N,N-di-isopropylglyoxylamide                                                                                               |
| POWMET | 99.932  | (R)-(+)-N-Ethyl-N-isopropylphenylglyoxylamide trans-2,3-bis(hydroxydiphenylmethyl)-1,4-dioxaspiro(5,4)decane clathrate                    |
| NAJCAD | 100.029 | 3-((Di-isopropylamino)oxalyl)-N-((R)-1-phenylethyl)benzamide monohydrate                                                                  |
| NUKTAO | 100.188 | N-Methacryloylbenzoylformanilide                                                                                                          |

|          |         |                                                                                                                                                            |
|----------|---------|------------------------------------------------------------------------------------------------------------------------------------------------------------|
| DOXJUX   | 100.385 | N,N'-bis(2-((hexylamino)(oxo)acetyl)-4-methylphenyl)ethanediamide                                                                                          |
| ZUBVAV   | 100.826 | N-(4-Chlorophenyl)-N-(2-(cyclohexylamino)-1-(2,3-dimethoxyphenyl)-2-oxoethyl)-2-oxo-2-phenylacetamide dichloromethane solvate                              |
| GIMKIW   | 101.059 | (S)-(-)-1,6-bis(o-Chlorophenyl)-1,6-diphenylhexa-2,4-diyne-1,6-diol N,N-dimethyl- $\alpha$ -oxobenzenacetamide clathrate                                   |
| YOWWAI   | 101.151 | N,N-Di-isopropyl(3,4-dimethylphenyl)glyoxylamide                                                                                                           |
| HAPCIN   | 101.176 | N-(2-methoxyphenyl)-N-((4-methylphenyl)sulfonyl)-2-oxo-2-phenylacetamide                                                                                   |
| NUDPUY   | 101.449 | 1-(4-Benzoyl-3,5-dimethylpiperazin-1-yl)-2-(4-fluoro-1H-indol-3-yl)ethane-1,2-dione ethyl acetate solvate                                                  |
| RUYWEO   | 102.039 | 2-(2-Amino-3-bromophenyl)-N,N-diethyl-2-oxoacetamide                                                                                                       |
| ZEDJUN   | 102.195 | bis((R,R)-(-)-trans-2,3-bis(Diphenylhydroxymethyl)-1,4-dioxaspiro(4.5)decane) N-isopropyl-N-methylphenylglyoxylamide                                       |
| HAPCOT   | 102.304 | N-(4-methylphenyl)-N-((4-methylphenyl)sulfonyl)-2-oxo-2-phenylacetamide                                                                                    |
| ZEDJOH   | 102.344 | bis((R,R)-(-)-trans-2,3-bis(Diphenylhydroxymethyl)-1,4-dioxaspiro(4.4)nonane) N-isopropyl-N-methylphenylglyoxylamide                                       |
| RIYQUL01 | 102.609 | 1-(10,10-Dimethyl-3,3-dioxo-3-thia-4-azatricyclo[5.2.1.0 $\{5,1\}$ ]decan-4-yl)-2-phenylethane-1,2-dione                                                   |
| JADTUG   | 102.822 | ethyl (2-(1-((4-bromophenyl)(oxo(phenyl)acetyl)amino)-2-(t-butylamino)-2-oxoethyl)-1H-pyrrol-1-yl)acetate                                                  |
| XOBHAY   | 103.046 | 1,1,6,6-Tetraphenyl-2,4-hexadiyne-1,6-diol 1-(4-morpholinyl)-2-phenyl-1,2-ethanedione clathrate                                                            |
| SEMCOE   | 103.217 | 1-(4-Bromophenyl)-2-(piperidin-1-yl)ethane-1,2-dione                                                                                                       |
| QUQNOH   | 103.41  | t-butyl (2-(oxo(pyrrolidin-1-yl)acetyl)phenyl)carbamate                                                                                                    |
| IWIXOC   | 104.322 | 1,3-Dihydroxy-2-(hydroxymethyl)propan-2-aminium (3-((4-benzoylpiperazin-1-yl)(oxo)acetyl)-4-methoxy-7-(3-methyl-1H-1,2,4-triazol-1-yl)phenyl)triscarbamate |
| IWIXIW   | 104.607 | 1,3-Dihydroxy-2-(hydroxymethyl)propan-2-aminium (3-((4-benzoylpiperazin-1-yl)(oxo)acetyl)-4-methoxy-7-(3-methyl-1H-1,2,4-triazol-1-yl)phenyl)triscarbamate |
| XOBGOL   | 104.632 | 2,5-Diphenylhydroquinone 1-(4-morpholinyl)-2-phenyl-1,2-ethanedione clathrate                                                                              |
| VAFPEZ   | 104.691 | (S)-N-(2-Methyl-1-phenylprop-2-en-1-yl)-2-oxo-2-phenylacetamide                                                                                            |
| PEMHAR   | 105.675 | 1-(Azepan-1-yl)-2-(1H-indol-3-yl)ethane-1,2-dione                                                                                                          |
| NAJCAD   | 106.148 | 3-((Di-isopropylamino)oxalyl)-N-((R)-1-phenylethyl)benzamide monohydrate                                                                                   |
| POTDAE   | 106.358 | N,N-Dimethyl-4,6-dimethoxy-1-(N,N-dimethylacetamido)-2,3-diphenylindol-7-ylglyoxylamide                                                                    |
| OTODUX   | 106.677 | Trimethyl (nitritotris(ethane-2,1-diylimino(1,2-dioxoethane-2,1-diyl)-2,1-phenylene))triscarbamate dichloromethane solvate                                 |
| MODLOJ   | 106.956 | N-[[4-nitrophenyl)sulfonyl]-N-[(oxiran-2-yl)methyl]-2-oxo-2-phenylacetamide                                                                                |
| ZOHNIT   | 107.786 | o-Chlorophenyl-N,N-di-isopropylglyoxylamide                                                                                                                |
| XOBGAX   | 108.174 | 1,6-bis(2-Chlorophenyl)-1,6-dihydroxy-1,6-diphenylhexa-2,4-diyne 1-(4-morpholinyl)-2-phenyl-1,2-ethanedione clathrate                                      |
| WULZIN   | 109.113 | N-(2-t-Butylphenyl)-N-methyl-2-oxo-2-phenylacetamide                                                                                                       |
| WOTZUA   | 109.669 | (R,R)-(-)-trans-2,3-bis(Hydroxydiphenylmethyl)-1,4-dioxaspiro(4.4)nonane N-ethyl-N-methylbenzoylformamide clathrate                                        |
| WIHHIH   | 111.888 | 1-benzyl-N-(3-chlorophenyl)-4-(((3-chlorophenyl)amino)(oxo)acetyl)-2-methyl-3,5-bis(4-methylphenyl)-2,3-dihydro-1H-pyrrole-2-carboxamide                   |
| NUKSIV   | 111.931 | N-Methacryloylbenzoylformyl(2,6-dimethyl)anilide                                                                                                           |
| LAYWUE   | 111.981 | 10,10-dimethyl-3-p-tosyl-4-(2-oxo-2-phenylacetyl)-3,4-diazatricyclo(5.2.1.0 $\{5,1\}$ )decan-2-one                                                         |
| RUPCOV   | 111.99  | N-(2,6-Dimethylphenyl)-2-(2-hydroxyphenyl)-2-oxoacetamide                                                                                                  |
| TIRPAO   | 112.079 | 2-oxo-N,2-diphenyl-N-(propan-2-yl)acetamide                                                                                                                |
| NUKTIW   | 112.473 | N-Methacryloylbenzoyl-2,6-dichloroformanilide                                                                                                              |
| VAFPEZ   | 113.03  | (S)-N-(2-Methyl-1-phenylprop-2-en-1-yl)-2-oxo-2-phenylacetamide                                                                                            |
| QOTNIW   | 113.965 | (-)-trans-1,4-bis(3-(o-Chlorophenyl)-3-hydroxy-3-phenylprop-1-ynyl)-2,3,5,6-tetrachloro-2,5-cyclohexadiene-1,4-diol N,N-dimethylphenylglyoxylamide         |
| DONRUV   | 114.271 | N-benzyl-2-oxo-2-phenylacetamide                                                                                                                           |
| WEPCID01 | 114.652 | N-Isopropyl-N-tigloylbenzoylformamide                                                                                                                      |
| QUBNOR   | 114.801 | 2-Oxo-2-phenyl-N-[(R)-1-phenylethyl]acetamide                                                                                                              |
| NUKSER   | 115.766 | N-Tigloylbenzoyl-o-methylformanilide                                                                                                                       |
| NUKTES   | 115.855 | N-Tigloylbenzoyl-2,6-dimethylformanilide                                                                                                                   |
| NUKSOB   | 116.038 | N-Isopropyl-N-methacryloylbenzoylformamide                                                                                                                 |
| ACMGHX   | 116.304 | 2'-Acetyl-2'-(p-chlorobenzoyl)-2-(p-methoxyphenyl)-glyoxylohydrazide                                                                                       |
| GIJBEJ   | 116.712 | 1-(3-methyl-1H-indol-1-yl)-2-(4-nitrophenyl)ethane-1,2-dione                                                                                               |
| GIJBEJ   | 116.927 | 1-(3-methyl-1H-indol-1-yl)-2-(4-nitrophenyl)ethane-1,2-dione                                                                                               |
| LUVBIN   | 117.987 | N-(1-Cyclohexenecarbonyl)-N-(5,6,7,8-tetrahydronaphthalen-1-yl)benzoylformamide                                                                            |
| ZIMTUM   | 119.171 | (M)-N-(2-t-Butylphenyl)-2-methylene-N-(oxo(phenyl)acetyl)butanamide                                                                                        |
| ZIMVAU   | 119.213 | (P)-N-(2-t-Butylphenyl)-2-methylene-N-(oxo(phenyl)acetyl)butanamide                                                                                        |
| WOGCUS   | 119.724 | 1-(4-Chlorophenyl)-2-(2-(diphenylmethylene)pyrrolidin-1-yl)ethane-1,2-dione                                                                                |

|        |         |                                                                                                                               |
|--------|---------|-------------------------------------------------------------------------------------------------------------------------------|
| COSTOU | 125.458 | N,N-Dimethyl(6,8-dimethoxyppyrrrolo[3,2,1-hi]indol-2-yl)glyoxyamide                                                           |
| OTODUX | 126.324 | Trimethyl (nitriлотris(ethane-2,1-diyilimino(1,2-dioxoethane-2,1-diyil)-2,1-phenylene))triscarbamate dichloromethane solvate  |
| RUPCOV | 126.866 | N-(2,6-Dimethylphenyl)-2-(2-hydroxyphenyl)-2-oxoacetamide                                                                     |
| LAYXEP | 126.873 | 10,10-dimethyl-3-tosyl-4-(2-oxo-2-(thien-2-yl)acetyl)-3,4-diazatricyclo(5.2.1.0\$1,5!)decan-2-one                             |
| ZIHQOW | 128.643 | Ethyl 2-(N'-(phenyloxalyl)hydrazino)-1-aza-azulene-3-carboxylate                                                              |
| LAYWUE | 129.458 | 10,10-dimethyl-3-p-tosyl-4-(2-oxo-2-phenylacetyl)-3,4-diazatricyclo(5.2.1.0\$1,5!)decan-2-one                                 |
| PAXQEM | 129.876 | N-Cyclohexyl-2-oxo-2-phenylacetamide                                                                                          |
| TEGSIK | 130.558 | 2-(4-methylphenyl)-2-oxoacetamide                                                                                             |
| XIMBOM | 131.853 | N-t-Butyl-2-(4-methoxyphenyl)-2-oxoacetamide                                                                                  |
| DOXJUX | 133.262 | N,N'-bis(2-((hexylamino)(oxo)acetyl)-4-methylphenyl)ethanediamide                                                             |
| OCUKUT | 134.243 | 1-(10,10-Dimethyl-2-oxo-3-phenyl-3,4-diazatricyclo[5.2.1.0\$1,5!]decan-4-yl)-2-phenylethane-1,2-dione                         |
| FEKYIG | 134.853 | N-(4-chloro-2-((2-(1H-indol-2-ylcarbonyl)hydrazino)(oxo)acetyl)phenyl)acetamide dimethyl sulfoxide solvate                    |
| CEKSES | 136.405 | Hexyl N-((2-acetamidophenyl)(oxo)acetyl)glycinate                                                                             |
| WINFEG | 136.589 | N-(2-((Dodecylamino)(oxo)acetyl)-4-methylphenyl)octanamide                                                                    |
| DOXJUX | 136.593 | N,N'-bis(2-((hexylamino)(oxo)acetyl)-4-methylphenyl)ethanediamide                                                             |
| XOVQOR | 136.614 | dimethyl 2,2'-{methylenebis[(6-acetamido-3,1-phenylene)(1,2-dioxoethane-2,1-diyil)azanediyl]}bis[4-(methylsulfanyl)butanoate] |
| WINDUU | 137.036 | Hexyl N-((2-(octanoylamino)phenyl)(oxo)acetyl)glycinate                                                                       |
| WIGHEB | 137.072 | 2-(2-Chlorophenyl)-N-cyclohexyl-2-oxoacetamide unknown solvate                                                                |
| RUBFOM | 137.147 | N-[2-(1H-benzimidazol-2-yl)phenyl]-2-oxo-2-phenylacetamide                                                                    |
| FEKYIG | 137.365 | N-(4-chloro-2-((2-(1H-indol-2-ylcarbonyl)hydrazino)(oxo)acetyl)phenyl)acetamide dimethyl sulfoxide solvate                    |
| OTODUX | 138.176 | Trimethyl (nitriлотris(ethane-2,1-diyilimino(1,2-dioxoethane-2,1-diyil)-2,1-phenylene))triscarbamate dichloromethane solvate  |
| WINFIK | 138.491 | N-(4-Bromo-2-((dodecylamino)(oxo)acetyl)phenyl)octanamide                                                                     |
| XOVQOR | 139.612 | dimethyl 2,2'-{methylenebis[(6-acetamido-3,1-phenylene)(1,2-dioxoethane-2,1-diyil)azanediyl]}bis[4-(methylsulfanyl)butanoate] |
| OCULEE | 139.735 | 1-(10,10-Dimethyl-2-oxo-3-phenyl-3,4-diazatricyclo[5.2.1.0\$1,5!]decan-4-yl)-2-(thiophen-2-yl)ethane-1,2-dione                |
| WINFOQ | 140.774 | N-(2-((Hexylamino)(oxo)acetyl)-4-methylphenyl)octanamide                                                                      |
| HUNCID | 143.056 | 2-(1H-Indol-3-yl)-N-isopropyl-2-oxoacetamide                                                                                  |
| YEFXUD | 144.76  | 1-(1H-Indol-3-ylcarbonyl)-N-(4-methoxybenzyl)formamide                                                                        |
| HUNCUP | 146.015 | N-t-Butyl-2-(1H-indol-3-yl)-2-oxoacetamide                                                                                    |
| QUZQIM | 147.037 | N-(2-[N-(4-Methylphenyl)oxamoyl]phenyl)propanamide                                                                            |
| JEGBIJ | 148.346 | 2-(4-benzoyl-1-benzyl-3-methyl-6-phenyl-1H-pyrazolo[3,4-b]pyridin-5-yl)-N-(4-methylphenyl)-2-oxoacetamide                     |
| IJUHIF | 148.448 | N-Cyclohexyl-2-(5-methoxy-1H-indol-3-yl)-2-oxoacetamide                                                                       |
| HUNCUP | 149.123 | N-t-Butyl-2-(1H-indol-3-yl)-2-oxoacetamide                                                                                    |
| CECZER | 149.267 | 2-(1H-Indol-3-yl)-2-oxoacetamide                                                                                              |
| VONPAS | 151.833 | 2-[4-(benzenecarbonyl)-5-oxo-2-phenyl-6,7-dihydro-5H-cyclopenta[b]pyridin-3-yl]-N-(4-methylphenyl)-2-oxoacetamide             |
| PUFVOE | 151.916 | N-[[4-methylbenzene-1-sulfonyl)methyl]-2-oxo-2-phenylacetamide unknown solvate                                                |
| DOXJIL | 152.121 | N,N'-bis(2-((butylamino)(oxo)acetyl)phenyl)hexanediamide                                                                      |
| MILMUR | 152.493 | N-((1-Benzyl-1H-1,2,3-triazol-4-yl)methyl)-2-(1H-indol-3-yl)-2-oxoacetamide                                                   |
| WOCZIA | 152.73  | 2-oxo-2-(thiophen-3-yl)acetamide                                                                                              |
| WATSEQ | 153.902 | 5,11,17,23-Tetra-t-butyl-25,27-dihydroxy-26,28-bis(2-(2-oxo-2-(2-thienyl)acetamido)ethoxy)calix(4)arene                       |
| CATJOY | 154.443 | 2-(2-Acetamidophenyl)-N-(4-methylphenyl)-2-oxoacetamide                                                                       |
| FOKKAU | 155.809 | N-(2-formylphenyl)-2-oxo-2-phenylacetamide                                                                                    |
| WINFAC | 157.217 | Methyl N-((2-(octanoylamino)phenyl)(oxo)acetyl)glycinate                                                                      |
| DOXJOR | 157.342 | N,N'-bis(2-((methylamino)(oxo)acetyl)phenyl)hexanediamide                                                                     |
| TIFYAI | 157.58  | N-(Pyridin-4-yl)-(1-(4-chlorobenzyl)indol-3-yl)glyoxyamide                                                                    |
| DOXJOR | 158.084 | N,N'-bis(2-((methylamino)(oxo)acetyl)phenyl)hexanediamide                                                                     |
| YILDOM | 158.115 | 3-Benzoylformamido-4-phenyl-1,2,5-thiadiazole                                                                                 |
| RUBFOM | 158.455 | N-[2-(1H-benzimidazol-2-yl)phenyl]-2-oxo-2-phenylacetamide                                                                    |
| CATJIS | 158.465 | N-(2-(((4-Bromophenyl)amino)(oxo)acetyl)phenyl)propanamide                                                                    |
| IZALIF | 159.971 | 2-(3-Benzoyl-1-benzyl-5-phenyl-1H-pyrazol-4-yl)-N-(4-methoxyphenyl)-2-oxoacetamide                                            |



|          |         |                                                                                                                                                                                                |
|----------|---------|------------------------------------------------------------------------------------------------------------------------------------------------------------------------------------------------|
| UPOROI   | 160.082 | Methyl 4-(((4-methoxyphenyl)amino)(oxo)acetyl)-1,5-diphenyl-1H-pyrazole-3-carboxylate                                                                                                          |
| OBOYEL   | 160.427 | 2-(2-Chlorophenyl)-2-oxo-N-phenylacetamide                                                                                                                                                     |
| MAXNIL   | 160.858 | N-(4-chlorophenyl)-2,3-dioxo-3-phenylpropanamide                                                                                                                                               |
| WINFUW   | 161.012 | N-(2-((Methylamino)(oxo)acetyl)phenyl)octanamide                                                                                                                                               |
| UPOROI   | 161.195 | Methyl 4-(((4-methoxyphenyl)amino)(oxo)acetyl)-1,5-diphenyl-1H-pyrazole-3-carboxylate                                                                                                          |
| TOPYUU   | 161.25  | 2-(2-Acetamidophenyl)-N-(4-nitrophenyl)-2-oxoacetamide                                                                                                                                         |
| CEKSOC   | 161.516 | 2-(2-Acetamido-5-bromophenyl)-N-hexyl-2-oxoacetamide cyclohexane solvate                                                                                                                       |
| JEGBOP   | 162.229 | methyl 5-(anilino(oxo)acetyl)-6-(4-methoxyphenyl)-3-methyl[1,2]oxazolo[5,4-b]pyridine-4-carboxylate                                                                                            |
| LEBBID   | 162.359 | 2'-(N-Isopropylloxamoyl)acetanilide                                                                                                                                                            |
| HUNCOJ   | 162.955 | N-t-Butyl-2-(5-methoxy-1H-indol-3-yl)-2-oxoacetamide                                                                                                                                           |
| CEKSUI   | 163.061 | 2-(2-Acetamido-5-bromophenyl)-N-hexyl-2-oxoacetamide                                                                                                                                           |
| OXMBZS   | 163.364 | Ammonium 2-oxamoyl-3-methyl-benzenesulfonate                                                                                                                                                   |
| GUNDOI   | 163.579 | N-Phenyl phenylglyoxamide                                                                                                                                                                      |
| YUVTEP   | 164.782 | N-(4-Methylphenyl)-2-oxo-2-phenylacetamide                                                                                                                                                     |
| TIZZAD   | 165.157 | 2-(3'-(4''-Chlorophenyl)-4',6'-dimethoxyindol-2'-yl)glyoxyamide                                                                                                                                |
| JOTFIJ   | 165.315 | N-(4-cyanophenyl)-2-oxo-2-phenylacetamide                                                                                                                                                      |
| HIKXII   | 165.337 | (3,3-Dimethyl-1,2,3,4-tetrahydroisoquinol-1-ylidene)pyruvoylhydrazide                                                                                                                          |
| MEGKOY   | 165.387 | (1S,5S,6S,8S,10R)-5(((2R,3R,4R)-2,3-Dimethyl-4-(phenylselenylmethyl)-3,4-dihydro-2H-pyran-6-yl)oxoethanamido)-9,9-dimethyl-10-methyl-1,2,3,4-tetrahydroisoquinolin-1-ylidene)pyruvoylhydrazide |
| MIBHOW   | 167.029 | (Z)-4-[5-(2,6-Difluorobenzyl)-1-(2-fluorobenzyl)-2-oxo-1,2-dihydropyridin-3-yl]-4-hydroxy-2-oxo-N-(2-oxopyrrolidin-1-yl)but-3-enamide                                                          |
| ZIHQOW   | 168.289 | Ethyl 2-(N'-(phenyloxalyl)hydrazino)-1-aza-azulene-3-carboxylate                                                                                                                               |
| YIVFIV   | 168.311 | N-benzyl-2-oxo-2-(thiophen-2-yl)acetamide                                                                                                                                                      |
| BOPRUV   | 168.543 | N-(5-(methylsulfanyl)-4-phenyl-1,3-thiazol-2-yl)-2-oxo-2-phenylacetamide                                                                                                                       |
| EVIFEV   | 168.768 | N-Cyclohexyl-2-(5-fluoro-1H-indol-3-yl)-2-oxoacetamide                                                                                                                                         |
| VOKSUM   | 169.018 | 2-[1-(4-chlorophenyl)-5-(4-nitrophenyl)-1H-pyrazol-4-yl]-N-methyl-2-oxoacetamide dichloromethane solvate                                                                                       |
| QOWZUA   | 169.277 | 3-(3,3-dimethyl-3,4-dihydroisoquinolin-1(2H)-ylidene)-N-hydroxy-2-oxopropanamide                                                                                                               |
| IGERUH   | 169.536 | 2-(1-Cyclopent-2-enyl-1H-indol-3-yl)-N-(2-(1H-indol-3-yl)ethyl)-2-oxoacetamide                                                                                                                 |
| GIZYIY   | 169.646 | (2-Furyl)oxoacetamide                                                                                                                                                                          |
| YUVTEP   | 169.773 | N-(4-Methylphenyl)-2-oxo-2-phenylacetamide                                                                                                                                                     |
| IJUSOW   | 169.815 | 2-(1-Ethyl-5-methoxy-1H-indol-3-yl)-N-(4-methoxyphenyl)-2-oxoacetamide                                                                                                                         |
| IJUSOW   | 170.185 | 2-(1-Ethyl-5-methoxy-1H-indol-3-yl)-N-(4-methoxyphenyl)-2-oxoacetamide                                                                                                                         |
| BATNUI   | 170.2   | tetra-n-butylammonium 2-(2-acetamidophenyl)-N-(4-nitrophenyl)-2-oxoacetamide chloride                                                                                                          |
| GLYXAN   | 170.205 | p-Tolyl-glyoxylic acid m-trifluoroanilide                                                                                                                                                      |
| HAFTUF   | 171.018 | 2-(Imidazo[1,2-a]pyridin-2-yl)-2-oxo-N-(pyridin-2-yl)acetamide                                                                                                                                 |
| JOTFIJ01 | 171.449 | N-(4-cyanophenyl)-2-oxo-2-phenylacetamide                                                                                                                                                      |
| MPGCAN   | 172.562 | p-Tolyl-glyoxylic acid p-chloroanilide                                                                                                                                                         |
| IJUSOW   | 172.858 | 2-(1-Ethyl-5-methoxy-1H-indol-3-yl)-N-(4-methoxyphenyl)-2-oxoacetamide                                                                                                                         |
| LOHPOO   | 173.331 | 4-Desoxy-4beta-((5-methoxy-1H-indol-3-yl)oxalylamino)podophyllotoxin methanol solvate                                                                                                          |
| JOXVUP   | 173.682 | 2-Oxo-N-(2-oxo-2-(1H-pyrrol-2-yl)ethyl)-2-(3,4,5-trimethoxyphenyl)acetamide                                                                                                                    |
| IGERUH   | 173.742 | 2-(1-Cyclopent-2-enyl-1H-indol-3-yl)-N-(2-(1H-indol-3-yl)ethyl)-2-oxoacetamide                                                                                                                 |
| IJUSOW   | 174.368 | 2-(1-Ethyl-5-methoxy-1H-indol-3-yl)-N-(4-methoxyphenyl)-2-oxoacetamide                                                                                                                         |
| JOXVUP   | 174.577 | 2-Oxo-N-(2-oxo-2-(1H-pyrrol-2-yl)ethyl)-2-(3,4,5-trimethoxyphenyl)acetamide                                                                                                                    |
| UREBUP   | 174.913 | 2-(1-Ethyl-5-methoxy-1H-indol-3-yl)-N-isopropyl-2-oxoacetamide                                                                                                                                 |
| ULAXIQ   | 175.055 | N-(4-Methoxyphenyl)-2-oxo-2-(4-phenyl-1,3-thiazol-2-yl)acetamide                                                                                                                               |
| CILLOY   | 175.188 | 3-Methoxycarbonyl-1-p-tolyl-4-p-tolyloxamoyl-5-p-ethoxyphenylpyrazole                                                                                                                          |
| GIZYIY   | 175.308 | (2-Furyl)oxoacetamide                                                                                                                                                                          |
| NAWHID   | 175.372 | 2-(1H-Indol-3-yl)-N-methyl-2-oxoacetamide                                                                                                                                                      |
| YARFIJ   | 175.643 | benzyl [(4-chlorophenyl)(oxo)acetyl]carbamate                                                                                                                                                  |
| KEKSUQ   | 175.682 | Methyl 3-(2-anilino-1-hydroxy-2-oxoethylidene)-4-((4-methoxybenzoyl)hydrazono)-2-methyl-5-oxo-1-phenylprolinate                                                                                |
| VILXOG   | 175.93  | N-{4-[(4,6-dimethylpyrimidin-2-yl)sulfamoyl]phenyl}-4-hydroxy-4-(4-methylphenyl)-2-oxobut-3-enamide acetic acid solvate                                                                        |

|          |         |                                                                                                                 |
|----------|---------|-----------------------------------------------------------------------------------------------------------------|
| ULAXIQ   | 176.148 | N-(4-Methoxyphenyl)-2-oxo-2-(4-phenyl-1,3-thiazol-2-yl)acetamide                                                |
| DURLEJ   | 176.215 | 4,4'-(ethane-1,2-diylidimino)bis(N-(2-methylphenyl)-4-(4-methylphenyl)-2-oxobut-3-enamide)                      |
| VOMTAV   | 176.996 | N',N'-diacetyl-3-(2,2-dimethyl-2,3-dihydrobenzo[f]isoquinolin-4(1H)-ylidene)-2-oxopropanehydrazide              |
| LOHPOO   | 178.355 | 4-Desoxy-4beta-((5-methoxy-1H-indol-3-yl)oxalylamino)podophyllotoxin methanol solvate                           |
| ACOKOU   | 178.4   | N-Benzyl-2-(1-methyl-1H-indol-3-yl)-2-oxoacetamide                                                              |
| WATSEQ   | 178.438 | 5,11,17,23-Tetra-t-butyl-25,27-dihydroxy-26,28-bis(2-(2-oxo-2-(2-thienyl)acetamido)ethoxy)calix(4)arene         |
| TIZZEH   | 178.826 | N-Methyl-2-(3'-(4''-chlorophenyl)-4',6'-dimethoxyindol-2'-yl)glyoxylamide                                       |
| URIBED   | 178.929 | 3-Diazo-N-[(2S)-1-hydroxypropan-2-yl]-2-oxopropanamide                                                          |
| GIZYIY   | 179.098 | (2-Furyl)oxoacetamide                                                                                           |
| GIZYIY01 | 179.193 | (2-Furyl)oxoacetamide                                                                                           |
| KAYBOE   | 179.295 | {3-[(methylamino)(oxo)acetyl]-1H-indol-7-yl}(2,4,6-trimethylphenyl)iodanium perchlorate acetone ethanol solvate |
| YICPEG   | 179.382 | 2-(5-Bromo-1-methyl-1H-indol-3-ylcarbonyl)-N-methylacetamide                                                    |
| KAYBOE   | 179.562 | {3-[(methylamino)(oxo)acetyl]-1H-indol-7-yl}(2,4,6-trimethylphenyl)iodanium perchlorate acetone ethanol solvate |
| QOWZUA   | 179.676 | 3-(3,3-dimethyl-3,4-dihydroisoquinolin-1(2H)-ylidene)-N-hydroxy-2-oxopropanamide                                |

### Carboxylic acid and ester structures containing the substructure C\*-CO-CO-O

| <i>Refcode</i> | <i>Dihedral angle</i> | <i>Compound Name</i>                                                                                   |
|----------------|-----------------------|--------------------------------------------------------------------------------------------------------|
| UBEPAS         | 0                     | t-Butyldiazopyruvate                                                                                   |
| PARVAH         | 2.971                 | 2-(Carboxycarbonyl)imidazo[1,2-a]pyridin-1-ium chloride methanol solvate monohydrate                   |
| XEPJOR         | 4.485                 | 4-Hydroxy-2-oxo-6-phenyl-3,5-hexadienoic acid                                                          |
| UWABAW         | 4.863                 | (E)-dimethyl 2-oxo-3-((4-oxo-4H-chromen-3-yl)methylene)succinate                                       |
| DAJBIB         | 10.318                | Imidazo[1,2-a]pyridin-1-ium-2-yl(oxo)acetate monohydrate                                               |
| QUZTOV         | 14.183                | (Z)-Ethyl 2-oxo-3-(1,2-dihydroquinolin-2-ylidene)propanoate                                            |
| ACMDOC         | 14.432                | (3-Chloro-4-hydroxyphenyl)-glyoxylic acid methyl ester                                                 |
| UPAHUQ         | 18.036                | ethyl 5-(ethoxy(oxo)acetyl)-2-phenylpyrimidine-4-carboxylate                                           |
| QUZTOV         | 26.242                | (Z)-Ethyl 2-oxo-3-(1,2-dihydroquinolin-2-ylidene)propanoate                                            |
| WOCTUD         | 31.396                | alpha-Oxo-2,4,6-trimethylbenzeneacetic acid                                                            |
| DUWFUY         | 33.148                | methyl (1-benzyl-4-phenyl-1H-1,2,3-triazol-5-yl)(oxo)acetate                                           |
| CUSWEV         | 35.668                | ethyl [1-benzyl-4-(3-fluorophenyl)-1H-1,2,3-triazol-5-yl](oxo)acetate                                  |
| ZADKAT         | 36.274                | ammonium oxo(phenyl)acetate                                                                            |
| XOMYAB         | 42.836                | methyl (2-acetamidophenyl)(oxo)acetate                                                                 |
| CUSVUK         | 44.161                | ethyl {1-[(4-methylphenyl)methyl]-4-phenyl-1H-1,2,3-triazol-5-yl}(oxo)acetate                          |
| CUSVOE         | 44.228                | Ethyl 2-(1-benzyl-4-(4-methoxyphenyl)-1H-1,2,3-triazol-5-yl)-2-oxoacetate                              |
| BOSRIM         | 45.895                | ethyl (1-benzyl-4-phenyl-1H-1,2,3-triazol-5-yl)(oxo)acetate                                            |
| DIVCES         | 46.521                | Ethyl (1-(3-methylbutyl)-4-phenyl-1H-1,2,3-triazol-5-yl)(oxo)acetate                                   |
| NETZIY         | 48.247                | ethyl oxo(1-oxo-2-phenyl-1H-inden-3-yl)acetate                                                         |
| CUSWAR         | 48.61                 | ethyl {4-(4-chlorophenyl)-1-[(4-methylphenyl)methyl]-1H-1,2,3-triazol-5-yl}(oxo)acetate                |
| BOPWOS         | 49.862                | Dimethyl 2-((2-((diethylamino)-carbonyl)-2-methyl-3-phenyl-1-aziridinyl)-ethylidene)-3-oxobutanedioate |
| YUCWUQ         | 53.748                | Ethyl (2-(3-nitrophenyl)-4-phenyl-1H-pyrrol-3-yl)(oxo)acetate                                          |
| BISZUB         | 58.717                | ethyl [2-(4-chlorophenyl)-1H-indol-3-yl](oxo)acetate                                                   |
| RIQKEH         | 60.159                | Dimethyl 2-oxo-3-(1',2',2',4'-pentamethyl-3'-oxopyrrolidin-5'-ylidene)butane-1,4-dioate                |
| COYDEB         | 61.159                | Ethyl (1-cyclohexyl-4-phenyl-1H-1,2,3-triazol-5-yl)(oxo)acetate                                        |
| WORYIL         | 64.561                | exo-1-(Diphenyl(hydroxy)methyl)-7,7-dimethylbicyclo(2.2.1)heptan-2-yl alpha-benzoylformate             |
| NERGAV         | 67.18                 | ethyl (Z)-4-(methylamino)-3-(4-nitrobenzene-1-carbonyl)-2-oxobut-3-enoate                              |
| NERTIQ         | 70.206                | (Z)-4-(butylamino)-3-(4-nitrobenzoyl)-2-oxobut-3-enoic acid ethyl ester                                |
| HEVSAC         | 72.03                 | Benzamidinium (2-acetamidobenzoyl)formate                                                              |
| NULYOK         | 72.696                | 2-isopropyl-5-methylcyclohexyl oxo(phenyl)acetate                                                      |
| QUBCEX         | 76.163                | diethyl 2,2'-perylene-3,9-diylbis(oxoacetate) ethyl acetate solvate                                    |

|          |         |                                                                                                                                                                                            |
|----------|---------|--------------------------------------------------------------------------------------------------------------------------------------------------------------------------------------------|
| KAQPEX   | 77.351  | Dimethyl 3,6-bis(triphenylphosphoranylidene)-2,4,5,7-tetraoxo-octanedioate deuterochloroform solvate                                                                                       |
| GIJXUU   | 79.585  | Ethyl 3-((4-methylphenyl)hydrazono)-2,4-dioxopentanoate                                                                                                                                    |
| NERTEM   | 79.768  | (Z)-4-(benzylamino)-3-(4-nitrobenzoyl)-2-oxobut-3-enoic acid ethyl ester                                                                                                                   |
| VAYLEP   | 81.122  | ethyl oxo(5-oxo-5H-[1,3]thiazolo[3,2-a]pyrimidin-6-yl)acetate                                                                                                                              |
| NERGEZ   | 81.129  | ethyl (Z)-4-(t-butylamino)-3-(4-nitrobenzene-1-carbonyl)-2-oxobut-3-enoate                                                                                                                 |
| COQBIU   | 81.559  | 2-(1H-indol-3-yl)ethanaminium oxo(3,4,5-trimethoxyphenyl)acetate                                                                                                                           |
| HEBJAA   | 81.821  | (Z)-1,4-Dimethoxy-3-[1-(4-methoxyphenyl)-2-phenyl-1,2-dihydroquinazolin-3-ium-3-yl]-1,4-dioxo-2-buten-2-olate monohydrate                                                                  |
| GOQRUC   | 82.159  | ethyl 2,4-dioxo-3-(phenylhydrazono)pentanoate                                                                                                                                              |
| KEHGOT   | 82.26   | Dimethyl 3-(2-phenyl-1,2-dihydrophthalazin-1-ylidene)-2-oxobutanedioate                                                                                                                    |
| HOCVAW   | 82.608  | Ethyl 3-(3,3-dimethyl-1,2,3,4-tetrahydroisoquinolidenehydrazono)-2-oxobutanoate                                                                                                            |
| VISKIT   | 82.994  | Methyl 2,4-dioxo-3-(phenylhydrazono)pentanoate                                                                                                                                             |
| HOTNIN   | 83.436  | 4-Methylamino-5-methoxycarbonyl-3-(2,3-bis(ethoxycarbonyl)-3-oxo-propenylamine)isoxazole                                                                                                   |
| JOSTOD   | 84.119  | t-butyl (4-nitrophenyl)(oxo)acetate                                                                                                                                                        |
| BOCNAJ   | 84.614  | Dimethyl 2-oxo-3-(3,4,4,5-pentamethyl-1-phenylimidazolidin-2-ylidene)succinate                                                                                                             |
| SURROO   | 86.164  | 1-(4-Bromo-3-(4-methoxyphenyl)isoquinolinium-2-yl)-1,2-bis(methoxycarbonyl)-2-oxoethanide                                                                                                  |
| QUBCEX   | 87.463  | diethyl 2,2'-perylene-3,9-diylbis(oxoacetate) ethyl acetate solvate                                                                                                                        |
| AVAGUZ   | 89.749  | Dimethyl 2-(1-hydroxy-4,4,5,5-tetramethyl-imidazolidin-2-ylidene)-3-oxo-succinate                                                                                                          |
| KASVEI   | 90.456  | 4-methoxy-3-(2,2,7,7,12,12,17,17-octaethyl-21,22,23,24-tetrathiapentacyclo[16.2.1.1\$3,6\$.1\$8,11\$.1\$13,16]\$tetracos-1(20),3,5,8,10,13-hexaene)-1,2-bis(methoxycarbonyl)-2-oxoethanide |
| SURROO   | 91.305  | 1-(4-Bromo-3-(4-methoxyphenyl)isoquinolinium-2-yl)-1,2-bis(methoxycarbonyl)-2-oxoethanide                                                                                                  |
| IDIYOL   | 92.554  | Methyl 2-(2-[(2-methylphenoxy)methyl]phenyl)-2-oxoacetate                                                                                                                                  |
| MEPBGY10 | 92.589  | (-)-Menthyl-p-bromophenyl-glyoxylate                                                                                                                                                       |
| IVEZOZ   | 92.873  | Ethyl (1-methyl-1H-imidazol-2-yl)(oxo)acetate                                                                                                                                              |
| BISTEF   | 93.209  | ethyl {5-methyl-2-[(4-methylphenyl)sulfanyl]-1H-indol-3-yl}(oxo)acetate                                                                                                                    |
| NERSOV   | 95.414  | ethyl 3-(4-nitrobenzene-1-carbonyl)-2-oxo-4-(phenylamino)but-3-enoate                                                                                                                      |
| VAYLAL   | 95.794  | ethyl oxo(4-oxo-4H-pyrido[1,2-a]pyrimidin-3-yl)acetate                                                                                                                                     |
| ISELAT   | 96.003  | (1R,2S,5R)-Menthyl alpha-naphthoylformate                                                                                                                                                  |
| MEPBGY10 | 96.476  | (-)-Menthyl-p-bromophenyl-glyoxylate                                                                                                                                                       |
| WORYOR   | 97.413  | exo-1-(Diphenyl(methoxy)methyl)-7,7-dimethylbicyclo(2.2.1)heptan-2-yl alpha-benzoylformate                                                                                                 |
| BOCNEN   | 97.562  | Dimethyl 2-(2-phenyl-4,4,5,5-tetramethyl-4,5-dihydro-1H-imidazolidin-3-ylidene)-3-oxo-succinate                                                                                            |
| ZERRAP   | 98.127  | 1-(4,6,7-Trioxo-3,8-dioxadecanido)-5H,7H-dibenzo(b,g)(1,5)selenoniumoxocine                                                                                                                |
| GADHEZ   | 99.836  | Methyl 2-(methoxyoxalyl)-2-(1,4,4-trimethylpyrrolidin-2-ylidene)acetate                                                                                                                    |
| NERTAI   | 99.896  | (Z)-4-(isopropylamino)-3-(4-nitrobenzoyl)-2-oxobut-3-enoic acid ethyl ester                                                                                                                |
| YUCMEQ   | 101.905 | 1-oxo-1-phenylpropan-2-yl oxo(phenyl)acetate                                                                                                                                               |
| XIWKEU   | 102.058 | syn-(R)-(3,4-dimethoxyphenyl)((R)-2-oxo-1,3-oxazolidin-4-yl)methyl 2-oxo-2-phenylacetate                                                                                                   |
| YUMLUN   | 102.205 | Methyl 3-benzoyl-4-((4-methylphenyl)amino)-2-oxo-4-phenyl-3-butenolate                                                                                                                     |
| DUFJET10 | 103.284 | (-)-(1R,2S,5R)-2-(1-Methyl-1-phenylethyl)-5-methylcyclohexyl phenylglyoxylate                                                                                                              |
| KOFBOX   | 103.825 | Methyl 2-(7-benzyloxy-1-naphthyl)-2-oxoacetate                                                                                                                                             |
| NEHTIG   | 104.032 | (4-(dimethylamino)phenyl)(oxo)acetic acid                                                                                                                                                  |
| BEXZUZ   | 107.166 | (2-Benzoyloxy-4,6-di-t-butyl-phenyl)-phenylglyoxylate                                                                                                                                      |
| NAWNIJ   | 109.044 | Methyl (2-((t-butoxycarbonyl)amino)phenyl)(oxo)acetate                                                                                                                                     |
| VEMBEX   | 109.401 | methyl oxo(pyrido[2,1-a]isoindol-6-yl)acetate                                                                                                                                              |
| NERGID   | 109.469 | (Z)-4-(t-butylamino)-3-(4-methoxybenzoyl)-2-oxobut-3-enoic acid ethyl ester                                                                                                                |
| DILHOW   | 110.78  | Methyl (2-methyl-1-phenylsulfonyl-1H-indol-3-yl)glyoxylate                                                                                                                                 |
| MEPBGY10 | 111.11  | (-)-Menthyl-p-bromophenyl-glyoxylate                                                                                                                                                       |
| MEPBGY10 | 111.504 | (-)-Menthyl-p-bromophenyl-glyoxylate                                                                                                                                                       |
| EYESIM   | 111.881 | methyl 2,4-dioxo-3-(triphenylphosphoranylidene)pentanoate                                                                                                                                  |
| AGUBAI   | 112.508 | methyl (2-(2,5-dimethylpyrrolidin-1-yl)phenyl)(oxo)acetate                                                                                                                                 |
| MAGSOE   | 113.056 | Methyl oxo(4-oxo-4H-chromen-3-yl)acetate                                                                                                                                                   |
| AGUBAI   | 113.074 | methyl (2-(2,5-dimethylpyrrolidin-1-yl)phenyl)(oxo)acetate                                                                                                                                 |

|        |         |                                                                                                                          |
|--------|---------|--------------------------------------------------------------------------------------------------------------------------|
| YUCWOK | 113.48  | Ethyl (2,4-diphenyl-1H-pyrrol-3-yl)(oxo)acetate                                                                          |
| KIKFEQ | 114.612 | Ethyl (2-methyl-1-phenylsulfonyl-1H-indole-3-carbonyl)acetate                                                            |
| WIWFOA | 115.496 | methyl 4-[(acetyloxy)methyl]-1,4-dimethyl-7,8-dioxo-2,3-dihydro-1H,4H-3a,6a-(epoxyethano)pentalen-5-yl)(oxo)acetate      |
| HEXTAG | 117.989 | 2-bromocyclohexyl oxo(phenyl)acetate                                                                                     |
| TAMNUT | 121.83  | methyl (4-chlorophenyl)(oxo)acetate                                                                                      |
| KAQPEX | 122.455 | Dimethyl 3,6-bis(triphenylphosphoranylidene)-2,4,5,7-tetraoxo-octanedioate deuteriochloroform solvate                    |
| QUGXAT | 123.308 | methyl (4-bromophenyl)(oxo)acetate                                                                                       |
| ODOFAR | 123.832 | (4-fluorophenyl)(oxo)acetic acid                                                                                         |
| ODOFAR | 124.054 | (4-fluorophenyl)(oxo)acetic acid                                                                                         |
| WUQHOH | 124.15  | ethyl (4-benzoyl-2-(4-fluorophenyl)-1-phenyl-5-thiocyanato-1H-pyrrol-3-yl)(oxo)acetate                                   |
| VIZVEG | 125.433 | 1-n-Butyl 4-ethyl 2-oxo-3-[phenyl(2-phenyl-1H-indol-3-yl)methylidene]butanedioate                                        |
| CEBZAM | 126.533 | Methyl (6-bromo-2-oxo-2H-chromen-3-yl)(oxo)acetate                                                                       |
| CEBZAM | 126.567 | Methyl (6-bromo-2-oxo-2H-chromen-3-yl)(oxo)acetate                                                                       |
| NERSUB | 127.841 | ethyl 4-[(4-methoxyphenyl)amino]-3-(4-nitrobenzene-1-carbonyl)-2-oxobut-3-enoate                                         |
| KEGMOB | 129.191 | ethyl 3-[[[5-methyl-2-(propan-2-yl)cyclohexyl]oxy]carbonyl]amino]-2-oxo-4-phenylbut-3-enoate                             |
| DIQZEK | 131.497 | Ethyl (6-(4-methylbenzoyl)-7-phenyl-2,3-dihydro-1H-pyrrolizin-5-yl)(oxo)acetate                                          |
| RIFXAF | 132.073 | Methyl 2-(2-methoxycarbonyl-6-(4-methoxyphenyl)-2H-thiopyran-3-yl)glyoxylate                                             |
| NEHTIG | 132.582 | (4-(dimethylamino)phenyl)(oxo)acetic acid                                                                                |
| KEGMIV | 133.248 | ethyl 3-[[[benzyloxy]carbonyl]amino]-2-oxo-4-phenylbut-3-enoate                                                          |
| WOCTOX | 134.295 | Phenylglyoxylic acid                                                                                                     |
| ZUYIID | 135.382 | Benzyl biphenyl-4-yl(oxo)acetate                                                                                         |
| FOGTAX | 135.444 | Methyl (4-methoxy-3-(methylsulfonyloxy)benzoyl)formate                                                                   |
| DORSOV | 136.865 | methyl [3,3-dicyano-5-ethenyl-2-(4-methylphenyl)cyclopent-1-en-1-yl](oxo)acetate                                         |
| TUFYUQ | 142.929 | methyl 3-(methoxy(oxo)acetyl)-1H-indole-1-carboxylate                                                                    |
| SUWJOL | 146.172 | ethyl 4-(ethoxy(oxo)acetyl)-1-phenyl-1H-pyrazole-5-carboxylate                                                           |
| WOGXUN | 148.282 | (4-Chlorophenyl)(oxo)acetic acid monohydrate                                                                             |
| YELPUD | 149.245 | ethyl (5-(4-nitrophenyl)-1,2-oxazol-4-yl)(oxo)acetate                                                                    |
| WOGXUN | 150.472 | (4-Chlorophenyl)(oxo)acetic acid monohydrate                                                                             |
| QARWOY | 152.088 | ethyl (5-bromo-1-(pyrimidin-2-yl)-2,3-dihydro-1H-indol-7-yl)(oxo)acetate                                                 |
| QARWOY | 152.247 | ethyl (5-bromo-1-(pyrimidin-2-yl)-2,3-dihydro-1H-indol-7-yl)(oxo)acetate                                                 |
| RIQJIK | 153.236 | Methyl 5,10,15,20-tetraphenylporphyrinyl-2-(1-keto)acetate                                                               |
| XIKHEH | 156.237 | methyl (3-nitrophenyl)(oxo)acetate                                                                                       |
| CIJWEX | 159.695 | 2,8-Dimethoxy-4-methoxycarbonyl-6-methyloxalyl-5-n-pentyl-dibenzofuran                                                   |
| HUFBEQ | 160.687 | Diethyl 2-oxo-3-(2-oxo-2,3-dihydro-1H-indol-3-ylidene)butanedioate                                                       |
| SARQIM | 161.938 | Ethyl (Z)-4-chloro-4-(p-fluorophenyl)-2-oxo-3-butenate                                                                   |
| HUFYOX | 164.816 | Methyl 2-(5-fluoro-1H-indol-3-yl)-2-oxoacetate                                                                           |
| GUGCER | 164.973 | 4-(6-Bromo-1-(4-fluorobenzyl)-4-oxo-1,4-dihydroquinolin-3-yl)-4-hydroxy-2-oxobut-3-enoic acid dimethyl sulfoxide solvate |
| QOMMAI | 165.085 | (E)-Ethyl 4-(4-chlorophenyl)-4-methoxy-2-oxobut-3-enoate                                                                 |
| CUQTOA | 165.525 | (1-methyl-1H-pyrazol-4-yl)(oxo)acetic acid                                                                               |
| NESTEL | 165.632 | 2,3,7,8-Tetraethyl-10H-dipyrinone-9-glyoxylic acid                                                                       |
| HUFBEQ | 169.495 | Diethyl 2-oxo-3-(2-oxo-2,3-dihydro-1H-indol-3-ylidene)butanedioate                                                       |
| XONJIU | 170.012 | (E)-Ethyl 4-(4-fluorophenyl)-4-methoxy-2-oxo-3-butenate                                                                  |
| NESTIP | 170.817 | 3,4-Diethyl-1H-pyrrole-2-glyoxylic acid                                                                                  |
| PARTUZ | 173.932 | 2-(Carboxycarbonyl)imidazo[1,2-a]pyridin-1-ium perchlorate monohydrate                                                   |
| SARQIM | 174.885 | Ethyl (Z)-4-chloro-4-(p-fluorophenyl)-2-oxo-3-butenate                                                                   |
| WACGIS | 174.963 | 2-Oxo-2-(2-thienyl)acetic acid                                                                                           |
| PEPDIX | 175.017 | Methyl 9-anthrylglyoxylate                                                                                               |
| HOKVOT | 175.97  | 4-(4-Bromophenyl)-2-oxo-3-butenic acid monohydrate                                                                       |
| PEPDIX | 175.988 | Methyl 9-anthrylglyoxylate                                                                                               |

|        |         |                                                                                                                                  |
|--------|---------|----------------------------------------------------------------------------------------------------------------------------------|
| TUBCOK | 176.069 | bis(2-(carboxycarbonyl)imidazo[1,2-a]pyridin-1-ium) imidazo[1,2-a]pyridin-1-ium-2-yl(oxo)acetate bis(hydrogen sulfate) dihydrate |
| CEBMUR | 176.247 | (4-Methoxy-2-oxo-pentene)-carboxylic acid methyl ester                                                                           |
| EYESAE | 176.5   | ethyl 2-oxo-3-(triphenylphosphoranylidene)propanoate                                                                             |
| VEYROJ | 177.115 | methyl (4-hydroxy-3,4-diphenyl-3a,4-dihydro-3H-pyrrolo[2,1-c][1,4]benzothiazin-2-yl)(oxo)acetate                                 |
| LOMKOP | 177.386 | methyl 2-(4-cyanophenyl)-5-(methoxy(oxo)acetyl)-3-furoate                                                                        |
| NESTEL | 177.506 | 2,3,7,8-Tetraethyl-10H-dipyrrinone-9-glyoxylic acid                                                                              |
| AFUNIA | 177.604 | Ethyl (Z)-4'-(4-ethoxy-1-hydroxy-3,4-dioxobut-1-en-1-yl)biphenyl-3-carboxylate                                                   |
| YIFWAM | 179.176 | (E)-Methyl 2-oxo-4-phenylbut-3-enoate                                                                                            |
| TUBCOK | 179.578 | bis(2-(carboxycarbonyl)imidazo[1,2-a]pyridin-1-ium) imidazo[1,2-a]pyridin-1-ium-2-yl(oxo)acetate bis(hydrogen sulfate) dihydrate |
| TUBCOK | 179.685 | bis(2-(carboxycarbonyl)imidazo[1,2-a]pyridin-1-ium) imidazo[1,2-a]pyridin-1-ium-2-yl(oxo)acetate bis(hydrogen sulfate) dihydrate |

## Theoretical calculations

The main text references state of the art TD-DFT calculations that provide insight into the nature of excitation in BDF dyes.<sup>1</sup> It also refers to parallel application of lower level  $\pi$ -electron-only PPP theory for calculation of the same properties especially  $\lambda_{\max}$  and  $\pi$ -electron charge transfer (CT) on excitation. The following Table lists in-house experimental results for BDF and related dyes, and corresponding values calculated by PPP-SCF-CI.<sup>2</sup> The data are compared in the plot. The degree of agreement between PPP-theory and experiment is reasonable and consistent with data from many other chromogens.<sup>2b</sup> (Note the problem associated with choice of experimental values for highly solvatochromic dyes. PPP does not make any allowance for data recorded in different solvents. The solvatochromism range of some of these dyes is unknown.) The deviations for the conjugate bases (red) from the ideal  $y = x$  line may be due to solvatochromic effects. Published comparison with TD-DFT for a different series of BDF dyes shows TD-DFT is superior, as to be expected.<sup>1</sup> However, this series does not include any anionic BDF or related derivatives.

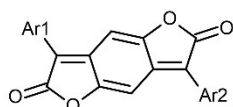

| BDF derivative                                   |                                                  | $\lambda_{\max}/\text{nm}$ |      |                   |
|--------------------------------------------------|--------------------------------------------------|----------------------------|------|-------------------|
| Ar1                                              | Ar2                                              | PPP                        | Expt | Solvent           |
| Ph                                               | Ph                                               | 483                        | 466  | CHCl <sub>3</sub> |
| Ph                                               | 4-MeOC <sub>6</sub> H <sub>4</sub>               | 495                        | 493  | EtOAc             |
| Ph                                               | 4-NH <sub>2</sub> C <sub>6</sub> H <sub>4</sub>  | 513                        | 590  | EtOAc             |
| Ph                                               | 4-EtNHC <sub>6</sub> H <sub>4</sub>              | 592                        | 615  | EtOAc             |
| Ph                                               | 4-Et <sub>2</sub> NC <sub>6</sub> H <sub>4</sub> | 669                        | 645  | EtOAc             |
| 4-MeOC <sub>6</sub> H <sub>4</sub>               | 4-MeOC <sub>6</sub> H <sub>4</sub>               | 518                        | 520  | EtOAc             |
| Ph                                               | 2-thienyl                                        | 533                        | 525  | acetone           |
| Ph                                               | 5-Et <sub>2</sub> N-2-thienyl                    | 715                        | 706  | EtOAc             |
| Ph                                               | PhCH=CH                                          | 525                        | 525  | EtOAc             |
| Ph                                               | 4-O <sup>(-)</sup> C <sub>6</sub> H <sub>4</sub> | 703                        | 820  | DMSO              |
| 4-O <sup>(-)</sup> C <sub>6</sub> H <sub>4</sub> | 4-O <sup>(-)</sup> C <sub>6</sub> H <sub>4</sub> | 818                        | 902  | DMSO              |

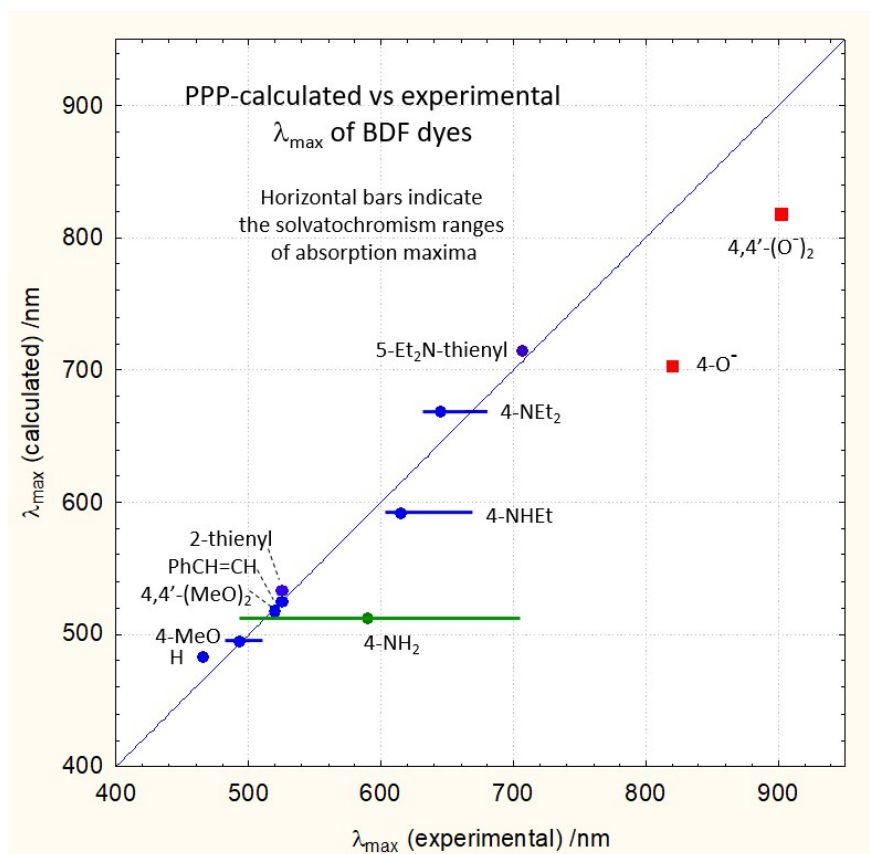

The graphics below show  $\pi$ -electron CT on excitation as calculated by PPP. Open circles represent sites of electron donation. Filled circles are electron-acceptor sites. The circle sizes reflect the relative amount of  $\pi$ -electron density transferred between ground state  $S_0$  and first excited site  $S_1$ . That on the left is a 4-donor-substituted BDF. That on the right is the corresponding 4,4'-disubstituted BDF. Planar geometries were input in these runs, but the same CT pattern is found for nonplanar conformations. Electron density is transferred from electron rich pendant aryl substituents into the BDF tricyclic core, a novel complex delocalised electron acceptor.

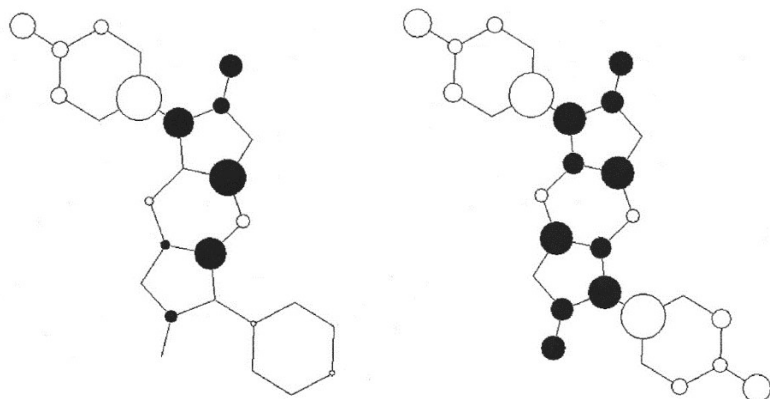

Heteroatom identities are not shown in these diagrams. Refer to the generic structure in the Table above.

TD-DFT calculations<sup>1</sup> apparently give similar patterns of CT for  $S_1$ . Consequently we judge that PPP is sufficiently reliable to be also applied to the ring-opened conjugate bases **16** and **17** discussed in the main text. The key result is that both carbonyl units of their planar COCOR substituents act as  $\pi$ -electron acceptor centres on excitation, but that only the ketone is an acceptor when non-planar because of torsion about the CO-COR bond. Thus the planar conformation has a more bathochromic influence than nonplanar.

## References

1. J. P. Cerón-Carrasco, A. Ripoche, F. Odobel, and D. Jacquemin, *Dyes and Pigments*, 2012, **92**, 1144-1152
2. (a) R. Naef, PiSystem98, Im Budler 6, CH-4419 Lupsingen, Switzerland; (b) M. G. Hutchings, *Dyes and Pigments*, 1995, **29**, 95-101
